# Supplementary material
Source: HighWire-hosted journal article supplement (doi:10.1101/rna.079656.123)
Supplement: Supplemental_Tables_.xlsx [file Supplemental_Tables_.xlsx]

## Sheet: Table S1
Table S1: Unique oligonucleotide digestion products detected in complete S. cerevisiae total tRNA RNase T1 digestion
Level	No.	Identification	Positions	Oligo Sequence	Mod	Site	∆ ppm	Conf. Score	Seq Length	Nonunique Seq	Isomer Group	Num of Iso Seq	Digest position	Best ASR	ID Type	Integration Type	RT	M/Z	Charge St.	Mono Mass Exp.	Avg Mass Exp.	Mono Mass Theo.	Missed Cleavages	Max Cond.	Min Cond.	Max MS Area	Avg MS Area: unfold	%CV: unfold	MS Area:2023_0221_unfolded_SC_tRNA_RT1_CIP_45mgmL_1.raw	∆ ppm:2023_0221_unfolded_SC_tRNA_RT1_CIP_45mgmL_1.raw	ID Type:2023_0221_unfolded_SC_tRNA_RT1_CIP_45mgmL_1.raw	RT:2023_0221_unfolded_SC_tRNA_RT1_CIP_45mgmL_1.raw	M/Z:2023_0221_unfolded_SC_tRNA_RT1_CIP_45mgmL_1.raw	Mono Mass Exp.:2023_0221_unfolded_SC_tRNA_RT1_CIP_45mgmL_1.raw	Avg Mass Exp.:2023_0221_unfolded_SC_tRNA_RT1_CIP_45mgmL_1.raw	MS Area:2023_0221_unfolded_SC_tRNA_RT1_CIP_45mgmL_2.raw	∆ ppm:2023_0221_unfolded_SC_tRNA_RT1_CIP_45mgmL_2.raw	ID Type:2023_0221_unfolded_SC_tRNA_RT1_CIP_45mgmL_2.raw	RT:2023_0221_unfolded_SC_tRNA_RT1_CIP_45mgmL_2.raw	M/Z:2023_0221_unfolded_SC_tRNA_RT1_CIP_45mgmL_2.raw	Mono Mass Exp.:2023_0221_unfolded_SC_tRNA_RT1_CIP_45mgmL_2.raw	Avg Mass Exp.:2023_0221_unfolded_SC_tRNA_RT1_CIP_45mgmL_2.raw	Oligo	Comment
Component	3019	17:U7-G10 = 1238.2104m	7-10	Ur-pUr-pAr-pGm	None		2.37	99.1	0	0	0	0	0	1	MS2	Automatic	18.81	618.099	-2	1238.21	1238.7	1238.21	0	unfold	unfold	11498684	10718890	10	9939096	2.37	MS2	18.81	618.099	1238.21	1238.7	11498684	2.37	MS2	18.79	618.099	1238.21	1238.7	18: Lys_3UU
Component	3197	16:U7-G10 = 1268.2210m	7-10	Ur-pUr-pGm-pGm	None		2.07	99.1	0	0	0	0	0	1	MS2	Automatic	19	633.105	-2	1268.22	1268.73	1268.22	1	unfold	unfold	3591637	3184636	18	2777634	2.07	MS2	19	633.105	1268.22	1268.73	3591637	1.97	MS2	19.01	633.104	1268.22	1268.73	17: Lys_CUU
Component	4150	27:A75-A78 = 1206.2318m	75-78	Ar-pCr-pCr-pAr	None		2.2	99.9	0	0	0	0	0	1	MS2	Automatic	20.33	602.11	-2	1206.23	1206.73	1206.23	0	unfold	unfold	7267363	6648282	13	7267363	2.2	MS2	20.33	602.11	1206.23	1206.73	6029201	2.2	MS2	20.31	602.11	1206.23	1206.73	31: Tyr_GUA
Component	4527	27:A75-A78 = 1206.2318m	75-78	Ar-pCr-pCr-pAr	None		2.5	99.9	0	0	0	0	0	1	MS2	Automatic	20.73	602.11	-2	1206.23	1206.72	1206.23	0	unfold	unfold	930506	831936	17	930506	2.5	MS2	20.73	602.11	1206.23	1206.72	733367	2.7	MS2	20.73	602.11	1206.24	1206.73	31: Tyr_GUA
Component	4646	20:D19-G22 = 1226.2104m	19-22	Dr-pAr-pUr-pGr	None		0.8	97.9	0	0	0	0	0	1	MS2	Automatic	20.92	612.098	-2	1226.21	1226.69	1226.21	0	unfold	unfold	43115580	42719894	1	43115580	0.8	MS2	20.92	612.098	1226.21	1226.69	42324208	0.8	MS2	20.93	612.098	1226.21	1226.69	22: Pro_UGG
Component	5047	4:C43-G46 = 1246.2380m	43-46	Cr-pAr-pAr-pGr	None		1.9	99.9	0	0	0	0	0	1	MS2	Automatic	21.36	622.113	-2	1246.24	1246.74	1246.24	0	unfold	unfold	42884468	41797144	4	40709820	1.9	MS2	21.36	622.113	1246.24	1246.74	42884468	1.6	MS2	21.35	622.113	1246.24	1246.74	4: Asn_GUU
Component	5143	27:D16-G19 = 1258.2367m	16-19	Dr-pDr-pGm-pGr	None		1.1	99.7	0	0	0	0	0	1	MS2	Automatic	21.47	628.112	-2	1258.24	1259.15	1258.24	1	unfold	unfold	29796176	29258377	3	29796176	1.1	MS2	21.47	628.112	1258.24	1259.15	28720578	0.81	MS2	21.46	628.112	1258.24	1258.67	31: Tyr_GUA
Component	6050	1:C36-G39 = 1238.2104m	36-39	Cr-pFr-pUr-pGr	None		1.88	95.4	0	0	0	0	0	1	MS2	Automatic	22.49	618.099	-2	1238.21	1238.7	1238.21	0	unfold	unfold	29474894	29409904	0	29344914	1.88	MS2	22.49	618.099	1238.21	1238.7	29474894	1.88	MS2	22.52	618.099	1238.21	1238.7	1: Ala_AGC
Component	6066	1:C36-G39 = 1238.2104m(Na+)	36-39	Cr-pFr-pUr-pGr	Na+		-2.04	95	0	0	0	0	0	1	MS2	Automatic	22.48	629.088	-2	1260.19	1260.71	1260.19	0	unfold	unfold	1844193	1823019	2	1844193	-2.04	MS2	22.48	629.088	1260.19	1260.71	1801845	-1.84	MS2	22.53	629.088	1260.19	1260.71	1: Ala_AGC
Component	6339	5:C42-G45 = 1222.2268m	42-45	Cr-pCr-pAr-pGr	None		-0.36	97.9	0	0	0	0	0	1	MS2	Automatic	22.9	610.106	-2	1222.23	1222.67	1222.23	0	unfold	unfold	29137684	28967816	1	28797948	-0.36	MS2	22.9	610.106	1222.23	1222.67	29137684	-0.56	MS2	22.89	610.106	1222.23	1222.67	5: Asp_GUC
Component	6816	10:G38-G41 = 1252.2373m	38-41	Gm-pCr-pCr-pGr	None		1.35	94.9	0	0	0	0	0	1	MS2	Automatic	23.24	625.112	-2	1252.24	1252.73	1252.24	1	unfold	unfold	2603109	2388075	13	2173041	1.35	MS2	23.24	625.112	1252.24	1252.73	2603109	1.15	MS2	23.26	625.112	1252.24	1252.73	11: His_GUG_2
Component	8405	10:U12-G16 = 1553.2473m	12-16	Ur-pAr-pUr-pAr-pGr	None		2.28	99.1	0	0	0	0	0	1	MS2	Automatic	24.59	775.618	-2	1553.25	1554.01	1553.25	0	unfold	unfold	54370340	52756640	4	51142940	2.28	MS2	24.59	775.618	1553.25	1554.01	54370340	2.28	MS2	24.6	775.618	1553.25	1553.64	11: His_GUG_2
Component	8804	11:A47-G51 = 1568.2946m	47-51	Ar-pDr-pCm-pAr-pGr	None		2	97.6	0	0	0	0	0	1	MS2	Automatic	24.81	783.142	-2	1568.3	1568.89	1568.29	0	unfold	unfold	24761192	24054331	4	23347470	2	MS2	24.81	783.142	1568.3	1568.89	24761192	1.53	MS2	24.81	783.141	1568.3	1568.9	12: Ile_AAU
Component	9106	29:C41-G45 = 1575.2905m	41-45	Cr-pAr-pAr-pAr-pGr	None		1.95	100	0	0	0	0	0	1	MS2	Automatic	25.03	786.64	-2	1575.29	1575.88	1575.29	0	unfold	unfold	13470887	12234324	14	10997760	1.95	MS2	25.03	786.64	1575.29	1575.88	13470887	1.87	MS2	25.06	786.639	1575.29	1575.89	33: Val_CAC
Component	9368	24:C41-G45 = 1543.2517m	41-45	Cr-pAr-pUr-pUm-pGr	None		1.25	100	0	0	0	0	0	1	MS2	Automatic	25.27	770.62	-2	1543.25	1543.83	1543.25	0	unfold	unfold	13927199	12766247	13	11605295	1.25	MS2	25.27	770.62	1543.25	1543.83	13927199	1.02	MS2	25.28	770.619	1543.25	1543.84	27: Ser_GCU
Component	9503	30:D20-G24 = 1534.2514m	20-24	Dr-pDr-pAr-pUr-pGr	None		1.96	100	0	0	0	0	0	1	MS2	Automatic	25.35	766.12	-2	1534.25	1534.83	1534.25	0	unfold	unfold	60328280	57848024	6	55367768	1.96	MS2	25.35	766.12	1534.25	1534.83	60328280	2.04	MS2	25.36	766.12	1534.25	1534.83	34: Val_AAC
Component	9994	10:U12-G16 = 1553.2473m	12-16	Ur-pAr-pUr-pAr-pGr	None		2.36	99.6	0	0	0	0	0	1	MS2	Automatic	25.74	775.618	-2	1553.25	1553.83	1553.25	0	unfold	unfold	35870496	35327978	2	35870496	2.36	MS2	25.74	775.618	1553.25	1553.83	34785460	2.52	MS2	25.74	775.618	1553.25	1553.83	11: His_GUG_2
Component	10874	22:A31-G35 = 1600.2732m	31-35	Ar-pCm-pUr-pLr-pGr	None		1.6	99.3	0	0	0	0	0	1	MS2	Automatic	26.41	799.131	-2	1600.28	1600.86	1600.27	0	unfold	unfold	4157809	3954972	7	3752134	1.6	MS2	26.41	799.131	1600.28	1600.86	4157809	1.6	MS2	26.44	799.131	1600.28	1600.86	24: Ser_UGA
Component	10906	8:U11-G15 = 1530.2201m	11-15	Ur-pUr-pUr-pAr-pGr	None		2.71	99.1	0	0	0	0	0	1	MS2	Automatic	26.42	764.105	-2	1530.22	1530.78	1530.22	0	unfold	unfold	102040144	99845820	3	97651496	2.71	MS2	26.42	764.105	1530.22	1530.78	102040144	2.39	MS2	26.43	764.105	1530.22	1530.79	8: Gly_GCC
Component	10984	8:U11-G15 = 1530.2201m	11-15	Ur-pUr-pUr-pAr-pGr	None		2.63	99.1	0	0	0	0	0	1	MS2	Automatic	26.41	1529.22	-1	1530.22	1530.76	1530.22	0	unfold	unfold	1846116	1824825	2	1846116	2.63	MS2	26.41	1529.22	1530.22	1530.76	1803533	3.83	MS2	26.4	1529.22	1530.23	1530.74	8: Gly_GCC
Component	11294	24:C25-G29 = 1596.2895m	25-29	Cr-pOr-pAr-pUr-pGr	None		1.48	98.2	0	0	0	0	0	1	MS2	Automatic	26.76	797.139	-2	1596.29	1596.78	1596.29	0	unfold	unfold	584652	518550	18	452449	1.48	MS2	26.76	797.139	1596.29	1596.78	584652	1.71	MS2	26.78	797.139	1596.29	1596.86	27: Ser_GCU
Component	11551	30:U3-G7 = 1506.2089m	3-7	Ur-pUr-pUr-pCr-pGr	None		2.68	100	0	0	0	0	0	1	MS2	Automatic	26.96	752.099	-2	1506.21	1506.78	1506.21	0	unfold	unfold	38487228	37971512	2	37455796	2.68	MS2	26.96	752.099	1506.21	1506.78	38487228	2.92	MS2	26.99	752.099	1506.21	1506.78	34: Val_AAC
Component	11644	19:A5-G10 = 1873.2883m	5-10	Ar-pUr-pUr-pUr-pAr-pGm	None		1.99	96.9	0	0	0	0	0	1	MS2	Automatic	27.17	935.639	-2	1873.29	1874.09	1873.29	0	unfold	unfold	43022348	42479552	2	41936756	1.99	MS2	27.17	935.639	1873.29	1874.09	43022348	1.93	MS2	27.17	935.639	1873.29	1874.1	20: Phe_GAA_1
Component	11978	20:C30-G34 = 1506.2089m	30-34	Cr-pUr-pUr-pUr-pGr	None		3.08	100	0	0	0	0	0	1	MS2	Automatic	27.46	752.099	-2	1506.21	1506.78	1506.21	0	unfold	unfold	47030832	34251538	53	47030832	3.08	MS2	27.46	752.099	1506.21	1506.78	21472244	3.16	MS2	27.5	752.1	1506.21	1506.78	22: Pro_UGG
Component	12198	11:C26-G30 = 1527.2680m	26-30	Cr-pAr-pCr-pCr-pGr	None		1.77	99.5	0	0	0	0	0	1	MS2	Automatic	27.7	762.628	-2	1527.27	1527.86	1527.27	0	unfold	unfold	42881556	41515640	5	40149724	1.77	MS2	27.7	762.628	1527.27	1527.86	42881556	2.41	MS2	27.73	762.629	1527.27	1527.48	12: Ile_AAU
Component	12369	23:C25-G30 = 1948.3692m	25-30	Cr-pOr-pAr-pAr-pAr-pGr	None		1.64	99.9	0	0	0	0	0	1	MS2	Automatic	27.85	973.179	-2	1948.37	1949.19	1948.37	0	unfold	unfold	1775581	1436407	33	1097232	1.64	MS2	27.85	973.179	1948.37	1949.19	1775581	1.95	MS2	27.85	973.179	1948.37	1949.2	25: Ser_IGA_1
Component	12398	22:A36-G42 = 2255.4037m	36-42	Ar-pEr-pAr-pUr-pCr-pUr-pGr	None		3.07	99.9	0	0	0	0	0	1	MS2	Automatic	27.85	750.796	-3	2255.41	2256.28	2255.4	0	unfold	unfold	6470621	6106362	8	5742103	3.07	MS2	27.85	750.796	2255.41	2256.28	6470621	2.96	MS2	27.86	750.796	2255.41	2256.3	24: Ser_UGA
Component	12427	7:A5-G10 = 1882.2998m	5-10	Ar-pUr-pAr-pUr-pAr-pGr	None		1.28	100	0	0	0	0	0	1	MS2	Automatic	27.87	940.144	-2	1882.3	1883.11	1882.3	0	unfold	unfold	37141080	34548618	11	31956156	1.28	MS2	27.87	940.144	1882.3	1883.11	37141080	1.48	MS2	27.87	940.144	1882.3	1883.08	7: Glu_UUC
Component	13466	3:A37-G42 = 1880.3318m	37-42	Ar-pAr-pCr-pCr-pAr-pGr	None		1.36	100	0	0	0	0	0	1	MS2	Automatic	28.72	939.16	-2	1880.33	1881.17	1880.33	0	unfold	unfold	13965482	13592578	4	13219675	1.36	MS2	28.72	939.16	1880.33	1881.17	13965482	0.9	MS2	28.74	939.159	1880.33	1881.16	3: Arg_ICG
Component	13474	24:C35-G39 = 1697.3008m	35-39	Cr-pUr-pBr-pAr-pGr	None		2.22	0	0	0	0	0	0	1	MS2	Automatic	28.73	847.645	-2	1697.3	1697.94	1697.3	0	unfold	unfold	6319884	6127092	4	5934300	2.22	MS2	28.73	847.645	1697.3	1697.94	6319884	1.93	MS2	28.75	847.645	1697.3	1697.95	27: Ser_GCU
Component	13597	22:C25-G30 = 1924.3580m	25-30	Cr-pOr-pAr-pCr-pAr-pGr	None		2.17	99.8	0	0	0	0	0	1	MS2	Automatic	28.89	961.174	-2	1924.36	1924.87	1924.36	0	unfold	unfold	789115	689398	20	589682	2.17	MS2	28.89	961.174	1924.36	1924.87	789115	1.91	MS2	28.9	961.174	1924.36	1925.15	24: Ser_UGA
Component	13996	12:C25-G29 = 1505.2248m	25-29	Cr-pUr-pUr-pCr-pGr	None		2.44	99.3	0	0	0	0	0	1	MS2	Automatic	29.19	751.607	-2	1505.23	1505.8	1505.22	0	unfold	unfold	9793042	9577060	3	9361079	2.44	MS2	29.19	751.607	1505.23	1505.8	9793042	2.52	MS2	29.2	751.607	1505.23	1505.8	13: Ile_UAU
Component	14210	19:A66-G71 = 1858.2886m	66-71	Ar-pAr-pUr-pUr-pCr-pGr	None		2.42	100	0	0	0	0	0	1	MS2	Automatic	29.36	928.139	-2	1858.29	1859.07	1858.29	0	unfold	unfold	43807392	43526340	1	43807392	2.42	MS2	29.36	928.139	1858.29	1859.07	43245288	2.16	MS2	29.39	928.139	1858.29	1859.08	20: Phe_GAA_1
Component	14224	19:A66-G71 = 1858.2886m	66-71	Ar-pAr-pUr-pUr-pCr-pGr	None		2.42	100	0	0	0	0	0	0	Full	Automatic	29.37	1857.78	-1	1858.29	1859	1858.29	0	unfold	unfold	650367	459722	59	650367	2.42	Full	29.37	1857.78	1858.29	1859	269078	266.55	Full	29.38	1857.78	1858.78	1859.12	20: Phe_GAA_1
Component	14294	25:U36-G40 = 1698.2848m	36-40	Ur-pBr-pAr-pUr-pGr	None		1.92	0	0	0	0	0	0	1	MS2	Automatic	29.41	848.137	-2	1698.29	1698.92	1698.28	0	unfold	unfold	7571712	7485934	2	7571712	1.92	MS2	29.41	848.137	1698.29	1698.92	7400155	1.78	MS2	29.43	848.137	1698.29	1698.92	29: Thr_AGU_2
Component	14478	3:T54-G59 = 1886.3199m	54-59	Tr-pUr-pCr-pAr-pAm-pGr	None		1.26	97.4	0	0	0	0	0	1	MS2	Automatic	29.54	942.154	-2	1886.32	1887.13	1886.32	0	unfold	unfold	15314336	15149032	2	14983729	1.26	MS2	29.54	942.154	1886.32	1887.13	15314336	1.45	MS2	29.57	942.154	1886.32	1887.14	3: Arg_ICG
Component	14704	16:C13-G18 = 1859.3202m	13-18	Cr-pAr-pAr-pDr-pCr-pGr	None		1.49	99.8	0	0	0	0	0	0	Full	Automatic	29.66	1858.55	-1	1859.32	1859.55	1859.32	0	unfold	unfold	321740	172080	123	321740	1.49	Full	29.66	1858.55	1859.32	1859.55	22420	125.51	Full	29.67	1858.55	1859.55	1860.03	17: Lys_CUU
Component	14735	16:C13-G18 = 1859.3202m	13-18	Cr-pAr-pAr-pDr-pCr-pGr	None		1.49	99.8	0	0	0	0	0	1	MS2	Automatic	29.68	618.767	-3	1859.32	1860.17	1859.32	0	unfold	unfold	6387324	6235528	3	6083733	1.49	MS2	29.68	618.767	1859.32	1860.17	6387324	1.42	MS2	29.69	618.767	1859.32	1860.15	17: Lys_CUU
Component	14789	25:U36-G40 = 1698.2848m	36-40	Ur-pBr-pAr-pUr-pGr	None		2.07	0	0	0	0	0	0	1	MS2	Automatic	29.82	848.137	-2	1698.29	1698.92	1698.28	0	unfold	unfold	25138620	22658004	15	20177388	2.07	MS2	29.82	848.137	1698.29	1698.92	25138620	1.28	MS2	29.83	848.136	1698.29	1698.94	29: Thr_AGU_2
Component	14829	16:C13-G18 = 1859.3202m	13-18	Cr-pAr-pAr-pDr-pCr-pGr	None		1.49	99.8	0	0	0	0	0	1	MS2	Automatic	29.68	928.654	-2	1859.32	1860.1	1859.32	0	unfold	unfold	29499812	29129353	2	29499812	1.49	MS2	29.68	928.654	1859.32	1860.1	28758894	-21.82	MS2	29.85	928.633	1859.28	1860.07	17: Lys_CUU
Component	15156	16:C25-G30 = 1902.3148m	25-30	Cr-pOr-pUr-pAr-pUr-pGr	None		2.76	99.8	0	0	0	0	0	1	MS2	Automatic	30.12	950.153	-2	1902.32	1903.11	1902.31	0	unfold	unfold	25880782	23595095	14	21309408	2.76	MS2	30.12	950.153	1902.32	1903.11	25880782	2.31	MS2	30.11	950.152	1902.32	1903.12	17: Lys_CUU
Component	15187	16:C25-G30 = 1902.3148m	25-30	Cr-pOr-pUr-pAr-pUr-pGr	None		3.02	99.8	0	0	0	0	0	1	MS2	Automatic	30.12	633.1	-3	1902.32	1903.09	1902.31	0	unfold	unfold	6436782	5905964	13	5375146	3.02	MS2	30.12	633.1	1902.32	1903.09	6436782	2.63	MS2	30.13	633.099	1902.32	1903.11	17: Lys_CUU
Component	15442	31:A57-G62 = 1894.3474m	57-62	Am-pAr-pAr-pCr-pCr-pGr	None		1.91	99.7	0	0	0	0	0	1	MS2	Automatic	30.35	946.168	-2	1894.35	1895.17	1894.35	0	unfold	unfold	6969372	6872748	2	6776125	1.91	MS2	30.35	946.168	1894.35	1895.17	6969372	1.85	MS2	30.34	946.168	1894.35	1895.17	35: Ini_CAU
Component	15646	29:A70-A76 = 2169.3782m	70-76	Ar-pAr-pCr-pAr-pCr-pCr-pAr	None		2.14	100	0	0	0	0	0	1	MS2	Automatic	30.52	722.12	-3	2169.38	2170.31	2169.38	0	unfold	unfold	5039159	4373461	22	3707764	2.14	MS2	30.52	722.12	2169.38	2170.31	5039159	2.14	MS2	30.53	722.12	2169.38	2170.32	33: Val_CAC
Component	15696	28:A47-G52 = 1849.3246m	47-52	Ar-pDr-pCr-pCm-pCr-pGr	None		0.76	100	0	0	0	0	0	1	MS2	Automatic	30.55	923.656	-2	1849.33	1850.13	1849.32	0	unfold	unfold	3671331	3488272	7	3305213	0.76	MS2	30.55	923.656	1849.33	1850.13	3671331	0.82	MS2	30.54	923.656	1849.33	1850.13	32: Val_UAC
Component	16180	28:A71-A77 = 2146.3510m	71-77	Ar-pUr-pCr-pAr-pCr-pCr-pAr	None		2.1	100	0	0	0	0	0	1	MS2	Automatic	31.03	714.445	-3	2146.36	2147.26	2146.35	0	unfold	unfold	12246020	12001895	3	12246020	2.1	MS2	31.03	714.445	2146.36	2147.26	11757770	2.33	MS2	31.05	714.445	2146.36	2147.27	32: Val_UAC
Component	16430	6:C34-G41 = 2560.4450m	34-41	Cr-pAr-pEr-pAr-pUr-pCr-pUr-pGr	None		2.22	100	0	0	0	0	0	1	MS2	Automatic	31.21	852.81	-3	2560.45	2561.58	2560.45	0	unfold	unfold	17178550	16505110	6	15831670	2.22	MS2	31.21	852.81	2560.45	2561.58	17178550	2.6	MS2	31.21	852.477	2560.45	2561.57	6: Cys_GCA
Component	16448	16:C25-G30 = 1902.3148m	25-30	Cr-pOr-pUr-pAr-pUr-pGr	None		1.86	99.4	0	0	0	0	0	1	MS2	Automatic	31.21	950.152	-2	1902.32	1903.19	1902.31	0	unfold	unfold	1620477	1550662	6	1480846	1.86	MS2	31.21	950.152	1902.32	1903.19	1620477	2.12	MS2	31.21	950.152	1902.32	1903.13	17: Lys_CUU
Component	16562	17:U1-G6 = 1811.2501m	1-6	Ur-pCr-pCr-pUr-pUr-pGr	None		2.48	99	0	0	0	0	0	1	MS2	Automatic	31.27	904.62	-2	1811.25	1812.03	1811.25	0	unfold	unfold	5943712	5555127	10	5166542	2.48	MS2	31.27	904.62	1811.25	1812.03	5943712	2.48	MS2	31.27	904.62	1811.25	1812.03	18: Lys_3UU
Component	16840	11:A71-A77 = 2145.3669m	71-77	Ar-pCr-pCr-pAr-pCr-pCr-pAr	None		2.05	100	0	0	0	0	0	1	MS2	Automatic	31.46	714.117	-3	2145.37	2146.29	2145.37	0	unfold	unfold	12547965	12093690	5	11639416	2.05	MS2	31.46	714.117	2145.37	2146.29	12547965	2.05	MS2	31.48	714.117	2145.37	2146.28	12: Ile_AAU
Component	16930	1:D47-G52 = 1812.2818m	47-52	Dr-pCr-pUr-pCr-pCr-pGr	None		2.6	100	0	0	0	0	0	1	MS2	Automatic	31.6	905.136	-2	1812.29	1813.05	1812.28	0	unfold	unfold	19876744	18514551	10	17152358	2.6	MS2	31.6	905.136	1812.29	1813.05	19876744	3.41	MS2	31.59	905.137	1812.29	1813.01	1: Ala_AGC
Component	17125	13:G38-G43 = 1864.2879m	38-43	Gm-pCr-pUr-pCr-pUr-pGr	None		1.85	99.2	0	0	0	0	0	1	MS2	Automatic	31.72	931.138	-2	1864.29	1865.08	1864.29	1	unfold	unfold	6158274	5848076	8	5537879	1.85	MS2	31.72	931.138	1864.29	1865.08	6158274	1.46	MS2	31.71	931.138	1864.29	1865.1	14: Leu_UAG
Component	17160	30:C26-G31 = 1834.2774m	26-31	Cr-pAr-pUr-pCr-pUr-pGr	None		2.38	99.6	0	0	0	0	0	1	MS2	Automatic	31.73	916.134	-2	1834.28	1835.06	1834.28	0	unfold	unfold	17679832	17188066	4	16696300	2.38	MS2	31.73	916.134	1834.28	1835.06	17679832	2.58	MS2	31.74	916.134	1834.28	1835.06	34: Val_AAC
Component	17163	3:A46-G52 = 2179.3612m	46-52	Ar-pDr-pUr-pCm-pCr-pAr-pGr	None		2.31	100	0	0	0	0	0	1	MS2	Automatic	31.73	725.448	-3	2179.37	2180.28	2179.36	0	unfold	unfold	9991153	9651184	5	9311214	2.31	MS2	31.73	725.448	2179.37	2180.28	9991153	2.42	MS2	31.74	725.448	2179.37	2180.28	3: Arg_ICG
Component	17325	10:A58-G64 = 2164.3139m	58-64	Ar-pUr-pUr-pCr-pUr-pAr-pGr	None		2.96	100	0	0	0	0	0	1	MS2	Automatic	31.89	720.433	-3	2164.32	2165.07	2164.31	0	unfold	unfold	11975864	11774548	2	11975864	2.96	MS2	31.89	720.433	2164.32	2165.07	11573233	3.64	MS2	31.91	720.433	2164.32	2165.05	11: His_GUG_2
Component	17476	11:A59-G64 = 1847.3090m	59-64	Am-pUr-pCr-pCr-pCr-pGr	None		1.96	100	0	0	0	0	0	1	MS2	Automatic	31.87	922.649	-2	1847.31	1848.12	1847.31	0	unfold	unfold	9541982	9406019	2	9270056	1.96	MS2	31.87	922.649	1847.31	1848.12	9541982	1.96	MS2	31.86	922.649	1847.31	1847.33	12: Ile_AAU
Component	17609	8:C34-G39 = 1833.2933m	34-39	Cr-pCr-pAr-pUr-pCr-pGr	None		1.79	99.5	0	0	0	0	0	1	Both	Automatic	32.06	915.641	-2	1833.3	1833.5	1833.29	0	unfold	unfold	24064240	12032120	141	24064240	1.79	MS2	32.06	915.641	1833.3	1833.5	0	84.89	Full	32.05	915.641	1833.45	1833.47	8: Gly_GCC
Component	17636	8:C34-G39 = 1833.2933m	34-39	Cr-pCr-pAr-pUr-pCr-pGr	None		-1.41	97.5	0	0	0	0	0	0	Full	Automatic	32.06	1832.28	-1	1833.29	1833.75	1833.29	0	unfold	unfold	284010	263237	11	242464	-1.41	Full	32.06	1832.28	1833.29	1833.75	284010	-5.4	Full	32.05	1832.28	1833.28	1833.58	8: Gly_GCC
Component	17694	5:U11-G17 = 2167.3136m	11-17	Ur-pUr-pUr-pAr-pAr-pDr-pGr	None		2.66	100	0	0	0	0	0	1	MS2	Automatic	32.17	721.433	-3	2167.32	2168.21	2167.31	0	unfold	unfold	56885456	53498860	9	50112264	2.66	MS2	32.17	721.433	2167.32	2168.21	56885456	2.55	MS2	32.17	721.432	2167.32	2168.22	5: Asp_GUC
Component	18051	28:U3-G9 = 2163.3299m	3-9	Ur-pCr-pCr-pAr-pAr-pUr-pGr	None		3.14	100	0	0	0	0	0	1	MS2	Automatic	32.45	720.105	-3	2163.34	2164.34	2163.33	0	unfold	unfold	11905953	11480628	5	11905953	3.14	MS2	32.45	720.105	2163.34	2164.34	11055304	3.93	MS2	32.45	720.106	2163.34	2164.14	32: Val_UAC
Component	18133	26:C24-G29 = 1811.2501m	24-29	Cr-pUr-pUr-pUr-pCr-pGr	None		3.63	98.8	0	0	0	0	0	1	MS2	Automatic	32.51	904.621	-2	1811.26	1811.98	1811.25	0	unfold	unfold	544746	507062	11	544746	3.63	MS2	32.51	904.621	1811.26	1811.98	469378	4.57	MS2	32.54	904.622	1811.26	1811.95	30: Trp_CCA
Component	18157	17:C25-G30 = 1878.3036m	25-30	Cr-pOr-pUr-pUr-pCr-pGr	None		2.99	98.1	0	0	0	0	0	1	MS2	Automatic	32.56	938.147	-2	1878.31	1879.11	1878.3	0	unfold	unfold	8264473	8109748	3	7955024	2.99	MS2	32.56	938.147	1878.31	1879.11	8264473	2.48	MS2	32.56	938.147	1878.31	1879.13	18: Lys_3UU
Component	18618	27:C65-G70 = 1808.2981m	65-70	Cr-pCr-pCr-pCr-pCr-pGr	None		2.97	100	0	0	0	0	0	1	MS2	Automatic	32.89	903.144	-2	1808.3	1809	1808.3	0	unfold	unfold	16748981	15971158	7	15193334	2.97	MS2	32.89	903.144	1808.3	1809	16748981	2.36	MS2	32.91	903.144	1808.3	1808.96	31: Tyr_GUA
Component	18773	23:C3-G9 = 2163.3299m	3-9	Cr-pAr-pAr-pCr-pUr-pUr-pGr	None		3.93	97.5	0	0	0	0	0	1	MS2	Automatic	33.08	720.106	-3	2163.34	2164.19	2163.33	0	unfold	unfold	54726664	53620572	3	54726664	3.93	MS2	33.08	720.106	2163.34	2164.19	52514480	4.15	MS2	33.06	720.106	2163.34	2164.19	25: Ser_IGA_1
Component	19627	24:A67-G73 = 2177.3455m	67-73	Am-pAr-pUr-pCr-pCr-pUr-pGr	None		2.66	100	0	0	0	0	0	1	MS2	Automatic	33.78	724.776	-3	2177.35	2178.26	2177.35	0	unfold	unfold	11435062	10746992	9	10058922	2.66	MS2	33.78	724.776	2177.35	2178.26	11435062	2.77	MS2	33.77	724.777	2177.35	2178.24	27: Ser_GCU
Component	19756	26:C24-G29 = 1811.2501m	24-29	Cr-pUr-pUr-pUr-pCr-pGr	None		2.48	99.7	0	0	0	0	0	1	MS2	Automatic	33.83	904.62	-2	1811.25	1811.98	1811.25	0	unfold	unfold	785557	760200	5	785557	2.48	MS2	33.83	904.62	1811.25	1811.98	734843	2.14	MS2	33.82	904.62	1811.25	1811.92	30: Trp_CCA
Component	20215	20:C69-A75 = 2097.3445m	69-75	Cr-pCr-pCr-pCr-pCr-pCr-pAr	None		2.68	100	0	0	0	0	0	1	MS2	Automatic	34.17	698.109	-3	2097.35	2098.23	2097.34	0	unfold	unfold	28048956	26571222	8	25093488	2.68	MS2	34.17	698.109	2097.35	2098.23	28048956	2.92	MS2	34.17	698.11	2097.35	2098.24	22: Pro_UGG
Component	20346	29:C19-G26 = 2484.4025m	19-26	Cr-pDr-pAr-pUr-pCr-pAr-pCr-pGm	None		1.82	99.9	0	0	0	0	0	1	MS2	Automatic	34.23	827.463	-3	2484.41	2485.41	2484.4	0	unfold	unfold	1107768	1050963	8	994157	1.82	MS2	34.23	827.463	2484.41	2485.41	1107768	1.13	MS2	34.23	827.128	2484.41	2485.42	33: Val_CAC
Component	20426	26:U68-A75 = 2429.3490m	68-75	Ur-pUr-pUr-pCr-pAr-pCr-pCr-pAr	None		2.85	100	0	0	0	0	0	1	MS2	Automatic	34.29	808.778	-3	2429.36	2430.35	2429.35	0	unfold	unfold	23375270	21327579	14	19279888	2.85	MS2	34.29	808.778	2429.36	2430.35	23375270	2.55	MS2	34.27	808.778	2429.36	2430.36	30: Trp_CCA
Component	20577	3:U1-G7 = 2116.2914m	1-7	Ur-pUr-pCr-pCr-pUr-pCr-pGr	None		2.57	100	0	0	0	0	0	1	MS2	Automatic	34.38	704.425	-3	2116.3	2117.16	2116.29	0	unfold	unfold	34550704	33156014	6	31761324	2.57	MS2	34.38	704.425	2116.3	2117.16	34550704	2.23	MS2	34.38	704.425	2116.3	2117.11	3: Arg_ICG
Component	20697	27:U37-G45 = 2867.4543m	37-45	Ur-pAr-pEr-pAr-pUr-pCr-pUr-pUr-pGr	None		3.16	100	0	0	0	0	0	1	MS2	Automatic	34.49	955.147	-3	2867.46	2868.73	2867.45	0	unfold	unfold	21434762	20490582	7	19546402	3.16	MS2	34.49	955.147	2867.46	2868.73	21434762	2.39	MS2	34.48	955.147	2867.46	2868.72	31: Tyr_GUA
Component	20746	29:A58-G64 = 2153.3343m	58-64	Am-pUr-pCr-pCr-pUr-pCr-pGr	None		2.01	100	0	0	0	0	0	1	MS2	Automatic	34.56	716.772	-3	2153.34	2154.14	2153.33	0	unfold	unfold	2448108	2332049	7	2215990	2.01	MS2	34.56	716.772	2153.34	2154.14	2448108	1.89	MS2	34.56	716.772	2153.34	2154.18	33: Val_CAC
Component	20844	26:C11-G18 = 2524.4086m	11-18	Cr-pUr-pCr-pAr-pAr-pDr-pGm-pGr	None		1.77	100	0	0	0	0	0	1	MS2	Automatic	34.57	840.464	-3	2524.41	2525.42	2524.41	1	unfold	unfold	20898692	19311881	12	17725070	1.77	MS2	34.57	840.464	2524.41	2525.42	20898692	1.77	MS2	34.56	840.464	2524.41	2525.47	30: Trp_CCA
Component	20905	23:A36-G45 = 3187.4953m	36-45	Ar-pEr-pAr-pUr-pCr-pUr-pUr-pUr-pUm-pGr	None		1.33	100	0	0	0	0	0	1	MS2	Automatic	34.65	1061.83	-3	3187.5	3188.89	3187.5	0	unfold	unfold	51365280	46564456	15	41763632	1.33	MS2	34.65	1061.83	3187.5	3188.89	51365280	1.79	MS2	34.66	1061.83	3187.5	3188.88	25: Ser_IGA_1
Component	21223	30:A69-A77 = 2804.4560m	69-77	Ar-pAr-pAr-pUr-pCr-pAr-pCr-pCr-pAr	None		3.16	100	0	0	0	0	0	1	MS2	Automatic	34.94	934.147	-3	2804.46	2805.68	2804.46	0	unfold	unfold	24115360	23355453	5	22595546	3.16	MS2	34.94	934.147	2804.46	2805.68	24115360	3.33	MS2	34.91	934.147	2804.47	2805.68	34: Val_AAC
Component	21386	30:A69-A77 = 2804.4560m	69-77	Ar-pAr-pAr-pUr-pCr-pAr-pCr-pCr-pAr	None		-1.11	100	0	0	0	0	0	1	MS2	Automatic	34.95	1401.22	-2	2804.45	2805.32	2804.46	0	unfold	unfold	3353003	2108128	84	3353003	-1.11	MS2	34.95	1401.22	2804.45	2805.32	863252	-0.33	MS2	35.02	1401.22	2804.46	2805.68	34: Val_AAC
Component	21433	19:A58-G65 = 2505.4140m	58-65	Am-pUr-pCr-pCr-pAr-pCr-pAr-pGr	None		2.64	99.4	0	0	0	0	0	1	MS2	Automatic	35.16	834.133	-3	2505.42	2506.44	2505.41	0	unfold	unfold	48994788	48115810	3	47236832	2.64	MS2	35.16	834.133	2505.42	2506.44	48994788	2.74	MS2	35.18	834.133	2505.42	2506.41	20: Phe_GAA_1
Component	21504	26:C24-G29 = 1811.2501m	24-29	Cr-pUr-pUr-pUr-pCr-pGr	None		1.74	99.9	0	0	0	0	0	1	MS2	Automatic	35.19	904.619	-2	1811.25	1812.03	1811.25	0	unfold	unfold	15036215	14618009	4	15036215	1.74	MS2	35.19	904.619	1811.25	1812.03	14199803	1.67	MS2	35.18	904.619	1811.25	1812.03	30: Trp_CCA
Component	21843	4:A2-G9 = 2468.3712m	2-9	Ar-pCr-pUr-pCr-pCr-pAr-pUr-pGr	None		2.64	100	0	0	0	0	0	1	MS2	Automatic	35.5	821.785	-3	2468.38	2469.44	2468.37	0	unfold	unfold	50292008	49879050	1	49466092	2.64	MS2	35.5	821.785	2468.38	2469.44	50292008	2.54	MS2	35.49	821.785	2468.38	2469.44	4: Asn_GUU
Component	21930	4:U36-G42 = 2309.3514m	36-42	Ur-pUr-pBr-pAr-pUr-pCr-pGr	None		2.18	0.1	0	0	0	0	0	1	MS2	Automatic	35.58	768.778	-3	2309.36	2310.32	2309.35	0	unfold	unfold	5393984	5391400	0	5388817	2.18	MS2	35.58	768.778	2309.36	2310.32	5393984	1.97	MS2	35.6	768.778	2309.36	2310.31	4: Asn_GUU
Component	22039	29:U2-G10 = 2812.4234m	2-10	Ur-pUr-pCr-pCr-pAr-pAr-pUr-pAr-pGm	None		3.03	99.9	0	0	0	0	0	1	MS2	Automatic	35.65	936.804	-3	2812.43	2813.68	2812.42	0	unfold	unfold	5950092	5947809	0	5950092	3.03	MS2	35.65	936.804	2812.43	2813.68	5945526	2.6	MS2	35.62	936.804	2812.43	2813.66	33: Val_CAC
Component	22492	4:U36-G42 = 2309.3514m	36-42	Ur-pUr-pBr-pAr-pUr-pCr-pGr	None		2.6	0.1	0	0	0	0	0	1	MS2	Automatic	35.99	768.779	-3	2309.36	2310.31	2309.35	0	unfold	unfold	31860576	29093152	13	26325728	2.6	MS2	35.99	768.779	2309.36	2310.31	31860576	2.6	MS2	35.99	768.779	2309.36	2310.31	4: Asn_GUU
Component	22753	3:U1-G7 = 2116.2914m(Na+)	1-7	Ur-pUr-pCr-pCr-pUr-pCr-pGr	Na+		-1.23	99.9	0	0	0	0	0	1	MS2	Automatic	36.28	711.75	-3	2138.27	2139.25	2138.27	0	unfold	unfold	1078090	1071284	1	1064478	-1.23	MS2	36.28	711.75	2138.27	2139.25	1078090	-0.88	MS2	36.26	711.75	2138.27	2139.22	3: Arg_ICG
Component	22803	3:U1-G7 = 2116.2914m	1-7	Ur-pUr-pCr-pCr-pUr-pCr-pGr	None		2.8	100	0	0	0	0	0	1	MS2	Automatic	36.34	704.425	-3	2116.3	2117.19	2116.29	0	unfold	unfold	13172986	12407172	9	11641359	2.8	MS2	36.34	704.425	2116.3	2117.19	13172986	2.57	MS2	36.31	704.425	2116.3	2117.19	3: Arg_ICG
Component	22964	25:C2-G9 = 2446.3280m	2-9	Cr-pUr-pUr-pCr-pUr-pAr-pUr-pGr	None		2.86	100	0	0	0	0	0	1	MS2	Automatic	36.42	814.77	-3	2446.34	2447.59	2446.33	0	unfold	unfold	36734444	34165510	11	31596576	2.86	MS2	36.42	814.77	2446.34	2447.59	36734444	2.86	MS2	36.41	814.438	2446.34	2447.38	29: Thr_AGU_2
Component	22983	14:C77-A85 = 2779.4607m	77-85	Cr-pAr-pAr-pCr-pCr-pAr-pCr-pCr-pAr	None		3.85	100	0	0	0	0	0	1	MS2	Automatic	36.48	925.816	-3	2779.47	2780.69	2779.46	0	unfold	unfold	31342200	28985358	11	26628516	3.85	MS2	36.48	925.816	2779.47	2780.69	31342200	3.32	MS2	36.45	925.816	2779.47	2780.68	15: Leu_CAA
Component	23678	10:U24-G32 = 2797.4237m	24-32	Ur-pAr-pCr-pAr-pCr-pAr-pUr-pCr-pGr	None		2.49	100	0	0	0	0	0	1	MS2	Automatic	37.17	931.804	-3	2797.43	2798.64	2797.42	0	unfold	unfold	16361876	13384917	31	10407958	2.49	MS2	37.17	931.804	2797.43	2798.64	16361876	2.84	MS2	37.12	931.804	2797.43	2798.62	11: His_GUG_2
Component	23743	7:A57-G64 = 2443.3759m	57-64	Ar-pCr-pUr-pCr-pCr-pCr-pCr-pGr	None		2.62	100	0	0	0	0	0	1	MS2	Automatic	37.16	813.453	-3	2443.38	2444.38	2443.38	0	unfold	unfold	45603740	44238906	4	45603740	2.62	MS2	37.16	813.453	2443.38	2444.38	42874072	2.42	MS2	37.12	813.453	2443.38	2444.38	7: Glu_UUC
Component	24194	7:C32-G40 = 2838.3835m	32-40	Cr-pUr-pKr-pUr-pCr-pAr-pCr-pCr-pGr	None		2.85	100	0	0	0	0	0	1	MS2	Automatic	37.46	945.456	-3	2838.39	2839.65	2838.38	0	unfold	unfold	40811160	39607742	4	38404324	2.85	MS2	37.46	945.456	2838.39	2839.65	40811160	2.76	MS2	37.44	945.456	2838.39	2839.66	7: Glu_UUC
Component	24452	19:A31-G42 = 4084.7022m	31-42	Ar-pCm-pUr-pGm-pAr-pAr-pYr-pAr-pUr-pCm-pUr-pGr	None		-0.36	98.9	0	0	0	0	0	1.1	MS2	Automatic	37.69	1360.89	-3	4084.7	4086.54	4084.7	1	unfold	unfold	41805248	40688576	4	39571904	-0.36	MS2	37.69	1360.89	4084.7	4086.54	41805248	0.12	MS2	37.67	1360.89	4084.7	4086.52	20: Phe_GAA_1
Component	24571	13:C77-A85 = 2733.4063m	77-85	Cr-pUr-pCr-pUr-pCr-pAr-pCr-pCr-pAr	None		2.12	100	0	0	0	0	0	1	Both	Automatic	37.86	682.346	-4	2733.41	2732.76	2733.41	0	unfold	unfold	1316547	1266846	6	1217144	2.12	Full	37.86	682.346	2733.41	2732.76	1316547	1.77	MS2	37.85	682.596	2733.41	2734.7	14: Leu_UAG
Component	24603	13:C77-A85 = 2733.4063m	77-85	Cr-pUr-pCr-pUr-pCr-pAr-pCr-pCr-pAr	None		5.25	100	0	0	0	0	0	1	MS2	Automatic	37.86	910.466	-3	2733.42	2734.59	2733.41	0	unfold	unfold	14032126	13278213	8	12524300	5.25	MS2	37.86	910.466	2733.42	2734.59	14032126	5.16	MS2	37.85	910.465	2733.42	2734.57	14: Leu_UAG
Component	24657	13:A44-G52 = 2775.3805m	44-52	Ar-pUr-pAr-pUr-pCr-pUr-pUr-pCr-pGr	None		5.5	100	0	0	0	0	0	1	MS2	Automatic	38.03	924.456	-3	2775.4	2776.61	2775.38	0	unfold	unfold	29063764	25187648	22	21311532	5.5	MS2	38.03	924.456	2775.4	2776.61	29063764	6.03	MS2	38.01	924.456	2775.4	2776.58	14: Leu_UAG
Component	25566	24:U48-G56 = 2752.3533m	48-56	Ur-pUr-pUr-pUr-pAr-pCr-pCr-pUr-pGr	None		5.77	100	0	0	0	0	0	1	MS2	Automatic	38.93	916.781	-3	2752.37	2753.58	2752.35	0	unfold	unfold	13120309	12997482	1	12874654	5.77	MS2	38.93	916.781	2752.37	2753.58	13120309	7.01	MS2	38.89	916.781	2752.37	2753.6	27: Ser_GCU
Component	25607	25:T54-G63 = 3131.4803m	54-63	Tr-pUr-pCr-pAr-pAm-pAr-pUr-pCr-pCr-pGr	None		3.02	99.8	0	0	0	0	0	1	MS2	Automatic	38.97	1042.82	-3	3131.49	3132.7	3131.48	0	unfold	unfold	971501	958605	2	945710	3.02	MS2	38.97	1042.82	3131.49	3132.7	971501	-4.08	MS2	38.94	1043.15	3131.47	3132.9	29: Thr_AGU_2
Component	25852	14:A67-G76 = 3104.4330m	67-76	Ar-pAr-pUr-pCr-pUr-pCr-pUr-pUr-pAr-pGr	None		2.86	100	0	0	0	0	0	1	MS2	Automatic	39.31	1034.14	-3	3104.44	3105.77	3104.43	0	unfold	unfold	92936824	89325244	6	92936824	2.86	MS2	39.31	1034.14	3104.44	3105.77	85713664	2.63	MS2	39.26	1034.14	3104.44	3105.77	15: Leu_CAA
Component	26218	25:T54-G63 = 3131.4803m	54-63	Tr-pUr-pCr-pAr-pAm-pAr-pUr-pCr-pCr-pGr	None		2.47	99.9	0	0	0	0	0	1	MS2	Automatic	39.87	1043.15	-3	3131.49	3132.84	3131.48	0	unfold	unfold	24964192	24608410	2	24252628	2.47	MS2	39.87	1043.15	3131.49	3132.84	24964192	2.71	MS2	39.83	1043.15	3131.49	3132.82	29: Thr_AGU_2
Component	26263	17:C60-G68 = 2749.4012m	60-68	Cr-pCr-pCr-pCr-pCr-pUr-pAr-pUr-pGr	None		3.96	100	0	0	0	0	0	1	MS2	Automatic	39.89	915.797	-3	2749.41	2750.61	2749.4	0	unfold	unfold	9309450	8635045	11	7960640	3.96	MS2	39.89	915.797	2749.41	2750.61	9309450	3.25	MS2	39.88	915.463	2749.41	2750.65	18: Lys_3UU
Component	26447	2:A57-G66 = 3091.4854m	57-66	Am-pCr-pCr-pCr-pCr-pCr-pAr-pUr-pCr-pGr	None		4.41	100	0	0	0	0	0	1	Both	Automatic	40.09	1029.83	-3	3091.5	3092.81	3091.49	0	unfold	unfold	187407	177763	8	168119	4.41	MS2	40.09	1029.83	3091.5	3092.81	187407	3.94	Full	40.06	1029.49	3091.5	3092.91	2: Arg_UCU
Component	26518	13:A67-G76 = 3117.4646m	67-76	Am-pAr-pUr-pCr-pCr-pCr-pUr-pUr-pAr-pGr	None		2.41	100	0	0	0	0	0	1	MS2	Automatic	40.19	1038.48	-3	3117.47	3118.84	3117.46	0	unfold	unfold	24539070	24247899	2	23956728	2.41	MS2	40.19	1038.48	3117.47	3118.84	24539070	3.04	MS2	40.18	1038.48	3117.47	3118.82	14: Leu_UAG
Component	26563	26:A30-G40 = 3459.5488m	30-40	Ar-pCm-pUr-pCm-pCr-pAr-pAr-pAr-pUr-pCr-pGr	None		-0.27	100	0	0	0	0	0	1	MS2	Automatic	40.19	1152.51	-3	3459.55	3461.01	3459.55	0	unfold	unfold	22973108	22620446	2	22973108	-0.27	MS2	40.19	1152.51	3459.55	3461.01	22267784	-0.13	MS2	40.18	1152.51	3459.55	3461.01	30: Trp_CCA
Component	26932	17:C60-G68 = 2749.4012m	60-68	Cr-pCr-pCr-pCr-pCr-pUr-pAr-pUr-pGr	None		1.83	100	0	0	0	0	0	1	MS2	Automatic	40.59	915.794	-3	2749.41	2750.91	2749.4	0	unfold	unfold	23494376	22353357	7	21212338	1.83	MS2	40.59	915.794	2749.41	2750.91	23494376	4.05	MS2	40.58	915.794	2749.41	2750.78	18: Lys_3UU
Component	27015	12:C32-G40 = 2943.4452m	32-40	Cr-pUr-pUr-pAr-pUr-pBr-pAr-pCr-pGr	None		3.6	4.9	0	0	0	0	0	1	MS2	Automatic	40.7	980.478	-3	2943.46	2944.73	2943.45	0	unfold	unfold	9428984	9075718	6	8722451	3.6	MS2	40.7	980.478	2943.46	2944.73	9428984	3.19	MS2	40.64	980.478	2943.45	2944.75	13: Ile_UAU
Component	27065	17:C32-G41 = 3313.4576m	32-41	Cr-pUr-pKr-pUr-pUr-pBr-pAr-pCr-pCr-pGr	None		1.16	33.6	0	0	0	0	0	1.1	MS2	Automatic	40.77	1103.81	-3	3313.46	3314.93	3313.46	0	unfold	unfold	6863798	6669098	4	6863798	1.16	MS2	40.77	1103.81	3313.46	3314.93	6474399	1.16	MS2	40.71	1103.81	3313.46	3314.94	18: Lys_3UU
Component	27364	16:C60-G69 = 3077.4697m	60-69	Cr-pCr-pCr-pCr-pCr-pUr-pAr-pCr-pAr-pGr	None		2.7	100	0	0	0	0	0	1	MS2	Automatic	41	1025.15	-3	3077.48	3078.79	3077.47	0	unfold	unfold	37747876	36991528	3	37747876	2.7	MS2	41	1025.15	3077.48	3078.79	36235180	3.57	MS2	40.98	1025.15	3077.48	3078.8	17: Lys_CUU
Component	27663	8:D19-G30 = 3786.5969m	19-30	Dr-pAr-pAr-pAr-pAr-pUr-pCr-pCr-pAr-pAr-pCr-pGr	None		0.33	100	0	0	0	0	0	1	MS2	Automatic	41.36	1261.53	-3	3786.6	3788.17	3786.6	0	unfold	unfold	83883304	80567712	6	77252120	0.33	MS2	41.36	1261.53	3786.6	3788.17	83883304	0.33	MS2	41.34	1261.53	3786.6	3788.17	8: Gly_GCC
Component	27901	26:T53-G63 = 3414.4784m	53-63	Tr-pUr-pCr-pAr-pAm-pUr-pUr-pCr-pCr-pUr-pGr	None		0.61	100	0	0	0	0	0	1	MS2	Automatic	41.59	1137.49	-3	3414.48	3415.67	3414.48	0	unfold	unfold	1170052	1050254	16	930455	0.61	MS2	41.59	1137.49	3414.48	3415.67	1170052	0.4	MS2	41.55	1137.49	3414.48	3415.93	30: Trp_CCA
Component	27953	29:C30-G39 = 3078.4537m	30-39	Cr-pCr-pUr-pUr-pCr-pAr-pCr-pAr-pCr-pGr	None		3.76	99.7	0	0	0	0	0	1	MS2	Automatic	41.67	1025.48	-3	3078.47	3080.36	3078.45	0	unfold	unfold	1681163	1604372	7	1527580	3.76	MS2	41.67	1025.48	3078.47	3080.36	1681163	3.76	MS2	41.62	1025.81	3078.47	3080.47	33: Val_CAC
Component	28024	2:A57-G66 = 3091.4854m	57-66	Am-pCr-pCr-pCr-pCr-pCr-pAr-pUr-pCr-pGr	None		2.6	100	0	0	0	0	0	1	MS2	Automatic	41.72	1029.82	-3	3091.49	3092.82	3091.49	0	unfold	unfold	46597596	44575274	6	42552952	2.6	MS2	41.72	1029.82	3091.49	3092.82	46597596	2.83	MS2	41.7	1029.82	3091.49	3092.82	2: Arg_UCU
Component	28582	28:C31-G40 = 3136.4592m	31-40	Cr-pCr-pUr-pUr-pLr-pAr-pCr-pAr-pCr-pGr	None		1.95	100	0	0	0	0	0	1	MS2	Automatic	42.46	1044.82	-3	3136.47	3137.79	3136.46	0	unfold	unfold	1696221	1545717	14	1696221	1.95	MS2	42.46	1044.82	3136.47	3137.79	1395213	1.95	MS2	42.44	1044.82	3136.47	3137.74	32: Val_UAC
Component	28644	26:T53-G63 = 3414.4784m	53-63	Tr-pUr-pCr-pAr-pAm-pUr-pUr-pCr-pCr-pUr-pGr	None		1.61	100	0	0	0	0	0	0	Full	Automatic	42.57	568.407	-6	3414.48	3417.31	3414.48	0	unfold	unfold	1796336	1462084	32	1127830	1.61	Full	42.57	568.407	3414.48	3417.31	1796336	1.04	Full	42.55	568.24	3414.48	3416.95	30: Trp_CCA
Component	28665	26:T53-G63 = 3414.4784m	53-63	Tr-pUr-pCr-pAr-pAm-pUr-pUr-pCr-pCr-pUr-pGr	None		-0.03	100	0	0	0	0	0	1	MS2	Automatic	42.57	1137.49	-3	3414.48	3415.92	3414.48	0	unfold	unfold	61890044	57795036	10	53700028	-0.03	MS2	42.57	1137.49	3414.48	3415.92	61890044	0.33	MS2	42.55	1137.49	3414.48	3415.92	30: Trp_CCA
Component	28794	2:A57-G66 = 3091.4854m	57-66	Am-pCr-pCr-pCr-pCr-pCr-pAr-pUr-pCr-pGr	None		2.6	100	0	0	0	0	0	1	Both	Automatic	42.76	1029.82	-3	3091.49	3092.55	3091.49	0	unfold	unfold	552774	381329	64	209884	2.6	Full	42.76	1029.82	3091.49	3092.55	552774	2.05	MS2	42.78	1029.82	3091.49	3092.81	2: Arg_UCU
Component	29094	16:C60-G69 = 3077.4697m	60-69	Cr-pCr-pCr-pCr-pCr-pUr-pAr-pCr-pAr-pGr	None		2.38	100	0	0	0	0	0	1	MS2	Automatic	43.19	1025.15	-3	3077.48	3078.77	3077.47	0	unfold	unfold	1094783	779263	57	463743	2.38	MS2	43.19	1025.15	3077.48	3078.77	1094783	1.9	MS2	43.27	1025.15	3077.48	3078.78	17: Lys_CUU
Component	29140	20:T53-G64 = 3742.5469m	53-64	Tr-pUr-pCr-pAr-pAm-pUr-pUr-pCr-pCr-pCr-pAr-pGr	None		0.39	100	0	0	0	0	0	1	MS2	Automatic	43.57	1246.84	-3	3742.55	3744.06	3742.55	0	unfold	unfold	6259194	5701991	14	5144788	0.39	MS2	43.57	1246.84	3742.55	3744.06	6259194	0.91	MS2	43.52	1246.84	3742.55	3744.14	22: Pro_UGG
Component	29236	2:A30-G41 = 3955.5854m	30-41	Ar-pCr-pUr-pJr-pCr-pUr-pBr-pAr-pUr-pCr-pAr-pGr	None		0.37	99.9	0	0	0	0	0	1	MS2	Automatic	43.57	1317.86	-3	3955.59	3957.32	3955.59	0	unfold	unfold	24427970	22653189	11	20878408	0.37	MS2	43.57	1317.86	3955.59	3957.32	24427970	0.25	MS2	43.62	1317.86	3955.59	3957.35	2: Arg_UCU
Component	29266	14:A32-G43 = 3805.5802m	32-43	Ar-pUr-pUr-pCm-pAr-pAr-pGm-pCr-pUr-pCr-pAr-pGr	None		0.98	100	0	0	0	0	0	1	MS2	Automatic	43.51	1267.86	-3	3805.58	3807.28	3805.58	1	unfold	unfold	1919214	1567769	32	1216323	0.98	MS2	43.51	1267.86	3805.58	3807.28	1919214	0.47	MS2	43.46	1267.85	3805.58	3807.27	15: Leu_CAA
Component	29351	15:C76-A87 = 3673.5254m	76-87	Cr-pAr-pUr-pCr-pCr-pUr-pUr-pCr-pAr-pCr-pCr-pAr	None		1.85	100	0	0	0	0	0	1	MS2	Automatic	43.62	1223.84	-3	3673.53	3675.07	3673.53	0	unfold	unfold	20591556	19796479	6	19001402	1.85	MS2	43.62	1223.84	3673.53	3675.07	20591556	1.32	MS2	43.61	1223.84	3673.53	3675.07	16: Leu_UAA
Component	29380	2:A30-G41 = 3955.5854m	30-41	Ar-pCr-pUr-pJr-pCr-pUr-pBr-pAr-pUr-pCr-pAr-pGr	None		0.37	99.9	0	0	0	0	0	1	MS2	Automatic	43.57	1317.86	-3	3955.59	3957.33	3955.59	0	unfold	unfold	24868694	24835137	0	24868694	0.37	MS2	43.57	1317.86	3955.59	3957.33	24801580	0.25	MS2	43.62	1317.86	3955.59	3957.34	2: Arg_UCU
Component	29660	15:C76-A87 = 3673.5254m	76-87	Cr-pAr-pUr-pCr-pCr-pUr-pUr-pCr-pAr-pCr-pCr-pAr	None		0.39	100	0	0	0	0	0	1	MS2	Automatic	43.83	1223.5	-3	3673.53	3675.2	3673.53	0	unfold	unfold	285979	276110	5	285979	0.39	MS2	43.83	1223.5	3673.53	3675.2	266240	0.66	MS2	43.81	1223.5	3673.53	3675.17	16: Leu_UAA
Component	29774	9:U64-A75 = 3712.5475m	64-75	Ur-pAr-pCr-pCr-pGr-pCr-pUr-pCr-pAr-pCr-pCr-pAr	None		1.53	97.2	0	0	0	0	0	1	Both	Automatic	44	927.633	-4	3712.55	3714.4	3712.55	1	unfold	unfold	733485	483318	73	233150	1.53	Full	44	927.633	3712.55	3714.4	733485	2.84	MS2	43.96	927.383	3712.56	3714.17	9: Gly_UCC
Component	30217	5:T53-G64 = 3704.5200m	53-64	Tr-pUr-pCr-pAr-pAr-pUr-pUr-pCr-pCr-pCr-pCr-pGr	None		0.4	100	0	0	0	0	0	1	MS2	Automatic	45.08	1234.17	-3	3704.52	3706.07	3704.52	0	unfold	unfold	12126882	11698798	5	12126882	0.4	MS2	45.08	1234.17	3704.52	3706.07	11270714	0.4	MS2	44.97	1234.17	3704.52	3706.17	5: Asp_GUC
Component	30233	5:T53-G64 = 3704.5200m	53-64	Tr-pUr-pCr-pAr-pAr-pUr-pUr-pCr-pCr-pCr-pCr-pGr	None		0.4	100	0	0	0	0	0	1	MS2	Automatic	45.08	1234.17	-3	3704.52	3706.08	3704.52	0	unfold	unfold	12055010	11605120	5	12055010	0.4	MS2	45.08	1234.17	3704.52	3706.08	11155229	0.4	MS2	44.97	1234.17	3704.52	3706.17	5: Asp_GUC
Component	30633	7:C19-G31 = 4044.5997m	19-31	Cr-pDr-pAr-pUr-pCr-pAr-pCr-pAr-pUr-pCr-pAr-pCr-pGr	None		3.23	100	0	0	0	0	0	1	MS2	Automatic	45.51	1010.4	-4	4044.61	4046.39	4044.6	0	unfold	unfold	82892240	76802512	11	70712784	3.23	MS2	45.51	1010.4	4044.61	4046.39	82892240	3.83	MS2	45.46	1010.4	4044.62	4046.39	7: Glu_UUC
Component	30921	31:C31-G42 = 3858.5691m	31-42	Cr-pUr-pCr-pAr-pUr-pBr-pAr-pCr-pCr-pCr-pUr-pGr	None		4.12	99.8	0	0	0	0	0	1	MS2	Automatic	45.92	963.889	-4	3858.59	3860.29	3858.57	0	unfold	unfold	11143191	10818628	4	10494066	4.12	MS2	45.92	963.889	3858.59	3860.29	11143191	3.93	MS2	45.91	963.888	3858.58	3860.29	35: Ini_CAU
Component	31515	4:T55-G68 = 4352.6295m	55-68	Tr-pUr-pCr-pAr-pAm-pCr-pCr-pCr-pUr-pCr-pAr-pCr-pUr-pGr	None		0.44	100	0	0	0	0	0	1	MS2	Automatic	46.85	1087.4	-4	4352.63	4354.5	4352.63	0	unfold	unfold	811497	766116	8	720736	0.44	MS2	46.85	1087.4	4352.63	4354.5	811497	-0.35	MS2	46.82	1087.4	4352.63	4354.5	4: Asn_GUU
Component	31677	18:U31-G42 = 3860.5371m	31-42	Ur-pCr-pUr-pCr-pAr-pUr-pBr-pAr-pUr-pCr-pUr-pGr	None		1.58	100	0	0	0	0	0	1	MS2	Automatic	47.3	771.302	-5	3860.54	3862.17	3860.54	0	unfold	unfold	379227	312484	30	245740	1.58	MS2	47.3	771.302	3860.54	3862.17	379227	1.84	MS2	47.26	771.302	3860.54	3861.91	19: Met_CAU
Component	31768	18:U31-G42 = 3860.5371m	31-42	Ur-pCr-pUr-pCr-pAr-pUr-pBr-pAr-pUr-pCr-pUr-pGr	None		5.38	100	0	0	0	0	0	1	MS2	Automatic	47.3	964.382	-4	3860.56	3862.26	3860.54	0	unfold	unfold	34587208	31238821	15	27890434	5.38	MS2	47.3	964.382	3860.56	3862.26	34587208	5.95	MS2	47.25	964.382	3860.56	3862.24	19: Met_CAU
Component	31906	4:T55-G68 = 4352.6295m	55-68	Tr-pUr-pCr-pAr-pAm-pCr-pCr-pCr-pUr-pCr-pAr-pCr-pUr-pGr	None		0.66	100	0	0	0	0	0	1	MS2	Automatic	47.5	1087.4	-4	4352.63	4354.52	4352.63	0	unfold	unfold	72227712	70592864	3	72227712	0.66	MS2	47.5	1087.4	4352.63	4354.52	68958016	0.55	MS2	47.5	1087.4	4352.63	4354.51	4: Asn_GUU
Component	32132	8:D19-G33 = 4743.6949m	19-33	Dr-pAr-pAr-pAr-pAr-pUr-pCr-pCr-pAr-pAr-pCr-pGr-pUr-pUr-pGr	None		0.18	100	0	0	0	0	0	1	MS2	Automatic	47.84	1185.42	-4	4743.7	4745.63	4743.69	1	unfold	unfold	1585717	1329528	27	1073339	0.18	MS2	47.84	1185.42	4743.7	4745.63	1585717	-0.02	MS2	47.81	1185.42	4743.69	4745.94	8: Gly_GCC
Component	32459	16:A31-G45 = 4847.6947m	31-45	Ar-pCr-pUr-pCr-pUr-pUr-pBr-pAr-pUr-pCr-pAr-pUr-pAr-pAr-pGr	None		0.23	100	0	0	0	0	0	1	MS2	Automatic	48.27	1211.17	-4	4847.7	4849.76	4847.69	0	unfold	unfold	54410800	54393272	0	54375744	0.23	MS2	48.27	1211.17	4847.7	4849.76	54410800	0.64	MS2	48.21	1211.42	4847.7	4849.77	17: Lys_CUU
Component	33191	12:T54-G69 = 4962.7120m	54-69	Tr-pUr-pCr-pAr-pAm-pUr-pCr-pCr-pCr-pCr-pAr-pCr-pCr-pUr-pCr-pGr	None		1.06	100	0	0	0	0	0	1	MS2	Automatic	50.45	1240.17	-4	4962.72	4964.8	4962.71	0	unfold	unfold	684619	682553	0	684619	1.06	MS2	50.45	1240.17	4962.72	4964.8	680486	0.47	MS2	50.44	1240.17	4962.71	4964.83	13: Ile_UAU
Component	33473	12:T54-G69 = 4962.7120m	54-69	Tr-pUr-pCr-pAr-pAm-pUr-pCr-pCr-pCr-pCr-pAr-pCr-pCr-pUr-pCr-pGr	None		0.37	100	0	0	0	0	0	1	MS2	Automatic	51	1240.17	-4	4962.71	4964.91	4962.71	0	unfold	unfold	7254410	7157102	2	7254410	0.37	MS2	51	1240.17	4962.71	4964.91	7059793	0.86	MS2	51.02	1240.17	4962.72	4964.91	13: Ile_UAU
Component	23955	10:C3-G11 = 2788.4121m	3-11	Cr-pCr-pAm-pUr-pCr-pUr-pUr-pAr-pGr	None		5.07	100	0	0	0	0	0	1	MS2	Automatic	37.32	928.801	-3	2788.43	2789.64	2788.41	0	unfolded	unfolded	25831652	25687960	1	25544268	5.07	MS2	37.32	928.801	2788.43	2789.64	25831652	5.77	MS2	37.29	928.801	2788.43	2789.64	11: His_GUG_2

## Sheet: Table S2
Table S2: Unique oligonucleotide digestion products detected in folded S. cerevisiae total tRNA RNase T1 digestion
Level	No.	Identification	Positions	Oligo Sequence	Mod	Site	∆ ppm	Conf. Score	Seq Length	Nonunique Seq	Isomer Group	Num of Iso Seq	Digest position	Best ASR	ID Type	Integration Type	RT	M/Z	Charge St.	Mono Mass Exp.	Avg Mass Exp.	Mono Mass Theo.	Missed Cleavages	Max Cond.	Min Cond.	Max MS Area	Avg MS Area: folded	%CV: folded	MS Area:2023_0221_folded_SC_tRNA_RT1_CIP_45mgmL_1.raw	∆ ppm:2023_0221_folded_SC_tRNA_RT1_CIP_45mgmL_1.raw	ID Type:2023_0221_folded_SC_tRNA_RT1_CIP_45mgmL_1.raw	RT:2023_0221_folded_SC_tRNA_RT1_CIP_45mgmL_1.raw	M/Z:2023_0221_folded_SC_tRNA_RT1_CIP_45mgmL_1.raw	Mono Mass Exp.:2023_0221_folded_SC_tRNA_RT1_CIP_45mgmL_1.raw	Avg Mass Exp.:2023_0221_folded_SC_tRNA_RT1_CIP_45mgmL_1.raw	MS Area:2023_0221_folded_SC_tRNA_RT1_CIP_45mgmL_2.raw	∆ ppm:2023_0221_folded_SC_tRNA_RT1_CIP_45mgmL_2.raw	ID Type:2023_0221_folded_SC_tRNA_RT1_CIP_45mgmL_2.raw	RT:2023_0221_folded_SC_tRNA_RT1_CIP_45mgmL_2.raw	M/Z:2023_0221_folded_SC_tRNA_RT1_CIP_45mgmL_2.raw	Mono Mass Exp.:2023_0221_folded_SC_tRNA_RT1_CIP_45mgmL_2.raw	Avg Mass Exp.:2023_0221_folded_SC_tRNA_RT1_CIP_45mgmL_2.raw	Oligo	Comment
Component	899	17:U7-G10 = 1238.2104m	7-10	Ur-pUr-pAr-pGm	None		1.68	93.4	0	0	0	0	0	1	MS2	Automatic	18.81	618.099	-2	1238.21	1238.71	1238.21	0	folded	folded	152912	140713	12	128514	1.68	MS2	18.81	618.099	1238.21	1238.71	152912	1.39	MS2	18.82	618.099	1238.21	1238.77	18: Lys_3UU
Component	1802	27:A75-A78 = 1206.2318m	75-78	Ar-pCr-pCr-pAr	None		2.1	99.9	0	0	0	0	0	1	MS2	Automatic	20.35	602.11	-2	1206.23	1206.71	1206.23	0	folded	folded	1228548	1178018	6	1127488	2.1	MS2	20.35	602.11	1206.23	1206.71	1228548	1.79	MS2	20.34	602.11	1206.23	1206.72	31: Tyr_GUA
Component	1951	20:D19-G22 = 1226.2104m	19-22	Dr-pAr-pUr-pGr	None		0.5	99.7	0	0	0	0	0	1	MS2	Automatic	20.92	612.098	-2	1226.21	1226.68	1226.21	0	folded	folded	1724646	1573469	14	1422291	0.5	MS2	20.92	612.098	1226.21	1226.68	1724646	0.7	MS2	20.92	612.098	1226.21	1226.68	22: Pro_UGG
Component	2352	4:C43-G46 = 1246.2380m	43-46	Cr-pAr-pAr-pGr	None		1.8	99.8	0	0	0	0	0	1	MS2	Automatic	21.34	622.113	-2	1246.24	1246.76	1246.24	0	folded	folded	3301011	3214830	4	3128650	1.8	MS2	21.34	622.113	1246.24	1246.76	3301011	1.8	MS2	21.33	622.113	1246.24	1246.76	4: Asn_GUU
Component	2442	27:D16-G19 = 1258.2367m	16-19	Dr-pDr-pGm-pGr	None		1.87	99.6	0	0	0	0	0	1	MS2	Automatic	21.5	628.112	-2	1258.24	1258.75	1258.24	1	folded	folded	3086434	3057898	1	3086434	1.87	MS2	21.5	628.112	1258.24	1258.75	3029363	1.78	MS2	21.5	628.112	1258.24	1258.73	31: Tyr_GUA
Component	2492	5:D19-G22 = 1225.2264m	19-22	Dr-pCr-pAr-pGr	None		1.71	98.3	0	0	0	0	0	1	MS2	Automatic	21.66	611.607	-2	1225.23	1225.68	1225.23	0	folded	folded	2738464	2734594	0	2730724	1.71	MS2	21.66	611.607	1225.23	1225.68	2738464	1.9	MS2	21.67	611.607	1225.23	1225.72	5: Asp_GUC
Component	2513	5:A46-G49 = 1237.2264m	46-49	Ar-pUr-pCm-pGr	None		1.1	98.7	0	0	0	0	0	1	MS2	Automatic	21.68	617.607	-2	1237.23	1237.59	1237.23	0	folded	folded	431792	425856	2	419921	1.1	MS2	21.68	617.607	1237.23	1237.59	431792	1.1	MS2	21.68	617.607	1237.23	1237.58	5: Asp_GUC
Component	3194	5:C42-G45 = 1222.2268m	42-45	Cr-pCr-pAr-pGr	None		-0.26	93	0	0	0	0	0	1	MS2	Automatic	22.89	610.106	-2	1222.23	1222.71	1222.23	0	folded	folded	5336826	5266554	2	5336826	-0.26	MS2	22.89	610.106	1222.23	1222.71	5196284	-0.16	MS2	22.9	610.106	1222.23	1222.7	5: Asp_GUC
Component	4904	10:U12-G16 = 1553.2473m	12-16	Ur-pAr-pUr-pAr-pGr	None		2.6	94.4	0	0	0	0	0	1	MS2	Automatic	24.6	775.618	-2	1553.25	1554.02	1553.25	0	folded	folded	11682541	11463394	3	11244248	2.6	MS2	24.6	775.618	1553.25	1554.02	11682541	2.28	MS2	24.62	775.618	1553.25	1554.01	11: His_GUG_2
Component	5042	11:A47-G51 = 1568.2946m	47-51	Ar-pDr-pCm-pAr-pGr	None		1.76	97.4	0	0	0	0	0	1	MS2	Automatic	24.79	783.141	-2	1568.3	1568.89	1568.29	0	folded	folded	2031566	2003054	2	1974543	1.76	MS2	24.79	783.141	1568.3	1568.89	2031566	1.76	MS2	24.76	783.141	1568.3	1568.87	12: Ile_AAU
Component	5332	29:C41-G45 = 1575.2905m	41-45	Cr-pAr-pAr-pAr-pGr	None		2.26	94.2	0	0	0	0	0	1	MS2	Automatic	25.02	786.64	-2	1575.29	1575.88	1575.29	0	folded	folded	332157	321507	5	310857	2.26	MS2	25.02	786.64	1575.29	1575.88	332157	2.18	MS2	25	786.64	1575.29	1575.88	33: Val_CAC
Component	5582	24:C41-G45 = 1543.2517m	41-45	Cr-pAr-pUr-pUm-pGr	None		1.41	99.6	0	0	0	0	0	1	MS2	Automatic	25.31	770.62	-2	1543.25	1543.88	1543.25	0	folded	folded	1812529	1758208	4	1812529	1.41	MS2	25.31	770.62	1543.25	1543.88	1703886	1.41	MS2	25.26	770.62	1543.25	1543.85	27: Ser_GCU
Component	6031	10:U12-G16 = 1553.2473m	12-16	Ur-pAr-pUr-pAr-pGr	None		2.75	99.4	0	0	0	0	0	1	MS2	Automatic	25.76	775.619	-2	1553.25	1553.84	1553.25	0	folded	folded	2151371	2149412	0	2147452	2.75	MS2	25.76	775.619	1553.25	1553.84	2151371	2.52	MS2	25.74	775.618	1553.25	1553.84	11: His_GUG_2
Component	6649	22:A31-G35 = 1600.2732m	31-35	Ar-pCm-pUr-pLr-pGr	None		2.37	99	0	0	0	0	0	1	MS2	Automatic	26.46	799.131	-2	1600.28	1600.87	1600.27	0	folded	folded	844980	790491	10	736002	2.37	MS2	26.46	799.131	1600.28	1600.87	844980	2.82	MS2	26.45	799.132	1600.28	1600.87	24: Ser_UGA
Component	7168	30:U3-G7 = 1506.2089m	3-7	Ur-pUr-pUr-pCr-pGr	None		2.6	100	0	0	0	0	0	1	MS2	Automatic	27.08	752.099	-2	1506.21	1506.79	1506.21	0	folded	folded	13134617	12840144	3	13134617	2.6	MS2	27.08	752.099	1506.21	1506.79	12545670	2.92	MS2	27.07	752.099	1506.21	1506.79	34: Val_AAC
Component	7243	19:A5-G10 = 1873.2883m	5-10	Ar-pUr-pUr-pUr-pAr-pGm	None		2.51	97.2	0	0	0	0	0	1	MS2	Automatic	27.15	935.639	-2	1873.29	1874.1	1873.29	0	folded	folded	3224106	3193882	1	3163657	2.51	MS2	27.15	935.639	1873.29	1874.1	3224106	2.51	MS2	27.12	935.639	1873.29	1874.1	20: Phe_GAA_1
Component	7508	7:U13-G17 = 1552.2633m	13-17	Ur-pAr-pAr-pCr-pGr	None		1.5	96.2	0	0	0	0	0	1	MS2	Automatic	27.52	775.126	-2	1552.27	1552.85	1552.26	0	folded	folded	2309981	2229220	5	2309981	1.5	MS2	27.52	775.126	1552.27	1552.85	2148458	1.66	MS2	27.52	775.126	1552.27	1552.85	7: Glu_UUC
Component	7517	20:C30-G34 = 1506.2089m	30-34	Cr-pUr-pUr-pUr-pGr	None		3.16	99.3	0	0	0	0	0	1	MS2	Automatic	27.56	752.1	-2	1506.21	1506.79	1506.21	0	folded	folded	2542183	2394489	9	2246795	3.16	MS2	27.56	752.1	1506.21	1506.79	2542183	3.32	MS2	27.53	752.1	1506.21	1506.79	22: Pro_UGG
Component	7667	11:C26-G30 = 1527.2680m	26-30	Cr-pAr-pCr-pCr-pGr	None		2.33	100	0	0	0	0	0	1	MS2	Automatic	27.79	762.629	-2	1527.27	1527.84	1527.27	0	folded	folded	9076065	8998324	1	9076065	2.33	MS2	27.79	762.629	1527.27	1527.84	8920583	2.09	MS2	27.79	762.628	1527.27	1527.82	12: Ile_AAU
Component	7735	23:C25-G30 = 1948.3692m	25-30	Cr-pOr-pAr-pAr-pAr-pGr	None		2.01	91.1	0	0	0	0	0	1	MS2	Automatic	27.81	973.179	-2	1948.37	1949.21	1948.37	0	folded	folded	872886	779470	17	686054	2.01	MS2	27.81	973.179	1948.37	1949.21	872886	2.01	MS2	27.82	973.179	1948.37	1949.2	25: Ser_IGA_1
Component	7773	7:A5-G10 = 1882.2998m	5-10	Ar-pUr-pAr-pUr-pAr-pGr	None		2.71	100	0	0	0	0	0	1	MS2	Automatic	27.9	940.145	-2	1882.3	1882.98	1882.3	0	folded	folded	4057558	3834512	8	3611466	2.71	MS2	27.9	940.145	1882.3	1882.98	4057558	2.39	MS2	27.89	940.145	1882.3	1883.03	7: Glu_UUC
Component	8383	24:C35-G39 = 1697.3008m	35-39	Cr-pUr-pBr-pAr-pGr	None		2.43	0	0	0	0	0	0	1	MS2	Automatic	28.69	847.645	-2	1697.3	1698.05	1697.3	0	folded	folded	1168061	1095555	9	1168061	2.43	MS2	28.69	847.645	1697.3	1698.05	1023049	2.36	MS2	28.7	847.645	1697.3	1698.07	27: Ser_GCU
Component	9362	19:A66-G71 = 1858.2886m	66-71	Ar-pAr-pUr-pUr-pCr-pGr	None		2.75	100	0	0	0	0	0	1	MS2	Automatic	29.36	928.14	-2	1858.29	1859.08	1858.29	0	folded	folded	3307122	3066442	11	3307122	2.75	MS2	29.36	928.14	1858.29	1859.08	2825762	2.75	MS2	29.34	928.14	1858.29	1859.11	20: Phe_GAA_1
Component	9427	25:U36-G40 = 1698.2848m	36-40	Ur-pBr-pAr-pUr-pGr	None		2.43	0.1	0	0	0	0	0	1	MS2	Automatic	29.42	848.137	-2	1698.29	1698.93	1698.28	0	folded	folded	1171586	1045731	17	1171586	2.43	MS2	29.42	848.137	1698.29	1698.93	919876	2.5	MS2	29.4	848.137	1698.29	1698.92	29: Thr_AGU_2
Component	9539	3:T54-G59 = 1886.3199m	54-59	Tr-pUr-pCr-pAr-pAm-pGr	None		2.1	91.4	0	0	0	0	0	1	MS2	Automatic	29.51	942.155	-2	1886.32	1887.11	1886.32	0	folded	folded	728607	690291	8	728607	2.1	MS2	29.51	942.155	1886.32	1887.11	651976	2.16	MS2	29.53	942.155	1886.32	1887.05	3: Arg_ICG
Component	9692	16:C13-G18 = 1859.3202m	13-18	Cr-pAr-pAr-pDr-pCr-pGr	None		1.42	99.6	0	0	0	0	0	1	MS2	Automatic	29.69	618.767	-3	1859.32	1860.12	1859.32	0	folded	folded	630174	582620	12	535066	1.42	MS2	29.69	618.767	1859.32	1860.12	630174	1.03	MS2	29.69	618.767	1859.32	1860.1	17: Lys_CUU
Component	9813	25:U36-G40 = 1698.2848m	36-40	Ur-pBr-pAr-pUr-pGr	None		2.28	0.1	0	0	0	0	0	1	MS2	Automatic	29.82	848.137	-2	1698.29	1699.04	1698.28	0	folded	folded	4010838	3876326	5	4010838	2.28	MS2	29.82	848.137	1698.29	1699.04	3741815	2	MS2	29.82	848.137	1698.29	1698.92	29: Thr_AGU_2
Component	9827	13:A32-G37 = 1859.2726m	32-37	Ar-pUr-pUr-pUr-pAr-pGr	None		3.66	99.9	0	0	0	0	0	1	MS2	Automatic	29.83	928.632	-2	1859.28	1860.07	1859.27	0	folded	folded	5417578	5249804	5	5417578	3.66	MS2	29.83	928.632	1859.28	1860.07	5082029	4.58	MS2	29.83	928.633	1859.28	1860.08	14: Leu_UAG
Component	10103	16:C25-G30 = 1902.3148m	25-30	Cr-pOr-pUr-pAr-pUr-pGr	None		2.51	98.5	0	0	0	0	0	1	MS2	Automatic	30.17	950.153	-2	1902.32	1903.14	1902.31	0	folded	folded	3176217	3127606	2	3176217	2.51	MS2	30.17	950.153	1902.32	1903.14	3078994	1.86	MS2	30.18	950.152	1902.32	1903.2	17: Lys_CUU
Component	10289	31:A57-G62 = 1894.3474m	57-62	Am-pAr-pAr-pCr-pCr-pGr	None		2.36	97.8	0	0	0	0	0	1	MS2	Automatic	30.35	946.169	-2	1894.35	1895.17	1894.35	0	folded	folded	927915	925719	0	927915	2.36	MS2	30.35	946.169	1894.35	1895.17	923522	2.17	MS2	30.37	946.169	1894.35	1895.13	35: Ini_CAU
Component	10450	29:A70-A76 = 2169.3782m	70-76	Ar-pAr-pCr-pAr-pCr-pCr-pAr	None		2.14	99.9	0	0	0	0	0	1	MS2	Automatic	30.53	722.12	-3	2169.38	2170.34	2169.38	0	folded	folded	619810	525423	25	431035	2.14	MS2	30.53	722.12	2169.38	2170.34	619810	2.25	MS2	30.55	722.12	2169.38	2170.32	33: Val_CAC
Component	10456	28:A47-G52 = 1849.3246m	47-52	Ar-pDr-pCr-pCm-pCr-pGr	None		2.28	99.8	0	0	0	0	0	1	Both	Automatic	30.55	923.657	-2	1849.33	1850.07	1849.32	0	folded	folded	485096	471600	4	485096	2.28	Full	30.55	923.657	1849.33	1850.07	458103	2.14	MS2	30.56	923.657	1849.33	1850	32: Val_UAC
Component	10837	28:A71-A77 = 2146.3510m	71-77	Ar-pUr-pCr-pAr-pCr-pCr-pAr	None		2.33	99.7	0	0	0	0	0	1	MS2	Automatic	31.05	714.445	-3	2146.36	2147.27	2146.35	0	folded	folded	3977691	3967788	0	3977691	2.33	MS2	31.05	714.445	2146.36	2147.27	3957885	2.33	MS2	31.06	714.445	2146.36	2147.25	32: Val_UAC
Component	10956	26:C24-G29 = 1811.2501m	24-29	Cr-pUr-pUr-pUr-pCr-pGr	None		2.48	91.7	0	0	0	0	0	1	MS2	Automatic	31.27	904.62	-2	1811.25	1811.87	1811.25	0	folded	folded	515436	514349	0	515436	2.48	MS2	31.27	904.62	1811.25	1811.87	513261	2.28	MS2	31.27	904.62	1811.25	1812.08	30: Trp_CCA
Component	10965	6:C34-G41 = 2560.4450m	34-41	Cr-pAr-pEr-pAr-pUr-pCr-pUr-pGr	None		2.22	100	0	0	0	0	0	1	MS2	Automatic	31.29	852.81	-3	2560.45	2561.51	2560.45	0	folded	folded	2691464	2574632	6	2691464	2.22	MS2	31.29	852.81	2560.45	2561.51	2457799	1.93	MS2	31.29	852.81	2560.45	2561.53	6: Cys_GCA
Component	11293	11:A71-A77 = 2145.3669m	71-77	Ar-pCr-pCr-pAr-pCr-pCr-pAr	None		2.16	100	0	0	0	0	0	1	MS2	Automatic	31.55	714.117	-3	2145.37	2146.27	2145.37	0	folded	folded	4234057	3559728	27	2885399	2.16	MS2	31.55	714.117	2145.37	2146.27	4234057	2.28	MS2	31.53	714.117	2145.37	2146.24	12: Ile_AAU
Component	11368	1:D47-G52 = 1812.2818m	47-52	Dr-pCr-pUr-pCr-pCr-pGr	None		2.27	99.5	0	0	0	0	0	1	MS2	Automatic	31.65	905.136	-2	1812.29	1813.05	1812.28	0	folded	folded	2551571	2409048	8	2551571	2.27	MS2	31.65	905.136	1812.29	1813.05	2266526	2.06	MS2	31.63	905.135	1812.29	1813.06	1: Ala_AGC
Component	11419	1:D47-G52 = 1812.2818m	47-52	Dr-pCr-pUr-pCr-pCr-pGr	None		1.59	99.5	0	0	0	0	0	1	MS2	Automatic	31.64	603.088	-3	1812.28	1813.05	1812.28	0	folded	folded	1454147	1335412	13	1454147	1.59	MS2	31.64	603.088	1812.28	1813.05	1216676	1.12	MS2	31.64	603.087	1812.28	1812.97	1: Ala_AGC
Component	11542	3:A46-G52 = 2179.3612m	46-52	Ar-pDr-pUr-pCm-pCr-pAr-pGr	None		2.31	100	0	0	0	0	0	1	MS2	Automatic	31.84	725.448	-3	2179.37	2180.28	2179.36	0	folded	folded	1485986	1394601	9	1485986	2.31	MS2	31.84	725.448	2179.37	2180.28	1303215	2.19	MS2	31.85	725.448	2179.37	2180.17	3: Arg_ICG
Component	11551	13:G38-G43 = 1864.2879m	38-43	Gm-pCr-pUr-pCr-pUr-pGr	None		1.98	99.9	0	0	0	0	0	1	MS2	Automatic	31.85	931.139	-2	1864.29	1865.01	1864.29	1	folded	folded	2496251	2365302	8	2496251	1.98	MS2	31.85	931.139	1864.29	1865.01	2234354	1.66	MS2	31.86	931.138	1864.29	1865.03	14: Leu_UAG
Component	11558	30:C26-G31 = 1834.2774m	26-31	Cr-pAr-pUr-pCr-pUr-pGr	None		3.32	100	0	0	0	0	0	1	MS2	Automatic	31.87	916.134	-2	1834.28	1835.07	1834.28	0	folded	folded	8611014	8250290	6	8611014	3.32	MS2	31.87	916.134	1834.28	1835.07	7889566	2.92	MS2	31.88	916.134	1834.28	1835.07	34: Val_AAC
Component	11600	11:A59-G64 = 1847.3090m	59-64	Am-pUr-pCr-pCr-pCr-pGr	None		2.49	100	0	0	0	0	0	1	MS2	Automatic	31.91	922.65	-2	1847.31	1847.92	1847.31	0	folded	folded	2293404	2220143	5	2293404	2.49	MS2	31.91	922.65	1847.31	1847.92	2146882	2.03	MS2	31.92	922.649	1847.31	1848.1	12: Ile_AAU
Component	11698	10:A58-G64 = 2164.3139m	58-64	Ar-pUr-pUr-pCr-pUr-pAr-pGr	None		2.17	99.7	0	0	0	0	0	1	MS2	Automatic	31.99	720.432	-3	2164.32	2165.05	2164.31	0	folded	folded	1875578	1687155	16	1875578	2.17	MS2	31.99	720.432	2164.32	2165.05	1498732	2.17	MS2	31.99	720.432	2164.32	2165.03	11: His_GUG_2
Component	11877	5:U11-G17 = 2167.3136m	11-17	Ur-pUr-pUr-pAr-pAr-pDr-pGr	None		2.44	100	0	0	0	0	0	1	MS2	Automatic	32.22	721.432	-3	2167.32	2168.22	2167.31	0	folded	folded	15370718	15099299	3	15370718	2.44	MS2	32.22	721.432	2167.32	2168.22	14827880	2.44	MS2	32.22	721.432	2167.32	2168.22	5: Asp_GUC
Component	12122	28:U3-G9 = 2163.3299m	3-9	Ur-pCr-pCr-pAr-pAr-pUr-pGr	None		2.12	99.2	0	0	0	0	0	1	MS2	Automatic	32.48	720.104	-3	2163.33	2164.43	2163.33	0	folded	folded	1415964	1338136	8	1415964	2.12	MS2	32.48	720.104	2163.33	2164.43	1260309	1.9	MS2	32.48	720.438	2163.33	2164.08	32: Val_UAC
Component	12473	28:U3-G9 = 2163.3299m	3-9	Ur-pCr-pCr-pAr-pAr-pUr-pGr	None		5.51	97.9	0	0	0	0	0	1	MS2	Automatic	33.11	720.107	-3	2163.34	2164.16	2163.33	0	folded	folded	9450134	6832211	54	4214288	5.51	MS2	33.11	720.107	2163.34	2164.16	9450134	5.62	MS2	33.1	720.107	2163.34	2164.18	32: Val_UAC
Component	12500	27:C65-G70 = 1808.2981m	65-70	Cr-pCr-pCr-pCr-pCr-pGr	None		2.7	100	0	0	0	0	0	1	MS2	Automatic	32.94	903.144	-2	1808.3	1809.08	1808.3	0	folded	folded	2152996	2138486	1	2123975	2.7	MS2	32.94	903.144	1808.3	1809.08	2152996	2.63	MS2	32.96	903.144	1808.3	1809.1	31: Tyr_GUA
Component	13102	24:A67-G73 = 2177.3455m	67-73	Am-pAr-pUr-pCr-pCr-pUr-pGr	None		2.32	100	0	0	0	0	0	1	MS2	Automatic	33.84	724.776	-3	2177.35	2178.26	2177.35	0	folded	folded	4174875	3929966	9	3685058	2.32	MS2	33.84	724.776	2177.35	2178.26	4174875	2.54	MS2	33.84	724.776	2177.35	2178.27	27: Ser_GCU
Component	13330	20:C69-A75 = 2097.3445m	69-75	Cr-pCr-pCr-pCr-pCr-pCr-pAr	None		3.15	100	0	0	0	0	0	1	MS2	Automatic	34.26	698.11	-3	2097.35	2098.21	2097.34	0	folded	folded	5708852	5568714	4	5428576	3.15	MS2	34.26	698.11	2097.35	2098.21	5708852	3.73	MS2	34.26	698.11	2097.35	2098.23	22: Pro_UGG
Component	13483	26:U68-A75 = 2429.3490m	68-75	Ur-pUr-pUr-pCr-pAr-pCr-pCr-pAr	None		3.05	100	0	0	0	0	0	1	MS2	Automatic	34.41	808.778	-3	2429.36	2430.34	2429.35	0	folded	folded	13259810	12099973	14	10940136	3.05	MS2	34.41	808.778	2429.36	2430.34	13259810	2.45	MS2	34.4	808.778	2429.36	2430.35	30: Trp_CCA
Component	13647	3:U1-G7 = 2116.2914m(Na+)	1-7	Ur-pUr-pCr-pCr-pUr-pCr-pGr	Na+		-3.62	98.8	0	0	0	0	0	1	MS2	Automatic	34.54	711.748	-3	2138.27	2139.22	2138.27	0	folded	folded	1927744	1691165	20	1927744	-3.62	MS2	34.54	711.748	2138.27	2139.22	1454586	-2.94	MS2	34.52	711.748	2138.27	2139.19	3: Arg_ICG
Component	13653	3:U1-G7 = 2116.2914m	1-7	Ur-pUr-pCr-pCr-pUr-pCr-pGr	None		2.8	99.9	0	0	0	0	0	1	MS2	Automatic	34.53	704.425	-3	2116.3	2117.1	2116.29	0	folded	folded	12950203	12221962	8	12950203	2.8	MS2	34.53	704.425	2116.3	2117.1	11493721	2.57	MS2	34.53	704.425	2116.3	2117.1	3: Arg_ICG
Component	13773	27:U37-G45 = 2867.4543m	37-45	Ur-pAr-pEr-pAr-pUr-pCr-pUr-pUr-pGr	None		3.58	100	0	0	0	0	0	1	MS2	Automatic	34.63	955.148	-3	2867.46	2868.63	2867.45	0	folded	folded	11851928	10841306	13	11851928	3.58	MS2	34.63	955.148	2867.46	2868.63	9830683	3.5	MS2	34.66	955.148	2867.46	2868.65	31: Tyr_GUA
Component	13836	26:C11-G18 = 2524.4086m	11-18	Cr-pUr-pCr-pAr-pAr-pDr-pGm-pGr	None		1.67	99.9	0	0	0	0	0	1	MS2	Automatic	34.71	840.464	-3	2524.41	2525.53	2524.41	1	folded	folded	4226133	4177182	2	4128232	1.67	MS2	34.71	840.464	2524.41	2525.53	4226133	1.77	MS2	34.72	840.464	2524.41	2525.45	30: Trp_CCA
Component	13849	23:A36-G45 = 3187.4953m	36-45	Ar-pEr-pAr-pUr-pCr-pUr-pUr-pUr-pUm-pGr	None		1.64	100	0	0	0	0	0	1	MS2	Automatic	34.78	1061.83	-3	3187.5	3188.89	3187.5	0	folded	folded	6945398	6718006	5	6945398	1.64	MS2	34.78	1061.83	3187.5	3188.89	6490613	1.48	MS2	34.78	1061.83	3187.5	3188.89	25: Ser_IGA_1
Component	14156	30:A69-A77 = 2804.4560m	69-77	Ar-pAr-pAr-pUr-pCr-pAr-pCr-pCr-pAr	None		5.77	100	0	0	0	0	0	1	MS2	Automatic	35	934.149	-3	2804.47	2805.67	2804.46	0	folded	folded	16637827	15813431	7	14989035	5.77	MS2	35	934.149	2804.47	2805.67	16637827	5.07	MS2	34.99	934.148	2804.47	2805.68	34: Val_AAC
Component	14357	19:A58-G65 = 2505.4140m	58-65	Am-pUr-pCr-pCr-pAr-pCr-pAr-pGr	None		2.06	99.8	0	0	0	0	0	1	MS2	Automatic	35.19	834.466	-3	2505.42	2506.41	2505.41	0	folded	folded	3056162	2818396	12	2580630	2.06	MS2	35.19	834.466	2505.42	2506.41	3056162	2.15	MS2	35.2	834.466	2505.42	2506.45	20: Phe_GAA_1
Component	14417	26:C24-G29 = 1811.2501m	24-29	Cr-pUr-pUr-pUr-pCr-pGr	None		2.55	99.9	0	0	0	0	0	1	MS2	Automatic	35.32	904.62	-2	1811.25	1812.04	1811.25	0	folded	folded	1865726	1699597	14	1533469	2.55	MS2	35.32	904.62	1811.25	1812.04	1865726	2.48	MS2	35.3	904.62	1811.25	1812.04	30: Trp_CCA
Component	14520	4:A2-G9 = 2468.3712m	2-9	Ar-pCr-pUr-pCr-pCr-pAr-pUr-pGr	None		3.04	100	0	0	0	0	0	1	MS2	Automatic	35.55	821.786	-3	2468.38	2469.38	2468.37	0	folded	folded	8644336	8303322	6	7962308	3.04	MS2	35.55	821.786	2468.38	2469.38	8644336	2.84	MS2	35.56	821.785	2468.38	2469.38	4: Asn_GUU
Component	14563	4:U36-G42 = 2309.3514m	36-42	Ur-pUr-pBr-pAr-pUr-pCr-pGr	None		2.82	0	0	0	0	0	0	1	MS2	Automatic	35.63	768.779	-3	2309.36	2310.34	2309.35	0	folded	folded	1828059	1702723	10	1577388	2.82	MS2	35.63	768.779	2309.36	2310.34	1828059	2.18	MS2	35.63	768.778	2309.36	2310.36	4: Asn_GUU
Component	14786	4:U36-G42 = 2309.3514m	36-42	Ur-pUr-pBr-pAr-pUr-pCr-pGr	None		2.6	0.1	0	0	0	0	0	1	MS2	Automatic	35.97	768.779	-3	2309.36	2310.33	2309.35	0	folded	folded	5115141	5061380	2	5007618	2.6	MS2	35.97	768.779	2309.36	2310.33	5115141	2.6	MS2	35.97	768.779	2309.36	2310.31	4: Asn_GUU
Component	15103	25:C2-G9 = 2446.3280m	2-9	Cr-pUr-pUr-pCr-pUr-pAr-pUr-pGr	None		2.66	100	0	0	0	0	0	1	MS2	Automatic	36.41	814.438	-3	2446.33	2447.36	2446.33	0	folded	folded	7696056	7620703	1	7696056	2.66	MS2	36.41	814.438	2446.33	2447.36	7545350	3.16	MS2	36.38	814.438	2446.34	2447.42	29: Thr_AGU_2
Component	15156	14:C77-A85 = 2779.4607m	77-85	Cr-pAr-pAr-pCr-pCr-pAr-pCr-pCr-pAr	None		4.99	100	0	0	0	0	0	1	MS2	Automatic	36.43	925.817	-3	2779.47	2780.68	2779.46	0	folded	folded	12493337	11981008	6	11468680	4.99	MS2	36.43	925.817	2779.47	2780.68	12493337	5.87	MS2	36.45	925.817	2779.48	2780.68	15: Leu_CAA
Component	15280	14:C77-A85 = 2779.4607m	77-85	Cr-pAr-pAr-pCr-pCr-pAr-pCr-pCr-pAr	None		0.16	100	0	0	0	0	0	1	MS2	Automatic	36.45	1388.72	-2	2779.46	2780.68	2779.46	0	folded	folded	1957008	1074857	116	1957008	0.16	MS2	36.45	1388.72	2779.46	2780.68	192707	-0.02	MS2	36.58	1388.72	2779.46	2780.57	15: Leu_CAA
Component	15724	10:U24-G32 = 2797.4237m	24-32	Ur-pAr-pCr-pAr-pCr-pAr-pUr-pCr-pGr	None		4.33	100	0	0	0	0	0	1	MS2	Automatic	37.25	931.805	-3	2797.44	2798.69	2797.42	0	folded	folded	1754268	1751102	0	1747937	4.33	MS2	37.25	931.805	2797.44	2798.69	1754268	3.63	MS2	37.26	931.805	2797.43	2798.64	11: His_GUG_2
Component	15751	7:A57-G64 = 2443.3759m	57-64	Ar-pCr-pUr-pCr-pCr-pCr-pCr-pGr	None		2.62	99.9	0	0	0	0	0	1	MS2	Automatic	37.29	813.453	-3	2443.38	2444.36	2443.38	0	folded	folded	1204835	1106140	13	1007444	2.62	MS2	37.29	813.453	2443.38	2444.36	1204835	2.12	MS2	37.29	813.453	2443.38	2444.35	7: Glu_UUC
Component	15857	7:C32-G40 = 2838.3835m	32-40	Cr-pUr-pKr-pUr-pCr-pAr-pCr-pCr-pGr	None		2.67	100	0	0	0	0	0	1	MS2	Automatic	37.48	945.457	-3	2838.39	2839.68	2838.38	0	folded	folded	3192855	2919715	13	2646575	2.67	MS2	37.48	945.457	2838.39	2839.68	3192855	1.81	MS2	37.48	945.457	2838.39	2839.69	7: Glu_UUC
Component	16203	13:C77-A85 = 2733.4063m	77-85	Cr-pUr-pCr-pUr-pCr-pAr-pCr-pCr-pAr	None		4.8	100	0	0	0	0	0	1	MS2	Automatic	37.92	910.466	-3	2733.42	2734.62	2733.41	0	folded	folded	6812882	6375707	10	5938532	4.8	MS2	37.92	910.466	2733.42	2734.62	6812882	5.34	MS2	37.93	910.466	2733.42	2734.61	14: Leu_UAG
Component	16207	13:C77-A85 = 2733.4063m	77-85	Cr-pUr-pCr-pUr-pCr-pAr-pCr-pCr-pAr	None		0.34	100	0	0	0	0	0	1	Both	Automatic	37.92	1366.2	-2	2733.41	2734.53	2733.41	0	folded	folded	342724	341854	0	342724	0.34	MS2	37.92	1366.2	2733.41	2734.53	340983	0.16	Full	37.9	1366.2	2733.41	2734.66	14: Leu_UAG
Component	16289	13:A44-G52 = 2775.3805m	44-52	Ar-pUr-pAr-pUr-pCr-pUr-pUr-pCr-pGr	None		5.59	100	0	0	0	0	0	1	MS2	Automatic	38.07	924.457	-3	2775.4	2776.62	2775.38	0	folded	folded	7397606	7306548	2	7215490	5.59	MS2	38.07	924.457	2775.4	2776.62	7397606	5.24	MS2	38.09	924.457	2775.39	2776.62	14: Leu_UAG
Component	16997	24:U48-G56 = 2752.3533m	48-56	Ur-pUr-pUr-pUr-pAr-pCr-pCr-pUr-pGr	None		2.75	100	0	0	0	0	0	1	MS2	Automatic	38.82	916.78	-3	2752.36	2753.61	2752.35	0	folded	folded	2281251	2220430	4	2159610	2.75	MS2	38.82	916.78	2752.36	2753.61	2281251	2.75	MS2	38.82	916.78	2752.36	2753.6	27: Ser_GCU
Component	17303	14:A67-G76 = 3104.4330m	67-76	Ar-pAr-pUr-pCr-pUr-pCr-pUr-pUr-pAr-pGr	None		2.71	100	0	0	0	0	0	1	MS2	Automatic	39.34	1034.14	-3	3104.44	3105.75	3104.43	0	folded	folded	22531928	21415322	7	20298716	2.71	MS2	39.34	1034.14	3104.44	3105.75	22531928	1.92	MS2	39.36	1034.14	3104.44	3105.75	15: Leu_CAA
Component	17603	25:T54-G63 = 3131.4803m	54-63	Tr-pUr-pCr-pAr-pAm-pAr-pUr-pCr-pCr-pGr	None		2.08	100	0	0	0	0	0	1	MS2	Automatic	39.91	1043.16	-3	3131.49	3132.84	3131.48	0	folded	folded	2024204	1880247	11	1736291	2.08	MS2	39.91	1043.16	3131.49	3132.84	2024204	1.46	MS2	39.9	1043.15	3131.48	3132.87	29: Thr_AGU_2
Component	17620	17:C60-G68 = 2749.4012m	60-68	Cr-pCr-pCr-pCr-pCr-pUr-pAr-pUr-pGr	None		2.72	99.9	0	0	0	0	0	1	MS2	Automatic	39.92	915.462	-3	2749.41	2750.64	2749.4	0	folded	folded	403706	373768	11	343830	2.72	MS2	39.92	915.462	2749.41	2750.64	403706	2.81	MS2	39.93	915.797	2749.41	2750.65	18: Lys_3UU
Component	17731	13:A67-G76 = 3117.4646m	67-76	Am-pAr-pUr-pCr-pCr-pCr-pUr-pUr-pAr-pGr	None		2.41	100	0	0	0	0	0	1	MS2	Automatic	40.33	1038.48	-3	3117.47	3118.81	3117.46	0	folded	folded	5257872	4718301	16	4178730	2.41	MS2	40.33	1038.48	3117.47	3118.81	5257872	2.1	MS2	40.33	1038.48	3117.47	3118.83	14: Leu_UAG
Component	17777	26:A30-G40 = 3459.5488m	30-40	Ar-pCm-pUr-pCm-pCr-pAr-pAr-pAr-pUr-pCr-pGr	None		-0.56	99.2	0	0	0	0	0	1	MS2	Automatic	40.36	1152.51	-3	3459.55	3460.96	3459.55	0	folded	folded	1955236	1691030	22	1426824	-0.56	MS2	40.36	1152.51	3459.55	3460.96	1955236	-0.84	MS2	40.34	1152.51	3459.55	3461.11	30: Trp_CCA
Component	18025	26:U8-G18 = 3548.5601m	8-18	Ur-pGm-pGm-pCr-pUr-pCr-pAr-pAr-pDr-pGm-pGr	None		-0.01	100	0	0	0	0	0	1	MS2	Automatic	40.75	1182.18	-3	3548.56	3550.06	3548.56	3	folded	folded	404965	319559	38	234154	-0.01	MS2	40.75	1182.18	3548.56	3550.06	404965	-0.08	MS2	40.75	1182.18	3548.56	3550.04	30: Trp_CCA
Component	18076	12:C32-G40 = 2943.4452m	32-40	Cr-pUr-pUr-pAr-pUr-pBr-pAr-pCr-pGr	None		2.85	21.9	0	0	0	0	0	1	MS2	Automatic	40.84	980.478	-3	2943.45	2944.73	2943.45	0	folded	folded	1303412	1296016	1	1288621	2.85	MS2	40.84	980.478	2943.45	2944.73	1303412	3.19	MS2	40.86	980.478	2943.45	2944.79	13: Ile_UAU
Component	18114	19:A66-A76 = 3431.5175m	66-76	Ar-pAr-pUr-pUr-pCr-pGr-pCr-pAr-pCr-pCr-pAr	None		0.59	99.9	0	0	0	0	0	1	MS2	Automatic	40.89	1143.16	-3	3431.52	3432.62	3431.52	1	folded	folded	1366836	1256311	12	1145786	0.59	MS2	40.89	1143.16	3431.52	3432.62	1366836	0.81	MS2	40.91	1143.17	3431.52	3433.27	20: Phe_GAA_1
Component	18297	16:C60-G69 = 3077.4697m	60-69	Cr-pCr-pCr-pCr-pCr-pUr-pAr-pCr-pAr-pGr	None		2.86	100	0	0	0	0	0	1	MS2	Automatic	41.23	1025.15	-3	3077.48	3078.89	3077.47	0	folded	folded	3636755	3533432	4	3430108	2.86	MS2	41.23	1025.15	3077.48	3078.89	3636755	2.86	MS2	41.25	1025.15	3077.48	3078.8	17: Lys_CUU
Component	18301	16:C60-G69 = 3077.4697m	60-69	Cr-pCr-pCr-pCr-pCr-pUr-pAr-pCr-pAr-pGr	None		2.86	100	0	0	0	0	0	1	MS2	Automatic	41.23	1025.15	-3	3077.48	3078.91	3077.47	0	folded	folded	3781444	3676774	4	3572104	2.86	MS2	41.23	1025.15	3077.48	3078.91	3781444	2.86	MS2	41.25	1025.15	3077.48	3078.81	17: Lys_CUU
Component	18416	25:U36-G45 = 3368.5049m	36-45	Ur-pBr-pAr-pUr-pGr-pUr-pGr-pGr-pAr-pGr	None		-5.96	0	0	0	0	0	0	1.1	Both	Automatic	41.5	1122.15	-3	3368.48	3369.88	3368.5	3	folded	folded	487479	484709	1	481938	-5.96	MS2	41.5	1122.15	3368.48	3369.88	487479	-6.25	Full	41.5	1122.15	3368.48	3369.96	29: Thr_AGU_2
Component	18463	8:D19-G30 = 3786.5969m	19-30	Dr-pAr-pAr-pAr-pAr-pUr-pCr-pCr-pAr-pAr-pCr-pGr	None		0.39	100	0	0	0	0	0	1	MS2	Automatic	41.58	1261.53	-3	3786.6	3788.26	3786.6	0	folded	folded	4554330	4330157	7	4105983	0.39	MS2	41.58	1261.53	3786.6	3788.26	4554330	0.59	MS2	41.6	1261.53	3786.6	3788.25	8: Gly_GCC
Component	18543	11:G1-G10 = 3180.4491m(Na+)	1-10	Gr-pGr-pUr-pCr-pUr-pCr-pUr-pUr-pGm-pGm	Na+		-1.63	99.7	0	0	0	0	0	1	Both	Automatic	41.74	1066.8	-3	3202.43	3204	3202.43	3	folded	folded	242533	188020	41	242533	-1.63	MS2	41.74	1066.8	3202.43	3204	133506	1.19	Full	41.73	1066.81	3202.43	3203.95	12: Ile_AAU
Component	18549	11:G1-G10 = 3180.4491m	1-10	Gr-pGr-pUr-pCr-pUr-pCr-pUr-pUr-pGm-pGm	None		1.82	99.9	0	0	0	0	0	1	MS2	Automatic	41.75	1059.48	-3	3180.45	3181.82	3180.45	3	folded	folded	531675	385590	54	531675	1.82	MS2	41.75	1059.48	3180.45	3181.82	239506	1.28	MS2	41.78	1059.48	3180.45	3181.81	12: Ile_AAU
Component	18635	2:A57-G66 = 3091.4854m	57-66	Am-pCr-pCr-pCr-pCr-pCr-pAr-pUr-pCr-pGr	None		2.83	99.9	0	0	0	0	0	1	MS2	Automatic	41.99	1029.82	-3	3091.49	3092.82	3091.49	0	folded	folded	1420125	1403661	2	1420125	2.83	MS2	41.99	1029.82	3091.49	3092.82	1387198	2.52	MS2	42	1029.82	3091.49	3092.81	2: Arg_UCU
Component	18943	26:T53-G63 = 3414.4784m	53-63	Tr-pUr-pCr-pAr-pAm-pUr-pUr-pCr-pCr-pUr-pGr	None		0.4	100	0	0	0	0	0	1	MS2	Automatic	42.66	1137.49	-3	3414.48	3415.92	3414.48	0	folded	folded	5405854	5394939	0	5384024	0.4	MS2	42.66	1137.49	3414.48	3415.92	5405854	0.04	MS2	42.64	1137.49	3414.48	3415.93	30: Trp_CCA
Component	19326	8:C63-A73 = 3423.5012m	63-73	Cr-pUr-pUr-pGr-pCr-pGr-pCr-pAr-pCr-pCr-pAr	None		0.58	100	0	0	0	0	0	1	Both	Automatic	43.47	1140.49	-3	3423.5	3425.03	3423.5	2	folded	folded	555215	384334	63	555215	0.58	MS2	43.47	1140.49	3423.5	3425.03	213452	-2.77	Full	43.44	1140.49	3423.49	3424.87	8: Gly_GCC
Component	19380	14:A32-G43 = 3805.5802m	32-43	Ar-pUr-pUr-pCm-pAr-pAr-pGm-pCr-pUr-pCr-pAr-pGr	None		1.11	100	0	0	0	0	0	1	MS2	Automatic	43.51	1267.86	-3	3805.58	3807.22	3805.58	1	folded	folded	667056	653471	3	639885	1.11	MS2	43.51	1267.86	3805.58	3807.22	667056	0.6	MS2	43.51	1267.85	3805.58	3807.26	15: Leu_CAA
Component	19452	2:A30-G41 = 3955.5854m	30-41	Ar-pCr-pUr-pJr-pCr-pUr-pBr-pAr-pUr-pCr-pAr-pGr	None		3.27	100	0	0	0	0	0	1	MS2	Automatic	43.61	988.143	-4	3955.6	3957.39	3955.59	0	folded	folded	3992679	3804428	7	3616176	3.27	MS2	43.61	988.143	3955.6	3957.39	3992679	2.72	MS2	43.62	988.142	3955.6	3957.37	2: Arg_UCU
Component	19461	15:C76-A87 = 3673.5254m	76-87	Cr-pAr-pUr-pCr-pCr-pUr-pUr-pCr-pAr-pCr-pCr-pAr	None		1.72	100	0	0	0	0	0	1	MS2	Automatic	43.62	1223.84	-3	3673.53	3675.05	3673.53	0	folded	folded	13473152	12435766	12	11398379	1.72	MS2	43.62	1223.84	3673.53	3675.05	13473152	1.26	MS2	43.64	1223.84	3673.53	3675.12	16: Leu_UAA
Component	19474	9:U64-A75 = 3712.5475m	64-75	Ur-pAr-pCr-pCr-pGr-pCr-pUr-pCr-pAr-pCr-pCr-pAr	None		-3.93	92.4	0	0	0	0	0	1	MS2	Automatic	43.69	1236.84	-3	3712.53	3714.24	3712.55	1	folded	folded	1546064	1503786	4	1461507	-3.93	MS2	43.69	1236.84	3712.53	3714.24	1546064	-2.81	MS2	43.72	1236.84	3712.54	3714.2	9: Gly_UCC
Component	19798	31:C65-A75 = 3462.5233m	65-75	Cr-pGr-pGr-pCr-pGr-pCr-pUr-pAr-pCr-pCr-pAr	None		0.11	100	0	0	0	0	0	1	MS2	Automatic	44.22	1153.5	-3	3462.52	3464	3462.52	3	folded	folded	1959146	1347445	64	1959146	0.11	MS2	44.22	1153.5	3462.52	3464	735744	1.38	MS2	44.12	1153.5	3462.53	3463.99	35: Ini_CAU
Component	20071	11:C65-A77 = 4104.6334m	65-77	Cr-pUr-pAr-pGr-pAr-pGr-pAr-pCr-pCr-pAr-pCr-pCr-pAr	None		4.49	100	0	0	0	0	0	1	MS2	Automatic	44.76	1025.4	-4	4104.65	4106.44	4104.63	2	folded	folded	7765276	6805910	20	7765276	4.49	MS2	44.76	1025.4	4104.65	4106.44	5846545	4.01	MS2	44.74	1025.4	4104.65	4106.43	12: Ile_AAU
Component	20527	7:C19-G31 = 4044.5997m	19-31	Cr-pDr-pAr-pUr-pCr-pAr-pCr-pAr-pUr-pCr-pAr-pCr-pGr	None		0.45	100	0	0	0	0	0	1	MS2	Automatic	45.62	1347.53	-3	4044.6	4047.66	4044.6	0	folded	folded	6605144	6221541	9	5837939	0.45	MS2	45.62	1347.53	4044.6	4047.66	6605144	0.57	MS2	45.63	1347.53	4044.6	4047.2	7: Glu_UUC
Component	20537	7:C19-G31 = 4044.5997m	19-31	Cr-pDr-pAr-pUr-pCr-pAr-pCr-pAr-pUr-pCr-pAr-pCr-pGr	None		4.25	100	0	0	0	0	0	1	MS2	Automatic	45.62	1010.4	-4	4044.62	4046.59	4044.6	0	folded	folded	6436446	5972384	11	5508322	4.25	MS2	45.62	1010.4	4044.62	4046.59	6436446	3.53	MS2	45.63	1010.4	4044.61	4046.58	7: Glu_UUC
Component	20707	31:C31-G42 = 3858.5691m	31-42	Cr-pUr-pCr-pAr-pUr-pBr-pAr-pCr-pCr-pCr-pUr-pGr	None		1.46	92.2	0	0	0	0	0	1	Both	Automatic	45.92	963.887	-4	3858.57	3860.19	3858.57	0	folded	folded	622199	618391	1	614582	1.46	MS2	45.92	963.887	3858.57	3860.19	622199	1.52	Full	45.93	963.887	3858.57	3860.22	35: Ini_CAU
Component	20748	8:G62-A73 = 3768.5486m	62-73	Gr-pCr-pUr-pUr-pGr-pCr-pGr-pCr-pAr-pCr-pCr-pAr	None		1.03	100	0	0	0	0	0	1	Both	Automatic	46.04	941.381	-4	3768.55	3769.78	3768.55	3	folded	folded	303216	264320	21	225424	1.03	Full	46.04	941.381	3768.55	3769.78	303216	2.58	MS2	46.07	941.382	3768.56	3769.93	8: Gly_GCC
Component	21083	19:A5-G18 = 4424.6254m	5-18	Ar-pUr-pUr-pUr-pAr-pGm-pCr-pUr-pCr-pAr-pGr-pDr-pDr-pGr	None		0.79	100	0	0	0	0	0	1	MS2	Automatic	46.85	1105.4	-4	4424.63	4426.54	4424.63	2	folded	folded	827603	764644	12	701686	0.79	MS2	46.85	1105.4	4424.63	4426.54	827603	1.34	MS2	46.84	1105.4	4424.63	4426.58	20: Phe_GAA_1
Component	21120	7:A57-G69 = 4034.5678m	57-69	Ar-pCr-pUr-pCr-pCr-pCr-pCr-pGr-pUr-pAr-pUr-pCr-pGr	None		2.27	100	0	0	0	0	0	1	Both	Automatic	46.99	1008.13	-4	4034.58	4036.85	4034.57	1	folded	folded	127296	121138	7	127296	2.27	Full	46.99	1008.13	4034.58	4036.85	114981	2.27	MS2	46.99	1008.13	4034.58	4036.71	7: Glu_UUC
Component	21173	27:A48-G59 = 3855.5806m	48-59	Ar-pDr-pCm-pGr-pGr-pGr-pCr-pGr-pTr-pUr-pCr-pGr	None		2.77	100	0	0	0	0	0	1	MS2	Automatic	47.07	963.141	-4	3855.59	3857.21	3855.58	4	folded	folded	498705	460769	12	498705	2.77	MS2	47.07	963.141	3855.59	3857.21	422832	2.2	MS2	47.07	963.141	3855.59	3857.2	31: Tyr_GUA
Component	21217	10:A45-G57 = 4126.6164m	45-57	Ar-pAr-pAr-pCr-pCm-pCr-pUr-pGr-pGr-pTr-pUr-pCr-pGr	None		-5.03	100	0	0	0	0	0	1	Both	Automatic	47.15	1374.86	-3	4126.6	4128.37	4126.62	2	folded	folded	373061	338863	14	304665	-5.03	MS2	47.15	1374.86	4126.6	4128.37	373061	-5.03	Full	47.16	1374.86	4126.6	4128.38	11: His_GUG_2
Component	21258	18:U31-G42 = 3860.5371m	31-42	Ur-pCr-pUr-pCr-pAr-pUr-pBr-pAr-pUr-pCr-pUr-pGr	None		4.37	100	0	0	0	0	0	1	MS2	Automatic	47.29	964.381	-4	3860.55	3862.19	3860.54	0	folded	folded	2674522	2512138	9	2349753	4.37	MS2	47.29	964.381	3860.55	3862.19	2674522	4.11	MS2	47.29	964.381	3860.55	3862.27	19: Met_CAU
Component	21372	4:T55-G68 = 4352.6295m	55-68	Tr-pUr-pCr-pAr-pAm-pCr-pCr-pCr-pUr-pCr-pAr-pCr-pUr-pGr	None		0.66	100	0	0	0	0	0	1	MS2	Automatic	47.4	1087.4	-4	4352.63	4354.52	4352.63	0	folded	folded	5810446	5636823	4	5810446	0.66	MS2	47.4	1087.4	4352.63	4354.52	5463199	0.32	MS2	47.4	1087.4	4352.63	4354.55	4: Asn_GUU
Component	21643	8:D19-G33 = 4743.6949m	19-33	Dr-pAr-pAr-pAr-pAr-pUr-pCr-pCr-pAr-pAr-pCr-pGr-pUr-pUr-pGr	None		0.18	100	0	0	0	0	0	1	MS2	Automatic	47.76	1185.17	-4	4743.7	4745.71	4743.69	1	folded	folded	2061634	1769219	23	1476804	0.18	MS2	47.76	1185.17	4743.7	4745.71	2061634	-0.02	MS2	47.74	1185.42	4743.69	4745.72	8: Gly_GCC
Component	21690	4:U36-G50 = 4918.7430m	36-50	Ur-pUr-pBr-pAr-pUr-pCr-pGr-pCr-pAr-pAr-pGr-pAr-pDr-pCm-pGr	None		-8.11	0	0	0	0	0	0	1	MS2	Automatic	47.92	1229.17	-4	4918.7	4920.88	4918.74	2	folded	folded	569340	510754	16	569340	-8.11	MS2	47.92	1229.17	4918.7	4920.88	452167	-8.41	MS2	47.95	1229.17	4918.7	4920.82	4: Asn_GUU
Component	21834	16:A31-G45 = 4847.6947m	31-45	Ar-pCr-pUr-pCr-pUr-pUr-pBr-pAr-pUr-pCr-pAr-pUr-pAr-pAr-pGr	None		1.85	100	0	0	0	0	0	1	MS2	Automatic	48.26	1211.42	-4	4847.7	4849.86	4847.69	0	folded	folded	4981238	4460511	17	3939785	1.85	MS2	48.26	1211.42	4847.7	4849.86	4981238	0.84	MS2	48.25	1211.42	4847.7	4849.76	17: Lys_CUU
Component	22146	19:G4-G18 = 4769.6729m	4-18	Gr-pAr-pUr-pUr-pUr-pAr-pGm-pCr-pUr-pCr-pAr-pGr-pDr-pDr-pGr	None		1.33	100	0	0	0	0	0	1	MS2	Automatic	49.06	1191.91	-4	4769.68	4771.81	4769.67	3	folded	folded	263385	247750	9	232114	1.33	MS2	49.06	1191.91	4769.68	4771.81	263385	1.33	MS2	49.08	1191.66	4769.68	4771.81	20: Phe_GAA_1
Component	22234	22:D19-G35 = 5550.869m	19-35	Dr-pDr-pAr-pAr-pGr-pGr-pCr-pOr-pAr-pCr-pAr-pGr-pAr-pCm-pUr-pLr-pGr	None		-1.17	100	0	0	0	0	0	1	MS2	Automatic	49.38	1387.21	-4	5550.86	5553.19	5550.87	3	folded	folded	382712	323541	26	382712	-1.17	MS2	49.38	1387.21	5550.86	5553.19	264370	-1.61	MS2	49.43	1387.21	5550.86	5553.29	24: Ser_UGA
Component	22386	8:G18-G33 = 5088.742m	18-33	Gr-pDr-pAr-pAr-pAr-pAr-pUr-pCr-pCr-pAr-pAr-pCr-pGr-pUr-pUr-pGr	None		1.12	100	0	0	0	0	0	1	MS2	Automatic	49.54	1271.68	-4	5088.75	5090.84	5088.74	2	folded	folded	1340474	836580	85	332686	1.12	MS2	49.54	1271.68	5088.75	5090.84	1340474	1.6	MS2	49.59	1271.68	5088.75	5090.91	8: Gly_GCC
Component	22499	6:D19-G33 = 4814.7069m	19-33	Dr-pAr-pGr-pCr-pGr-pCr-pAr-pGr-pCr-pAr-pGr-pAr-pUr-pUr-pGr	None		-0.18	100	0	0	0	0	0	1	Both	Automatic	49.76	1203.17	-4	4814.71	4816.77	4814.71	4	folded	folded	569750	409384	55	569750	-0.18	MS2	49.76	1203.17	4814.71	4816.77	249018	-4.74	Full	49.74	1203.16	4814.68	4816.72	6: Cys_GCA
Component	22565	6:D19-G33 = 4814.7069m	19-33	Dr-pAr-pGr-pCr-pGr-pCr-pAr-pGr-pCr-pAr-pGr-pAr-pUr-pUr-pGr	None		-0.68	100	0	0	0	0	0	0	Full	Automatic	49.74	1604.56	-3	4814.7	4816.82	4814.71	4	folded	folded	56826	34234	93	56826	-0.68	Full	49.74	1604.56	4814.7	4816.82	11643	-0.68	Full	49.8	1604.55	4814.7	4816	6: Cys_GCA
Component	22818	2:C2-G17 = 5140.747m	2-17	Cr-pUr-pCr-pGr-pCr-pGr-pUr-pGm-pGm-pCr-pGr-pUr-pAr-pAr-pDr-pGr	None		3.3	100	0	0	0	0	0	1	MS2	Automatic	50.26	1284.68	-4	5140.76	5143.03	5140.75	5	folded	folded	3848412	3032916	38	3848412	3.3	MS2	50.26	1284.68	5140.76	5143.03	2217420	1.31	MS2	50.29	1284.68	5140.75	5143.09	2: Arg_UCU
Component	22820	4:D20-G35 = 5166.774m	20-35	Dr-pDr-pAr-pAr-pGr-pGr-pCr-pOr-pUr-pGr-pCr-pGr-pAr-pCr-pUr-pGr	None		-3.81	100	0	0	0	0	0	1	MS2	Automatic	50.4	1291.19	-4	5166.75	5168.97	5166.77	4	folded	folded	977095	770255	38	977095	-3.81	MS2	50.4	1291.19	5166.75	5168.97	563414	-3.81	MS2	50.45	1291.19	5166.75	5168.89	4: Asn_GUU
Component	22859	10:D20-G35 = 5044.704m	20-35	Dr-pDr-pAr-pGr-pUr-pAr-pCr-pAr-pCr-pAr-pUr-pCr-pGr-pUr-pUr-pGr	None		0.01	100	0	0	0	0	0	1	Both	Automatic	50.37	1260.67	-4	5044.7	5046.95	5044.7	2	folded	folded	191685	159116	29	191685	0.01	MS2	50.37	1260.67	5044.7	5046.95	126547	0.78	Full	50.38	1260.67	5044.71	5047.06	11: His_GUG_2
Component	22865	4:D20-G35 = 5166.774m	20-35	Dr-pDr-pAr-pAr-pGr-pGr-pCr-pOr-pUr-pGr-pCr-pGr-pAr-pCr-pUr-pGr	None		-3.81	100	0	0	0	0	0	1	MS2	Automatic	50.4	1291.19	-4	5166.75	5168.9	5166.77	4	folded	folded	1050171	808114	42	1050171	-3.81	MS2	50.4	1291.19	5166.75	5168.9	566058	-3.81	MS2	50.45	1291.19	5166.75	5168.77	4: Asn_GUU
Component	22981	16:C60-A76 = 5317.766m	60-76	Cr-pCr-pCr-pCr-pCr-pUr-pAr-pCr-pAr-pGr-pGr-pGr-pCr-pUr-pCr-pCr-pAr	None		1.16	100	0	0	0	0	0	1	MS2	Automatic	50.69	1328.94	-4	5317.77	5320.1	5317.77	3	folded	folded	3387500	2468923	53	1550347	1.16	MS2	50.69	1328.94	5317.77	5320.1	3387500	1.44	MS2	50.72	1328.94	5317.77	5320.11	17: Lys_CUU
Component	23124	14:A67-A85 = 5945.850m	67-85	Ar-pAr-pUr-pCr-pUr-pCr-pUr-pUr-pAr-pGr-pCr-pAr-pAr-pCr-pCr-pAr-pCr-pCr-pAr	None		0.1	100	0	0	0	0	0	1	Both	Automatic	51.04	1485.96	-4	5945.85	5948.53	5945.85	1	folded	folded	366691	263716	55	160741	0.1	Full	51.04	1485.96	5945.85	5948.53	366691	0.59	MS2	51.12	1485.96	5945.85	5948.64	15: Leu_CAA
Component	23303	19:A58-A76 = 5998.887m	58-76	Am-pUr-pCr-pCr-pAr-pCr-pAr-pGr-pAr-pAr-pUr-pUr-pCr-pGr-pCr-pAr-pCr-pCr-pAr	None		1.21	100	0	0	0	0	0	1	MS2	Automatic	51.35	1499.22	-4	5998.89	6001.5	5998.89	2	folded	folded	14642989	11764416	35	14642989	1.21	MS2	51.35	1499.22	5998.89	6001.5	8885843	1.12	MS2	51.43	1499.22	5998.89	6001.49	20: Phe_GAA_1
Component	23361	16:C2-G18 = 5406.766m	2-18	Cr-pCr-pUr-pUr-pGr-pUr-pUr-pGm-pGm-pCr-pGr-pCr-pAr-pAr-pDr-pCr-pGr	None		0.14	100	0	0	0	0	0	1	MS2	Automatic	51.43	1351.19	-4	5406.77	5409.22	5406.77	4	folded	folded	309114	276055	17	309114	0.14	MS2	51.43	1351.19	5406.77	5409.22	242997	0.05	MS2	51.55	1351.19	5406.77	5409.09	17: Lys_CUU
Component	23515	25:U50-G67 = 5717.808m	50-67	Ur-pCr-pGr-pGr-pTr-pUr-pCr-pAr-pAm-pAr-pUr-pCr-pCr-pGr-pAr-pCr-pUr-pGr	None		0.74	100	0	0	0	0	0	1	MS2	Automatic	51.78	1429.2	-4	5717.81	5720.92	5717.81	3	folded	folded	682989	650793	7	618598	0.74	MS2	51.78	1429.2	5717.81	5720.92	682989	0.65	MS2	51.85	1428.95	5717.81	5720.69	29: Thr_AGU_2
Component	23687	30:A59-A77 = 6054.888m	59-77	Am-pUr-pCr-pCr-pUr-pGr-pGr-pGr-pCr-pGr-pAr-pAr-pAr-pUr-pCr-pAr-pCr-pCr-pAr	None		-0.19	100	0	0	0	0	0	1	MS2	Automatic	52.15	1513.21	-4	6054.89	6057.27	6054.89	4	folded	folded	637096	535542	27	433988	-0.19	MS2	52.15	1513.21	6054.89	6057.27	637096	0.13	MS2	52.23	1513.22	6054.89	6057.62	34: Val_AAC
Component	24053	1:A58-A76 = 5953.828m	58-76	Ar-pUr-pUr-pCr-pCr-pGr-pGr-pAr-pCr-pUr-pCr-pGr-pUr-pCr-pCr-pAr-pCr-pCr-pAr	None		3.04	100	0	0	0	0	0	1	MS2	Automatic	52.77	1487.95	-4	5953.85	5956.45	5953.83	3	folded	folded	5412794	5142466	7	4872138	3.04	MS2	52.77	1487.95	5953.85	5956.45	5412794	2.63	MS2	52.79	1487.95	5953.84	5956.41	1: Ala_AGC
Component	24068	26:C24-G43 = 6335.907m	24-43	Cr-pUr-pUr-pUr-pCr-pGr-pAr-pCm-pUr-pCm-pCr-pAr-pAr-pAr-pUr-pCr-pGr-pAr-pAr-pGr	None		-2.77	100	0	0	0	0	0	1	MS2	Automatic	52.75	1266.58	-5	6335.89	6338.64	6335.91	2	folded	folded	1261018	1109703	19	958388	-2.77	MS2	52.75	1266.58	6335.89	6338.64	1261018	-3.31	MS2	52.8	1266.58	6335.89	6338.75	30: Trp_CCA
Component	24082	29:A58-A76 = 6031.861m	58-76	Am-pUr-pCr-pCr-pUr-pCr-pGr-pGr-pUr-pUr-pGr-pGr-pAr-pAr-pCr-pAr-pCr-pCr-pAr	None		-1.02	100	0	0	0	0	0	1	MS2	Automatic	52.79	1205.76	-5	6031.85	6034.93	6031.86	4	folded	folded	3120358	2894298	11	3120358	-1.02	MS2	52.79	1205.76	6031.85	6034.93	2668237	-2.07	MS2	52.83	1205.76	6031.85	6034.92	33: Val_CAC
Component	24091	4:T55-G70 = 5042.724m	55-70	Tr-pUr-pCr-pAr-pAm-pCr-pCr-pCr-pUr-pCr-pAr-pCr-pUr-pGr-pGr-pGr	None		-9.92	97.4	0	0	0	0	0	1	Both	Automatic	52.78	1260.16	-4	5042.67	5044.96	5042.72	2	folded	folded	457089	405000	18	352911	-9.92	Full	52.78	1260.16	5042.67	5044.96	457089	-8.56	MS2	52.86	1259.91	5042.68	5044.88	4: Asn_GUU
Component	24132	23:C57-G76 = 6390.924m	57-76	Cm-pGr-pCr-pAr-pGr-pGr-pTr-pUr-pCr-pAr-pAr-pAr-pUr-pCr-pCr-pUr-pGr-pCr-pAr-pGr	None		-0.67	100	0	0	0	0	0	1	MS2	Automatic	53.01	1277.58	-5	6390.92	6393.84	6390.92	4	folded	folded	1216536	1059332	21	902128	-0.67	MS2	53.01	1277.58	6390.92	6393.84	1216536	-1.06	MS2	53.05	1277.58	6390.92	6393.77	25: Ser_IGA_1
Component	24148	19:G1-G18 = 5764.809m	1-18	Gr-pCr-pGr-pGr-pAr-pUr-pUr-pUr-pAr-pGm-pCr-pUr-pCr-pAr-pGr-pDr-pDr-pGr	None		0.43	100	0	0	0	0	0	1	MS2	Automatic	53.06	1440.7	-4	5764.81	5767.43	5764.81	5	folded	folded	1175876	948817	34	1175876	0.43	MS2	53.06	1440.7	5764.81	5767.43	721757	-1.94	MS2	53.12	1440.7	5764.8	5767.36	20: Phe_GAA_1
Component	24151	19:G1-G18 = 5764.809m(Na+)	1-18	Gr-pCr-pGr-pGr-pAr-pUr-pUr-pUr-pAr-pGm-pCr-pUr-pCr-pAr-pGr-pDr-pDr-pGr	Na+		-2.44	100	0	0	0	0	0	1	Both	Automatic	53.09	1156.75	-5	5786.78	5789.61	5786.79	5	folded	folded	642510	475427	50	642510	-2.44	MS2	53.09	1156.75	5786.78	5789.61	308344	-3.53	Full	53.12	1156.95	5786.77	5789.33	20: Phe_GAA_1
Component	24152	4:T55-G74 = 6343.886m	55-74	Tr-pUr-pCr-pAr-pAm-pCr-pCr-pCr-pUr-pCr-pAr-pCr-pUr-pGr-pGr-pGr-pGr-pUr-pCr-pGr	None		1.53	100	0	0	0	0	0	1	Both	Automatic	53.08	1268.38	-5	6343.9	6347.15	6343.89	4	folded	folded	480686	350281	53	219876	1.53	Full	53.08	1268.38	6343.9	6347.15	480686	1.53	MS2	53.13	1268.17	6343.9	6346.85	4: Asn_GUU
Component	24157	8:A55-A73 = 6009.829m	55-73	Ar-pUr-pUr-pCr-pCr-pGr-pGr-pGr-pCr-pUr-pUr-pGr-pCr-pGr-pCr-pAr-pCr-pCr-pAr	None		0.88	100	0	0	0	0	0	1	MS2	Automatic	53.08	1201.36	-5	6009.83	6014.21	6009.83	5	folded	folded	2196717	1648591	47	1100464	0.88	MS2	53.08	1201.36	6009.83	6014.21	2196717	0.88	MS2	53.15	1201.36	6009.83	6013.12	8: Gly_GCC
Component	24160	2:C24-G44 = 6898.997m	24-44	Cr-pOr-pUr-pCr-pUr-pGr-pAr-pCr-pUr-pJr-pCr-pUr-pBr-pAr-pUr-pCr-pAr-pGr-pAr-pAr-pGr	None		-5.69	0.1	0	0	0	0	0	1	MS2	Automatic	53.11	1379.19	-5	6898.96	6902.15	6899	2	folded	folded	1440646	979718	67	518791	-5.69	MS2	53.11	1379.19	6898.96	6902.15	1440646	-5.48	MS2	53.2	1379.19	6898.96	6901.98	2: Arg_UCU
Component	24278	29:U27-G45 = 6017.845m	27-45	Ur-pUr-pGr-pCr-pCr-pUr-pUr-pCr-pAr-pCr-pAr-pCr-pGr-pGr-pCr-pAr-pAr-pAr-pGr	None		-1.1	100	0	0	0	0	0	1	Both	Automatic	53.49	1202.96	-5	6017.84	6020.59	6017.85	3	folded	folded	605624	528163	21	450701	-1.1	Full	53.49	1202.96	6017.84	6020.59	605624	-0.61	MS2	53.53	1202.96	6017.84	6020.46	33: Val_CAC
Component	24533	28:A25-G46 = 7098.034m	25-46	Ar-pCr-pOr-pUr-pCr-pGr-pCr-pCr-pUr-pUr-pLr-pAr-pCr-pAr-pCr-pGr-pGr-pCr-pGr-pAr-pAr-pGr	None		-0.24	100	0	0	0	0	0	1	MS2	Automatic	54.08	1419.2	-5	7098.03	7101.31	7098.03	4	folded	folded	1644537	1500314	14	1356091	-0.24	MS2	54.08	1419.2	7098.03	7101.31	1644537	-1.34	MS2	54.13	1419	7098.02	7101.62	32: Val_UAC
Component	24580	26:C49-G67 = 5999.822m	49-67	Cr-pAr-pGr-pGr-pTr-pUr-pCr-pAr-pAm-pUr-pUr-pCr-pCr-pUr-pGr-pUr-pCr-pCr-pGr	None		-0.02	100	0	0	0	0	0	1	MS2	Automatic	54.15	1199.36	-5	5999.82	6002.42	5999.82	3	folded	folded	1220960	1176324	5	1131688	-0.02	MS2	54.15	1199.36	5999.82	6002.42	1220960	1.04	MS2	54.18	1199.36	5999.83	6002.47	30: Trp_CCA
Component	24634	25:A46-G67 = 7019.006m	46-67	Ar-pDr-pCm-pGr-pUr-pCr-pGr-pGr-pTr-pUr-pCr-pAr-pAm-pAr-pUr-pCr-pCr-pGr-pAr-pCr-pUr-pGr	None		-0.25	100	0	0	0	0	0	1	MS2	Automatic	54.26	1403.4	-5	7019	7022.22	7019.01	4	folded	folded	578997	565377	3	578997	-0.25	MS2	54.26	1403.4	7019	7022.22	551756	1.07	MS2	54.32	1403.2	7019.01	7022.09	29: Thr_AGU_2
Component	24707	4:A47-G68 = 6979.000m	47-68	Ar-pDr-pCm-pGr-pUr-pGr-pAr-pGr-pTr-pUr-pCr-pAr-pAm-pCr-pCr-pCr-pUr-pCr-pAr-pCr-pUr-pGr	None		0.49	100	0	0	0	0	0	1	MS2	Automatic	54.33	1395.39	-5	6979	6982.44	6979	3	folded	folded	428837	415814	4	402792	0.49	MS2	54.33	1395.39	6979	6982.44	428837	0.84	MS2	54.41	1395.4	6979.01	6982.16	4: Asn_GUU
Component	24873	30:G1-G18 = 5755.761m	1-18	Gr-pGr-pUr-pUr-pUr-pCr-pGr-pUr-pGm-pGr-pUr-pCr-pUr-pAr-pGr-pDr-pCr-pGr	None		2.66	99.4	0	0	0	0	0	1	Both	Automatic	54.71	1438.43	-4	5755.78	5758.33	5755.76	6	folded	folded	150164	75082	141	150164	2.66	MS2	54.71	1438.43	5755.78	5758.33	0	2.66	Full	54.74	1438.43	5755.78	5758.33	34: Val_AAC
Component	24874	30:G1-G18 = 5755.761m	1-18	Gr-pGr-pUr-pUr-pUr-pCr-pGr-pUr-pGm-pGr-pUr-pCr-pUr-pAr-pGr-pDr-pCr-pGr	None		1.98	99.4	0	0	0	0	0	0	Full	Automatic	54.72	1150.74	-5	5755.77	5758.65	5755.76	6	folded	folded	111383	58115	130	111383	1.98	Full	54.72	1150.74	5755.77	5758.65	4848	1.98	Full	54.95	1150.75	5755.77	5757.97	34: Val_AAC
Component	24958	14:C26-G49 = 7681.095m	26-49	Cr-pOr-pCr-pCr-pUr-pGr-pAr-pUr-pUr-pCm-pAr-pAr-pGm-pCr-pUr-pCr-pAr-pGr-pGr-pUr-pAr-pUr-pCr-pGr	None		0.81	100	0	0	0	0	0	1	MS2	Automatic	55.12	1535.81	-5	7681.1	7684.5	7681.09	4	folded	folded	8633239	8337582	5	8633239	0.81	MS2	55.12	1535.81	7681.1	7684.5	8041926	1.13	MS2	55.16	1535.81	7681.1	7684.53	15: Leu_CAA
Component	25108	5:A46-G67 = 6994.959m	46-67	Ar-pUr-pCm-pGr-pGr-pGr-pGr-pTr-pUr-pCr-pAr-pAr-pUr-pUr-pCr-pCr-pCr-pCr-pGr-pUr-pCr-pGr	None		3.91	100	0	0	0	0	0	1	MS2	Automatic	55.45	1398.39	-5	6994.99	6998.14	6994.96	5	folded	folded	2260034	2090440	11	1920846	3.91	MS2	55.45	1398.39	6994.99	6998.14	2260034	4.19	MS2	55.44	1398.39	6994.99	6998.08	5: Asp_GUC
Component	25283	24:C35-G66 = 10416.408m	35-66	Cr-pUr-pBr-pAr-pGr-pGr-pCr-pAr-pUr-pUm-pGr-pGr-pGr-pUr-pUr-pUr-pUr-pAr-pCr-pCr-pUr-pGr-pCm-pGr-pCr-pAr-pGr-pGr-pTr-pUr-pCr-pGr	None		0.33	0.1	0	0	0	0	0	1	MS2	Automatic	56.02	1735.76	-6	10416.4	10421.5	10416.4	9	folded	folded	1178082	860548	52	543014	0.33	MS2	56.02	1735.76	10416.4	10421.5	1178082	11.02	MS2	56.08	1735.76	10416.5	10421.5	27: Ser_GCU
Component	25426	8:U11-G33 = 7334.007m	11-33	Ur-pUr-pUr-pAr-pGr-pDr-pGr-pGr-pDr-pAr-pAr-pAr-pAr-pUr-pCr-pCr-pAr-pAr-pCr-pGr-pUr-pUr-pGr	None		0.36	100	0	0	0	0	0	1	MS2	Automatic	56.55	1466.4	-5	7334.01	7337.34	7334.01	4	folded	folded	1054578	688457	75	322335	0.36	MS2	56.55	1466.4	7334.01	7337.34	1054578	0.56	MS2	56.54	1466.4	7334.01	7337.13	8: Gly_GCC
Component	25574	26:C24-G48 = 7999.131m	24-48	Cr-pUr-pUr-pUr-pCr-pGr-pAr-pCm-pUr-pCm-pCr-pAr-pAr-pAr-pUr-pCr-pGr-pAr-pAr-pGr-pGr-pGm-pDr-pUr-pGr	None		0.48	99.3	0	0	0	0	0	1	MS2	Automatic	57.03	1599.42	-5	7999.14	8002.68	7999.13	5	folded	folded	705470	673742	7	642013	0.48	MS2	57.03	1599.42	7999.14	8002.68	705470	0.61	MS2	57.03	1599.42	7999.14	8002.67	30: Trp_CCA
Component	25618	4:U51-G74 = 7669.058m	51-74	Ur-pGr-pAr-pGr-pTr-pUr-pCr-pAr-pAm-pCr-pCr-pCr-pUr-pCr-pAr-pCr-pUr-pGr-pGr-pGr-pGr-pUr-pCr-pGr	None		1.42	100	0	0	0	0	0	1	MS2	Automatic	57.23	1533.41	-5	7669.07	7672.47	7669.06	6	folded	folded	893524	883723	2	893524	1.42	MS2	57.23	1533.41	7669.07	7672.47	873922	1.86	MS2	57.23	1533.41	7669.07	7672.45	4: Asn_GUU
Component	25703	1:C36-G57 = 7116.993m	36-57	Cr-pFr-pUr-pGr-pGr-pGr-pAr-pGr-pAr-pGr-pGr-pDr-pCr-pUr-pCr-pCr-pGr-pGr-pTr-pUr-pCr-pGr	None		3.51	100	0	0	0	0	0	1	MS2	Automatic	57.69	1423	-5	7117.02	7120.15	7116.99	8	folded	folded	1994920	1984915	1	1974910	3.51	MS2	57.69	1423	7117.02	7120.15	1994920	3.03	MS2	57.68	1423	7117.01	7120.17	1: Ala_AGC
Component	25736	11:C52-A77 = 8285.189m	52-77	Cr-pGr-pGr-pTr-pUr-pCr-pGr-pAm-pUr-pCr-pCr-pCr-pGr-pCr-pUr-pAr-pGr-pAr-pGr-pAr-pCr-pCr-pAr-pCr-pCr-pAr	None		-0.57	100	0	0	0	0	0	1	Both	Automatic	57.82	1656.63	-5	8285.18	8288.91	8285.19	6	folded	folded	594094	389930	74	185765	-0.57	Full	57.82	1656.63	8285.18	8288.91	594094	-1.64	MS2	57.82	1656.63	8285.18	8289.03	12: Ile_AAU
Component	25868	31:C24-G51 = 9102.335m	24-51	Cr-pOr-pCr-pAr-pGr-pGr-pGr-pCr-pUr-pCr-pAr-pUr-pBr-pAr-pCr-pCr-pCr-pUr-pGr-pAr-pUr-pGm-pDr-pCm-pCm-pUr-pCr-pGr	None		-5.58	99.4	0	0	0	0	0	0	Full	Automatic	58.31	1516.55	-6	9102.28	9106.44	9102.33	5	folded	folded	192039	149795	40	107550	-5.58	Full	58.31	1516.55	9102.28	9106.44	192039	-5.58	Full	58.29	1516.55	9102.28	9105.81	35: Ini_CAU
Component	25899	23:C53-G79 = 8608.194m	53-79	Cr-pCr-pCr-pGr-pCm-pGr-pCr-pAr-pGr-pGr-pTr-pUr-pCr-pAr-pAr-pAr-pUr-pCr-pCr-pUr-pGr-pCr-pAr-pGr-pUr-pUr-pGr	None		-0.7	100	0	0	0	0	0	1	MS2	Automatic	58.49	1721.23	-5	8608.19	8612.09	8608.19	6	folded	folded	528956	400937	45	528956	-0.7	MS2	58.49	1721.23	8608.19	8612.09	272917	-3.65	MS2	58.46	1721.43	8608.16	8612.31	25: Ser_IGA_1
Component	25943	8:U8-G33 = 8344.142m	8-33	Ur-pGm-pGr-pUr-pUr-pUr-pAr-pGr-pDr-pGr-pGr-pDr-pAr-pAr-pAr-pAr-pUr-pCr-pCr-pAr-pAr-pCr-pGr-pUr-pUr-pGr	None		-2.44	100	0	0	0	0	0	1	MS2	Automatic	58.72	1668.42	-5	8344.12	8348.04	8344.14	6	folded	folded	418786	296996	58	175205	-2.44	MS2	58.72	1668.42	8344.12	8348.04	418786	-0.57	MS2	58.73	1668.42	8344.14	8347.94	8: Gly_GCC
Component	25959	14:C57-A85 = 9218.314m	57-85	Cm-pAr-pAr-pGr-pAr-pGr-pTr-pUr-pCr-pGr-pAr-pAr-pUr-pCr-pUr-pCr-pUr-pUr-pAr-pGr-pCr-pAr-pAr-pCr-pCr-pAr-pCr-pCr-pAr	None		0.49	100	0	0	0	0	0	1	MS2	Automatic	58.79	1536.05	-6	9218.32	9222.53	9218.31	4	folded	folded	2129512	2088137	3	2129512	0.49	MS2	58.79	1536.05	9218.32	9222.53	2046762	0.91	MS2	58.81	1535.88	9218.32	9222.52	15: Leu_CAA
Component	26037	12:U50-A76 = 8551.208m	50-76	Ur-pGr-pGr-pGr-pTr-pUr-pCr-pAr-pAm-pUr-pCr-pCr-pCr-pCr-pAr-pCr-pCr-pUr-pCr-pGr-pAr-pGr-pCr-pAr-pCr-pCr-pAr	None		-0.4	99.9	0	0	0	0	0	0	Full	Automatic	58.99	1424.7	-6	8551.21	8554.85	8551.21	5	folded	folded	94342	75891	34	57439	-0.4	Full	58.99	1424.7	8551.21	8554.85	94342	-5.42	Full	59.02	1424.87	8551.16	8554.89	13: Ile_UAU
Component	26056	13:G3-G31 = 9498.379m	3-31	Gr-pAr-pGr-pUr-pUr-pUr-pGr-pGm-pCr-pMr-pGr-pAr-pGr-pDr-pGm-pGr-pDr-pDr-pDr-pAr-pAr-pGr-pGr-pCr-pOr-pUr-pCr-pAr-pGr	None		-5.91	99.9	0	0	0	0	0	1.2	Both	Automatic	59.18	1582.72	-6	9498.32	9502.56	9498.38	10	folded	folded	89703	70674	38	89703	-5.91	MS2	59.18	1582.72	9498.32	9502.56	51645	-8.48	Full	59.25	1582.72	9498.3	9502.96	14: Leu_UAG
Component	26078	11:A47-A77 = 9915.440m	47-77	Ar-pDr-pCm-pAr-pGr-pCr-pGr-pGr-pTr-pUr-pCr-pGr-pAm-pUr-pCr-pCr-pCr-pGr-pCr-pUr-pAr-pGr-pAr-pGr-pAr-pCr-pCr-pAr-pCr-pCr-pAr	None		0.47	100	0	0	0	0	0	1	MS2	Automatic	59.28	1652.23	-6	9915.44	9919.94	9915.44	7	folded	folded	1330249	975798	51	1330249	0.47	MS2	59.28	1652.23	9915.44	9919.94	621347	-1.9	MS2	59.37	1652.23	9915.42	9919.89	12: Ile_AAU
Component	26107	13:C57-A85 = 9201.286m	57-85	Cm-pAr-pAr-pGr-pGr-pGr-pTr-pUr-pCr-pGr-pAm-pAr-pUr-pCr-pCr-pCr-pUr-pUr-pAr-pGr-pCr-pUr-pCr-pUr-pCr-pAr-pCr-pCr-pAr	None		1.61	100	0	0	0	0	0	1	MS2	Automatic	59.37	1533.21	-6	9201.3	9205.41	9201.29	5	folded	folded	2457142	2306144	9	2457142	1.61	MS2	59.37	1533.21	9201.3	9205.41	2155146	0.87	MS2	59.46	1533.04	9201.29	9205.42	14: Leu_UAG
Component	26195	13:A54-A85 = 10181.411m	54-85	Ar-pUr-pGr-pCm-pAr-pAr-pGr-pGr-pGr-pTr-pUr-pCr-pGr-pAm-pAr-pUr-pCr-pCr-pCr-pUr-pUr-pAr-pGr-pCr-pUr-pCr-pUr-pCr-pAr-pCr-pCr-pAr	None		-0.39	100	0	0	0	0	0	1	MS2	Automatic	59.82	1696.56	-6	10181.4	10185.8	10181.4	6	folded	folded	647883	556284	23	647883	-0.39	MS2	59.82	1696.56	10181.4	10185.8	464685	-0.58	MS2	59.92	1696.56	10181.4	10185.6	14: Leu_UAG
Component	26223	8:C4-G33 = 9666.352m	4-33	Cm-pAr-pAr-pGr-pUr-pGm-pGr-pUr-pUr-pUr-pAr-pGr-pDr-pGr-pGr-pDr-pAr-pAr-pAr-pAr-pUr-pCr-pCr-pAr-pAr-pCr-pGr-pUr-pUr-pGr	None		-2.96	100	0	0	0	0	0	1	MS2	Automatic	60.05	1610.55	-6	9666.32	9670.92	9666.35	7	folded	folded	768445	625374	32	768445	-2.96	MS2	60.05	1610.55	9666.32	9670.92	482303	-1.95	MS2	60.09	1610.55	9666.33	9670.99	8: Gly_GCC
Component	26262	23:C53-G82 = 9564.308m	53-82	Cr-pCr-pCr-pGr-pCm-pGr-pCr-pAr-pGr-pGr-pTr-pUr-pCr-pAr-pAr-pAr-pUr-pCr-pCr-pUr-pGr-pCr-pAr-pGr-pUr-pUr-pGr-pUr-pCr-pGr	None		1.94	100	0	0	0	0	0	1	MS2	Automatic	60.23	1593.71	-6	9564.33	9568.7	9564.31	7	folded	folded	428392	363819	25	428392	1.94	MS2	60.23	1593.71	9564.33	9568.7	299246	-0.92	MS2	60.34	1593.71	9564.3	9568.67	25: Ser_IGA_1
Component	26271	5:C42-G72 = 9948.377m	42-72	Cr-pCr-pAr-pGr-pAr-pUr-pCm-pGr-pGr-pGr-pGr-pTr-pUr-pCr-pAr-pAr-pUr-pUr-pCr-pCr-pCr-pCr-pGr-pUr-pCr-pGr-pCr-pGr-pGr-pAr-pGr	None		-2.77	100	0	0	0	0	0	1	MS2	Automatic	60.37	1657.72	-6	9948.35	9953.12	9948.38	9	folded	folded	327278	316400	5	305523	-2.77	MS2	60.37	1657.72	9948.35	9953.12	327278	-4.63	MS2	60.42	1657.56	9948.33	9952.88	5: Asp_GUC
Component	26412	3:A37-G73 = 12018.736m	37-73	Ar-pAr-pCr-pCr-pAr-pGr-pAr-pAr-pGr-pAr-pDr-pUr-pCm-pCr-pAr-pGr-pGr-pTr-pUr-pCr-pAr-pAm-pGr-pUr-pCr-pCr-pUr-pGr-pGr-pCr-pGr-pGr-pGr-pGr-pAr-pAr-pGr	None		-7.76	100	0	0	0	0	0	1	MS2	Automatic	61.02	1716.53	-7	12018.6	12024.2	12018.7	11	folded	folded	374884	367738	3	360592	-7.76	MS2	61.02	1716.53	12018.6	12024.2	374884	-7.76	MS2	61.15	1716.67	12018.6	12024.3	3: Arg_ICG
Component	26427	8:C2-G33 = 10316.441m	2-33	Cr-pGr-pCm-pAr-pAr-pGr-pUr-pGm-pGr-pUr-pUr-pUr-pAr-pGr-pDr-pGr-pGr-pDr-pAr-pAr-pAr-pAr-pUr-pCr-pCr-pAr-pAr-pCr-pGr-pUr-pUr-pGr	None		-3.99	100	0	0	0	0	0	1	MS2	Automatic	61.12	1719.23	-6	10316.4	10321.2	10316.4	8	folded	folded	933667	844294	15	933667	-3.99	MS2	61.12	1719.23	10316.4	10321.2	754921	-4.18	MS2	61.21	1719.23	10316.4	10321.3	8: Gly_GCC
Component	26462	11:C42-A77 = 11600.671m	42-77	Cr-pGr-pGr-pGr-pGr-pAr-pDr-pCm-pAr-pGr-pCr-pGr-pGr-pTr-pUr-pCr-pGr-pAm-pUr-pCr-pCr-pCr-pGr-pCr-pUr-pAr-pGr-pAr-pGr-pAr-pCr-pCr-pAr-pCr-pCr-pAr	None		-3.44	100	0	0	0	0	0	1	MS2	Automatic	61.4	1933.27	-6	11600.6	11605.8	11600.7	11	folded	folded	3518126	3288681	10	3518126	-3.44	MS2	61.4	1933.27	11600.6	11605.8	3059236	-3.1	MS2	61.48	1933.27	11600.6	11605.9	12: Ile_AAU
Component	26545	31:D16-G52 = 12098.759m	16-52	Dr-pGr-pGr-pAr-pAr-pGr-pCr-pGr-pCr-pOr-pCr-pAr-pGr-pGr-pGr-pCr-pUr-pCr-pAr-pUr-pBr-pAr-pCr-pCr-pCr-pUr-pGr-pAr-pUr-pGm-pDr-pCm-pCm-pUr-pCr-pGr-pGr	None		-1.26	1.1	0	0	0	0	0	1	MS2	Automatic	61.72	1728.24	-7	12098.7	12104	12098.8	10	folded	folded	1172419	1159151	2	1172419	-1.26	MS2	61.72	1728.24	12098.7	12104	1145884	-1.75	MS2	61.97	1728.23	12098.7	12104.4	35: Ini_CAU
Component	26861	25:U36-A76 = 13370.896m	36-76	Ur-pBr-pAr-pUr-pGr-pUr-pGr-pGr-pAr-pGr-pAr-pDr-pCm-pGr-pUr-pCr-pGr-pGr-pTr-pUr-pCr-pAr-pAm-pAr-pUr-pCr-pCr-pGr-pAr-pCr-pUr-pGr-pGr-pAr-pAr-pGr-pCr-pAr-pCr-pCr-pAr	None		-8.04	99.9	0	0	0	0	0	1.2	MS2	Automatic	63.3	1909.55	-7	13370.8	13377.9	13370.9	11	folded	folded	331788	254734	43	331788	-8.04	MS2	63.3	1909.55	13370.8	13377.9	177679	-8.04	MS2	63.39	1909.56	13370.8	13376.4	29: Thr_AGU_2
Component	26869	24:U48-G66 = 6016.801m	48-66	Ur-pUr-pUr-pUr-pAr-pCr-pCr-pUr-pGr-pCm-pGr-pCr-pAr-pGr-pGr-pTr-pUr-pCr-pGr	None		0.97	100	0	0	0	0	0	1	MS2	Automatic	63.38	1202.75	-5	6016.81	6019.39	6016.8	4	folded	folded	3623373	3550022	3	3476670	0.97	MS2	63.38	1202.75	6016.81	6019.39	3623373	1.54	MS2	63.56	1202.76	6016.81	6019.45	27: Ser_GCU
Component	26950	24:U48-G66 = 6016.801m	48-66	Ur-pUr-pUr-pUr-pAr-pCr-pCr-pUr-pGr-pCm-pGr-pCr-pAr-pGr-pGr-pTr-pUr-pCr-pGr	None		1.3	100	0	0	0	0	0	1	MS2	Automatic	63.99	1202.76	-5	6016.81	6019.44	6016.8	4	folded	folded	1765165	1696569	6	1627973	1.3	MS2	63.99	1202.76	6016.81	6019.44	1765165	1.78	MS2	64.11	1202.76	6016.81	6019.48	27: Ser_GCU
Component	15817	10:C3-G11 = 2788.4121m	3-11	Cr-pCr-pAm-pUr-pCr-pUr-pUr-pAr-pGr	None		3.85	100	0	0	0	0	0	1	MS2	Automatic	37.36	928.801	-3	2788.42	2789.61	2788.41	0	folded	folded	2773873	2613354	9	2452835	3.85	MS2	37.36	928.801	2788.42	2789.61	2773873	3.94	MS2	37.37	928.801	2788.42	2789.64	11: His_GUG_2
Component	22989	10:C3-G19 = 5415.767m	3-19	Cr-pCr-pAm-pUr-pCr-pUr-pUr-pAr-pGr-pUr-pAr-pUr-pAr-pGr-pDr-pGm-pGr	None		-3.08	98.9	0	0	0	0	0	0	Full	Automatic	50.56	1082.35	-5	5415.75	5418.22	5415.77	3	folded	folded	27467	23379	25	27467	-3.08	Full	50.56	1082.35	5415.75	5418.22	19291	-0.19	Full	50.58	1082.36	5415.77	5418.63	11: His_GUG_2
Component	22999	10:C3-G19 = 5415.767m	3-19	Cr-pCr-pAm-pUr-pCr-pUr-pUr-pAr-pGr-pUr-pAr-pUr-pAr-pGr-pDr-pGm-pGr	None		-0.46	98.9	0	0	0	0	0	1.1	Both	Automatic	50.6	1353.18	-4	5415.76	5418.43	5415.77	3	folded	folded	179080	165690	11	152299	-0.46	MS2	50.6	1353.18	5415.76	5418.43	179080	-0.46	Full	50.65	1353.43	5415.76	5418.38	11: His_GUG_2
Component	26218	10:C3-G32 = 9565.328m	3-32	Cr-pCr-pAm-pUr-pCr-pUr-pUr-pAr-pGr-pUr-pAr-pUr-pAr-pGr-pDr-pGm-pGr-pDr-pDr-pAr-pGr-pUr-pAr-pCr-pAr-pCr-pAr-pUr-pCr-pGr	None		1.44	100	0	0	0	0	0	1	MS2	Automatic	59.71	1593.88	-6	9565.34	9569.58	9565.33	5	folded	folded	177782	173396	4	177782	1.44	MS2	59.71	1593.88	9565.34	9569.58	169010	-3.76	MS2	59.85	1593.72	9565.29	9569.47	11: His_GUG_2

## Sheet: Table S3
Table S3: Unique oligonucleotide digestion products detected in complete S. cerevisiae total tRNA RNase A digestion
Level	No.	Identification	Positions	Oligo Sequence	Mod	Site	∆ ppm	Conf. Score	Seq Length	Nonunique Seq	Isomer Group	Num of Iso Seq	Digest position	Best ASR	ID Type	Integration Type	RT	M/Z	Charge St.	Mono Mass Exp.	Avg Mass Exp.	Mono Mass Theo.	Missed Cleavages	Max Cond.	Min Cond.	Max MS Area	Avg MS Area: unfolded	%CV: unfolded	MS Area:2023_0221_unfolded_SC_tRNA_RA_CIP_45mgmL_1.raw	∆ ppm:2023_0221_unfolded_SC_tRNA_RA_CIP_45mgmL_1.raw	ID Type:2023_0221_unfolded_SC_tRNA_RA_CIP_45mgmL_1.raw	RT:2023_0221_unfolded_SC_tRNA_RA_CIP_45mgmL_1.raw	M/Z:2023_0221_unfolded_SC_tRNA_RA_CIP_45mgmL_1.raw	Mono Mass Exp.:2023_0221_unfolded_SC_tRNA_RA_CIP_45mgmL_1.raw	Avg Mass Exp.:2023_0221_unfolded_SC_tRNA_RA_CIP_45mgmL_1.raw	MS Area:2023_0221_unfolded_SC_tRNA_RA_CIP_45mgmL_2.raw	∆ ppm:2023_0221_unfolded_SC_tRNA_RA_CIP_45mgmL_2.raw	ID Type:2023_0221_unfolded_SC_tRNA_RA_CIP_45mgmL_2.raw	RT:2023_0221_unfolded_SC_tRNA_RA_CIP_45mgmL_2.raw	M/Z:2023_0221_unfolded_SC_tRNA_RA_CIP_45mgmL_2.raw	Mono Mass Exp.:2023_0221_unfolded_SC_tRNA_RA_CIP_45mgmL_2.raw	Avg Mass Exp.:2023_0221_unfolded_SC_tRNA_RA_CIP_45mgmL_2.raw	Oligo	Comment
Component	33	29:A9-U11 = 932.1851m	9-11	Ar-pGm-pUr	None		0.83	90.6	0	0	0	0	0	1	MS2	Automatic	13.31	465.086	-2	932.186	932.5	932.185	0	unfolded	unfolded	486842	479509	2	472176	0.83	MS2	13.31	465.086	932.186	932.5	486842	0.96	MS2	13.32	465.086	932.186	932.59	33: Val_CAC
Component	877	30:I35-C37 = 902.1746m	35-37	Ir-pAr-pCr	None		1.88	85	0	0	0	0	0	1	MS2	Automatic	15.42	450.081	-2	902.176	902.51	902.175	0	unfolded	unfolded	3245638	3231405	1	3245638	1.88	MS2	15.42	450.081	902.176	902.51	3217171	2.42	MS2	15.42	450.081	902.177	902.5	34: Val_AAC
Component	3111	14:A36-C39 = 1260.2536m	36-39	Ar-pAr-pGm-pCr	None		1.95	99.6	0	0	0	0	0	1	MS2	Automatic	19.23	629.121	-2	1260.26	1260.76	1260.25	0	unfolded	unfolded	8122503	8054520	1	8122503	1.95	MS2	19.23	629.121	1260.26	1260.76	7986538	1.66	MS2	19.24	629.121	1260.26	1260.76	15: Leu_CAA
Component	3176	25:A57-U60 = 1245.2427m	57-60	Ar-pAm-pAr-pUr	None		2.69	99.7	0	0	0	0	0	1	MS2	Automatic	19.35	621.616	-2	1245.25	1245.75	1245.24	0	unfolded	unfolded	4147689	4119481	1	4091274	2.69	MS2	19.35	621.616	1245.25	1245.75	4147689	2.3	MS2	19.33	621.616	1245.25	1245.75	29: Thr_AGU_2
Component	3511	21:G35-U39 = 1644.3371m	35-39	Gr-pAr-pEr-pAr-pUr	None		2.17	99.4	0	0	0	0	0	1	MS2	Automatic	19.71	821.163	-2	1644.34	1644.98	1644.34	0	unfolded	unfolded	2489221	2433779	3	2378338	2.17	MS2	19.71	821.163	1644.34	1644.98	2489221	2.1	MS2	19.69	821.163	1644.34	1644.96	23: Ser_CGA
Component	5066	3:A57-U60 = 1261.2377m	57-60	Ar-pAm-pGr-pUr	None		0.78	99.5	0	0	0	0	0	1	MS2	Automatic	21.62	629.612	-2	1261.24	1261.77	1261.24	0	unfolded	unfolded	7260128	6749712	11	6239297	0.78	MS2	21.62	629.612	1261.24	1261.77	7260128	0.59	MS2	21.6	629.612	1261.24	1261.79	3: Arg_ICG
Component	5237	3:G36-C39 = 1246.2380m	36-39	Gr-pAr-pAr-pCr	None		2.19	100	0	0	0	0	0	1	MS2	Automatic	21.7	622.113	-2	1246.24	1246.75	1246.24	0	unfolded	unfolded	35266636	34812442	2	35266636	2.19	MS2	21.7	622.113	1246.24	1246.75	34358248	2.19	MS2	21.69	622.113	1246.24	1246.76	3: Arg_ICG
Component	5250	3:G36-C39 = 1246.2380m(Na+)	36-39	Gr-pAr-pAr-pCr	Na+		-0.55	99.7	0	0	0	0	0	1	MS2	Automatic	21.72	633.102	-2	1268.22	1268.77	1268.22	0	unfolded	unfolded	3418400	3242784	8	3067168	-0.55	MS2	21.72	633.102	1268.22	1268.77	3418400	-0.36	MS2	21.69	633.102	1268.22	1268.58	3: Arg_ICG
Component	5325	7:G45-C48 = 1236.2424m[nonspecific]	45-48	Gr-pAr-pCr-pCm	nonspecific		3.28	89.8	0	0	0	0	0	1	MS2	Automatic	21.78	617.116	-2	1236.25	1236.68	1236.24	1	unfolded	unfolded	380495	363560	7	346625	3.28	MS2	21.78	617.116	1236.25	1236.68	380495	3.18	MS2	21.76	617.116	1236.25	1236.69	7: Glu_UUC
Component	5685	8:A20-U24 = 1560.2796m[nonspecific]	20-24	Ar-pAr-pAr-pAr-pUr	nonspecific		1.99	100	0	0	0	0	0	1	MS2	Automatic	22.17	779.134	-2	1560.28	1560.87	1560.28	0	unfolded	unfolded	47741956	45649856	6	43557756	1.99	MS2	22.17	779.134	1560.28	1560.87	47741956	1.91	MS2	22.12	779.134	1560.28	1560.88	8: Gly_GCC
Component	6878	15:A36-U40 = 1590.2902m	36-40	Ar-pAr-pGm-pAr-pUr	None		1.75	99.2	0	0	0	0	0	1	MS2	Automatic	23.26	794.139	-2	1590.29	1590.91	1590.29	0	unfolded	unfolded	2071863	2018068	4	1964273	1.75	MS2	23.26	794.139	1590.29	1590.91	2071863	1.83	MS2	23.21	794.139	1590.29	1590.9	16: Leu_UAA
Component	7198	4:A44-D48 = 1578.2902m[nonspecific]	44-48	Ar-pAr-pGr-pAr-pDr	nonspecific		1.69	97.4	0	0	0	0	0	1	MS2	Automatic	23.85	788.139	-2	1578.29	1578.89	1578.29	0	unfolded	unfolded	29357844	27456051	10	25554258	1.69	MS2	23.85	788.139	1578.29	1578.89	29357844	1.69	MS2	23.81	788.139	1578.29	1578.89	4: Asn_GUU
Component	7600	23:I34-U39 = 1974.3737m	34-39	Ir-pGr-pAr-pEr-pAr-pUr	None		1.85	99.6	0	0	0	0	0	1	MS2	Automatic	24.29	986.181	-2	1974.38	1975.25	1974.37	0	unfolded	unfolded	27271790	27249948	0	27271790	1.85	MS2	24.29	986.181	1974.38	1975.25	27228106	1.73	MS2	24.25	986.181	1974.38	1975.25	25: Ser_IGA_1
Component	7769	20:G34-U37 = 1293.2275m	34-37	Gr-pGr-pGm-pUr	None		1.83	98.4	0	0	0	0	0	1	MS2	Automatic	24.41	645.608	-2	1293.23	1293.74	1293.23	0	unfolded	unfolded	10703627	10632004	1	10703627	1.83	MS2	24.41	645.608	1293.23	1293.74	10560381	1.64	MS2	24.38	645.608	1293.23	1293.74	22: Pro_UGG
Component	9094	24:G45-U48 = 1279.2118m	45-48	Gr-pGr-pGr-pUr	None		1.78	99.8	0	0	0	0	0	1	MS2	Automatic	25.55	638.6	-2	1279.21	1279.72	1279.21	0	unfolded	unfolded	19260122	18389481	7	17518840	1.78	MS2	25.55	638.6	1279.21	1279.72	19260122	1.87	MS2	25.52	638.6	1279.21	1279.71	27: Ser_GCU
Component	9331	10:G1-C4 = 1238.2217m	1-4	Gr-pGr-pCr-pCr	None		2.37	99.9	0	0	0	0	0	1	Both	Automatic	25.78	618.105	-2	1238.22	1238.71	1238.22	1	unfolded	unfolded	141429	134690	7	141429	2.37	Full	25.78	618.105	1238.22	1238.71	127950	2.37	MS2	25.73	618.105	1238.22	1238.68	11: His_GUG_2
Component	9404	20:G34-U37 = 1293.2275m	34-37	Gr-pGr-pGm-pUr	None		1.36	98.7	0	0	0	0	0	1	MS2	Automatic	25.88	645.607	-2	1293.23	1293.74	1293.23	0	unfolded	unfolded	4363340	4059821	11	4363340	1.36	MS2	25.88	645.607	1293.23	1293.74	3756303	0.89	MS2	25.82	645.607	1293.23	1293.75	22: Pro_UGG
Component	9409	25:B37-G40 = 1392.2595m[nonspecific]	37-40	Br-pAr-pUr-pGr	nonspecific		1.76	0	0	0	0	0	0	1.3	MS2	Automatic	25.9	695.124	-2	1392.26	1393.58	1392.26	1	unfolded	unfolded	136866	126154	12	115442	1.76	MS2	25.9	695.124	1392.26	1393.58	136866	1.93	MS2	25.88	695.124	1392.26	1393.06	29: Thr_AGU_2
Component	9570	9:A37-U41 = 1592.2694m	37-41	Ar-pAr-pGr-pGr-pUr	None		2.66	99.7	0	0	0	0	0	1	MS2	Automatic	26.17	795.13	-2	1592.27	1592.79	1592.27	0	unfolded	unfolded	24267224	21601913	17	18936602	2.66	MS2	26.17	795.13	1592.27	1592.79	24267224	2.13	MS2	26.15	795.129	1592.27	1593.12	9: Gly_UCC
Component	9936	31:G56-C60 = 1589.3062m	56-60	Gr-pAm-pAr-pAr-pCr	None		2.3	100	0	0	0	0	0	1	MS2	Automatic	26.45	793.648	-2	1589.31	1589.71	1589.31	0	unfolded	unfolded	9342176	9332090	0	9322004	2.3	MS2	26.45	793.648	1589.31	1589.71	9342176	2.07	MS2	26.43	793.647	1589.31	1589.83	35: Ini_CAU
Component	10842	26:G1-C5 = 1591.2854m	1-5	Gr-pAr-pAr-pGr-pCr	None		1.52	98.5	0	0	0	0	0	1	MS2	Automatic	27.32	529.422	-3	1591.29	1591.91	1591.29	0	unfolded	unfolded	4349274	4071054	10	4349274	1.52	MS2	27.32	529.422	1591.29	1591.91	3792836	1.21	MS2	27.3	529.422	1591.29	1591.88	30: Trp_CCA
Component	11052	18:A35-U39 = 1682.2899m	35-39	Ar-pUr-pBr-pAr-pUr	None		1.89	0	0	0	0	0	0	1.2	MS2	Automatic	27.62	840.139	-2	1682.29	1682.93	1682.29	1	unfolded	unfolded	10476592	9532742	14	10476592	1.89	MS2	27.62	840.139	1682.29	1682.93	8588892	2.11	MS2	27.61	840.139	1682.29	1682.93	19: Met_CAU
Component	11169	19:G43-U47 = 1622.2800m[nonspecific]	43-47	Gr-pAr-pGr-pGm-pUr	nonspecific		0.99	96.3	0	0	0	0	0	1	MS2	Automatic	27.73	810.134	-2	1622.28	1622.92	1622.28	0	unfolded	unfolded	2864272	2754593	6	2644915	0.99	MS2	27.73	810.134	1622.28	1622.92	2864272	0.99	MS2	27.71	810.134	1622.28	1622.94	20: Phe_GAA_1
Component	11170	19:G43-U47 = 1622.2800m[nonspecific]	43-47	Gr-pAr-pGr-pGm-pUr	nonspecific		1.22	96.3	0	0	0	0	0	1	MS2	Automatic	27.74	539.753	-3	1622.28	1622.92	1622.28	0	unfolded	unfolded	406609	318480	39	230351	1.22	MS2	27.74	539.753	1622.28	1622.92	406609	1.22	MS2	27.71	539.753	1622.28	1622.92	20: Phe_GAA_1
Component	11498	15:A3-U7 = 1608.2644m[nonspecific]	3-7	Ar-pGr-pGr-pGr-pUr	nonspecific		0.86	96.2	0	0	0	0	0	1	Both	Automatic	28.38	803.126	-2	1608.27	1608.89	1608.26	0	unfolded	unfolded	340609	333174	3	340609	0.86	Full	28.38	803.126	1608.27	1608.89	325740	0.86	MS2	28.37	803.126	1608.27	1608.88	16: Leu_UAA
Component	11596	14:A58-T63 = 1935.3376m[nonspecific]	58-63	Ar-pAr-pGr-pAr-pGr-pTr	nonspecific		2.35	99.9	0	0	0	0	0	1	MS2	Automatic	28.54	966.664	-2	1935.34	1936.05	1935.34	0	unfolded	unfolded	55757248	51318954	12	46880660	2.35	MS2	28.54	966.664	1935.34	1936.05	55757248	2.41	MS2	28.5	966.664	1935.34	1935.85	15: Leu_CAA
Component	11989	28:G43-D48 = 1923.3376m[nonspecific]	43-48	Gr-pAr-pAr-pGr-pAr-pDr	nonspecific		2.68	99.8	0	0	0	0	0	1	MS2	Automatic	29.1	960.664	-2	1923.34	1924.16	1923.34	0	unfolded	unfolded	11468784	11086016	5	10703248	2.68	MS2	29.1	960.664	1923.34	1924.16	11468784	2.11	MS2	29.06	960.664	1923.34	1924.16	32: Val_UAC
Component	12279	8:G3-U8 = 1911.3264m	3-8	Gr-pCm-pAr-pAr-pGr-pUr	None		2.51	100	0	0	0	0	0	1	MS2	Automatic	29.36	954.658	-2	1911.33	1912.15	1911.33	1	unfolded	unfolded	42098312	41792300	1	42098312	2.51	MS2	29.36	954.658	1911.33	1912.15	41486288	2.51	MS2	29.35	954.658	1911.33	1912.14	8: Gly_GCC
Component	12600	11:A67-C72 = 1920.3379m	67-72	Ar-pGr-pAr-pGr-pAr-pCr	None		2.13	99.8	0	0	0	0	0	1	MS2	Automatic	29.65	959.164	-2	1920.34	1921.15	1920.34	0	unfolded	unfolded	75230032	74453080	1	73676128	2.13	MS2	29.65	959.164	1920.34	1921.15	75230032	2.2	MS2	29.62	959.164	1920.34	1921.16	12: Ile_AAU
Component	12606	25:G35-U39 = 1698.2848m[nonspecific]	35-39	Gr-pUr-pBr-pAr-pUr	nonspecific		2.14	0	0	0	0	0	0	1	MS2	Automatic	29.6	848.137	-2	1698.29	1699.03	1698.28	1	unfolded	unfolded	3079879	2881975	10	3079879	2.14	MS2	29.6	848.137	1698.29	1699.03	2684071	2.14	MS2	29.57	848.137	1698.29	1698.93	29: Thr_AGU_2
Component	13159	24:B37-C41 = 1736.3229m	37-41	Br-pAr-pGr-pGr-pCr	None		2.29	0	0	0	0	0	0	1	MS2	Automatic	30.29	867.156	-2	1736.33	1736.99	1736.32	0	unfolded	unfolded	5727070	5618913	3	5510756	2.29	MS2	30.29	867.156	1736.33	1736.99	5727070	2	MS2	30.26	867.156	1736.33	1737	27: Ser_GCU
Component	13419	18:G49-T54 = 1951.3325m[nonspecific]	49-54	Gr-pAr-pGr-pAr-pGr-pTr	nonspecific		2.06	98.6	0	0	0	0	0	1	MS2	Automatic	30.6	974.661	-2	1951.34	1951.94	1951.33	0	unfolded	unfolded	31097660	30944688	1	30791716	2.06	MS2	30.6	974.661	1951.34	1951.94	31097660	2.06	MS2	30.55	974.661	1951.34	1952.19	19: Met_CAU
Component	13524	23:O26-U32 = 2278.4058m	26-32	Or-pAr-pAr-pAr-pGr-pAr-pUr	None		-0.97	99.7	0	0	0	0	0	1	MS2	Automatic	30.64	1138.19	-2	2278.4	2279.36	2278.41	0	unfolded	unfolded	50147724	49852306	1	50147724	-0.97	MS2	30.64	1138.19	2278.4	2279.36	49556888	-0.97	MS2	30.63	1138.19	2278.4	2279.36	25: Ser_IGA_1
Component	13742	4:G68-U72 = 1624.2593m	68-72	Gr-pGr-pGr-pGr-pUr	None		2.26	100	0	0	0	0	0	1	MS2	Automatic	30.88	811.124	-2	1624.26	1624.87	1624.26	0	unfolded	unfolded	2503535	2457602	3	2411669	2.26	MS2	30.88	811.124	1624.26	1624.87	2503535	1.96	MS2	30.84	811.124	1624.26	1624.87	4: Asn_GUU
Component	13856	11:I35-C40 = 2011.3424m	35-40	Ir-pAr-pUr-pBr-pAr-pCr	None		1.33	0	0	0	0	0	0	1	MS2	Automatic	30.98	1004.66	-2	2011.35	2012.21	2011.34	1	unfolded	unfolded	6917851	6129903	18	6917851	1.33	MS2	30.98	1004.66	2011.35	2012.21	5341954	1.51	MS2	30.94	1004.66	2011.35	2012.21	12: Ile_AAU
Component	13864	25:G42-D47 = 1939.3325m[nonspecific]	42-47	Gr-pGr-pAr-pGr-pAr-pDr	nonspecific		2.45	97.8	0	0	0	0	0	1	MS2	Automatic	30.98	968.661	-2	1939.34	1940.17	1939.33	0	unfolded	unfolded	29603024	29569740	0	29536456	2.45	MS2	30.98	968.661	1939.34	1940.17	29603024	2.26	MS2	30.95	968.661	1939.34	1940.17	29: Thr_AGU_2
Component	15294	21:O26-U33 = 2613.4576m	26-33	Or-pAr-pGr-pAr-pGr-pAr-pCm-pUr	None		2.57	100	0	0	0	0	0	1	MS2	Automatic	32.74	870.148	-3	2613.46	2614.69	2613.46	1	unfolded	unfolded	2092109	2016254	5	1940399	2.57	MS2	32.74	870.148	2613.46	2614.69	2092109	2.67	MS2	32.7	870.481	2613.46	2614.63	23: Ser_CGA
Component	15385	11:G43-D48 = 1955.3274m[nonspecific]	43-48	Gr-pGr-pGr-pGr-pAr-pDr	nonspecific		2.16	100	0	0	0	0	0	1	MS2	Automatic	32.9	976.659	-2	1955.33	1956.04	1955.33	0	unfolded	unfolded	13493888	13384288	1	13274688	2.16	MS2	32.9	976.659	1955.33	1956.04	13493888	2.22	MS2	32.86	976.659	1955.33	1956.03	12: Ile_AAU
Component	15425	10:A63-U69 = 2266.3694m	63-69	Ar-pGr-pGr-pAr-pGr-pAr-pUr	None		2.47	99.9	0	0	0	0	0	1	MS2	Automatic	32.92	754.451	-3	2266.38	2267.06	2266.37	0	unfolded	unfolded	22165954	21279281	6	22165954	2.47	MS2	32.92	754.451	2266.38	2267.06	20392608	2.47	MS2	32.9	754.451	2266.38	2266.99	11: His_GUG_2
Component	15448	24:U36-C41 = 2042.3482m	36-41	Ur-pBr-pAr-pGr-pGr-pCr	None		1.39	0	0	0	0	0	0	1.2	MS2	Automatic	32.97	1020.17	-2	2042.35	2043.23	2042.35	1	unfolded	unfolded	2020901	1745540	22	2020901	1.39	MS2	32.97	1020.17	2042.35	2043.23	1470180	1.51	MS2	32.92	1020.17	2042.35	2043.22	27: Ser_GCU
Component	15511	25:I34-U39 = 2028.3214m	34-39	Ir-pGr-pUr-pBr-pAr-pUr	None		1.53	0	0	0	0	0	0	1.2	MS2	Automatic	33.03	1013.15	-2	2028.32	2029.2	2028.32	1	unfolded	unfolded	7100890	6286680	18	7100890	1.53	MS2	33.03	1013.15	2028.32	2029.2	5472470	1.59	MS2	32.97	1013.15	2028.32	2029.2	29: Thr_AGU_2
Component	15552	20:G1-U6 = 1943.3162m	1-6	Gr-pGr-pGr-pCm-pGr-pUr	None		3.12	100	0	0	0	0	0	1	MS2	Automatic	33.07	646.767	-3	1943.32	1944.15	1943.32	1	unfolded	unfolded	18421970	18138485	2	18421970	3.12	MS2	33.07	646.767	1943.32	1944.15	17855000	3.43	MS2	33.03	646.767	1943.32	1944.14	22: Pro_UGG
Component	15980	9:G42-C47 = 1952.3278m	42-47	Gr-pGr-pGr-pGr-pAr-pCr	None		3.49	95.2	0	0	0	0	0	1	MS2	Automatic	33.75	975.16	-2	1952.33	1952.81	1952.33	0	unfolded	unfolded	8455311	7420763	20	8455311	3.49	MS2	33.75	975.16	1952.33	1952.81	6386215	2.87	MS2	34.11	975.159	1952.33	1954.4	9: Gly_UCC
Component	16592	17:G68-C74 = 2281.3803m	68-74	Gr-pAr-pGr-pGr-pAr-pGr-pCr	None		2.6	93.8	0	0	0	0	0	1	MS2	Automatic	35.43	759.455	-3	2281.39	2282.39	2281.38	0	unfolded	unfolded	60259532	52998554	19	60259532	2.6	MS2	35.43	759.455	2281.39	2282.39	45737576	2.6	MS2	35.4	759.455	2281.39	2282.35	18: Lys_3UU
Component	16900	15:G1-U7 = 2298.3592m	1-7	Gr-pGr-pAr-pGr-pGr-pGr-pUr	None		3.46	98.5	0	0	0	0	0	1	MS2	Automatic	36.9	765.115	-3	2298.37	2299.26	2298.36	0	unfolded	unfolded	4449262	4235684	7	4022107	3.46	MS2	36.9	765.115	2298.37	2299.26	4449262	3.57	MS2	36.88	765.115	2298.37	2299.16	16: Leu_UAA
Component	16901	15:G1-U7 = 2298.3592m(Na+)	1-7	Gr-pGr-pAr-pGr-pGr-pGr-pUr	Na+		0.16	98.3	0	0	0	0	0	1	Both	Automatic	36.9	772.44	-3	2320.34	2321.32	2320.34	0	unfolded	unfolded	1120970	1050710	9	1120970	0.16	Full	36.9	772.44	2320.34	2321.32	980450	0.48	MS2	36.89	772.44	2320.34	2321.12	16: Leu_UAA
Component	17120	18:A17-C25 = 2939.4853m[nonspecific]	17-25	Ar-pGr-pGr-pAr-pAr-pGr-pAr-pGr-pCr	nonspecific		3.74	100	0	0	0	0	0	1	MS2	Automatic	38.36	979.158	-3	2939.5	2940.75	2939.49	0	unfolded	unfolded	15515796	14562686	9	13609576	3.74	MS2	38.36	979.158	2939.5	2940.75	15515796	3	MS2	38.31	979.157	2939.49	2940.76	19: Met_CAU
Component	17298	3:G67-C74 = 2626.4277m	67-74	Gr-pGr-pGr-pGr-pAr-pAr-pGr-pCr	None		4	100	0	0	0	0	0	1	MS2	Automatic	38.8	874.805	-3	2626.44	2627.59	2626.43	0	unfolded	unfolded	28311292	26193788	11	24076284	4	MS2	38.8	874.805	2626.44	2627.59	28311292	4.37	MS2	38.78	874.805	2626.44	2627.5	3: Arg_ICG
Component	17609	1:G39-D47 = 2974.4748m[nonspecific]	39-47	Gr-pGr-pGr-pAr-pGr-pAr-pGr-pGr-pDr	nonspecific		3.45	100	0	0	0	0	0	1	MS2	Automatic	41.29	990.821	-3	2974.49	2975.77	2974.47	0	unfolded	unfolded	13103437	12467112	7	13103437	3.45	MS2	41.29	990.821	2974.49	2975.77	11830786	3.13	MS2	41.28	990.82	2974.48	2975.76	1: Ala_AGC

## Sheet: Table S4
Table S4: Unique oligonucleotide digestion products detected in folded S. cerevisiae total tRNA RNase A digestion
Level	No.	Identification	Positions	Oligo Sequence	Mod	Site	∆ ppm	Conf. Score	Seq Length	Nonunique Seq	Isomer Group	Num of Iso Seq	Digest position	Best ASR	ID Type	Integration Type	RT	M/Z	Charge St.	Mono Mass Exp.	Avg Mass Exp.	Mono Mass Theo.	Missed Cleavages	Max Cond.	Min Cond.	Max MS Area	Avg MS Area: folded	%CV: folded	MS Area:2023_0221_folded_SC_tRNA_RA_CIP_45mgmL_1.raw	∆ ppm:2023_0221_folded_SC_tRNA_RA_CIP_45mgmL_1.raw	ID Type:2023_0221_folded_SC_tRNA_RA_CIP_45mgmL_1.raw	RT:2023_0221_folded_SC_tRNA_RA_CIP_45mgmL_1.raw	M/Z:2023_0221_folded_SC_tRNA_RA_CIP_45mgmL_1.raw	Mono Mass Exp.:2023_0221_folded_SC_tRNA_RA_CIP_45mgmL_1.raw	Avg Mass Exp.:2023_0221_folded_SC_tRNA_RA_CIP_45mgmL_1.raw	MS Area:2023_0221_folded_SC_tRNA_RA_CIP_45mgmL_2.raw	∆ ppm:2023_0221_folded_SC_tRNA_RA_CIP_45mgmL_2.raw	ID Type:2023_0221_folded_SC_tRNA_RA_CIP_45mgmL_2.raw	RT:2023_0221_folded_SC_tRNA_RA_CIP_45mgmL_2.raw	M/Z:2023_0221_folded_SC_tRNA_RA_CIP_45mgmL_2.raw	Mono Mass Exp.:2023_0221_folded_SC_tRNA_RA_CIP_45mgmL_2.raw	Avg Mass Exp.:2023_0221_folded_SC_tRNA_RA_CIP_45mgmL_2.raw	Oligo	Comment
Component	714	14:A36-C39 = 1260.2536m	36-39	Ar-pAr-pGm-pCr	None		1.85	98.9	0	0	0	0	0	1	MS2	Automatic	19.22	629.121	-2	1260.26	1260.76	1260.25	0	folded	folded	188960	185531	3	182103	1.85	MS2	19.22	629.121	1260.26	1260.76	188960	1.66	MS2	19.23	629.121	1260.26	1260.76	15: Leu_CAA
Component	719	25:A57-U60 = 1245.2427m	57-60	Ar-pAm-pAr-pUr	None		1.61	96.4	0	0	0	0	0	1	MS2	Automatic	19.33	621.615	-2	1245.24	1245.71	1245.24	0	folded	folded	51170	49883	4	51170	1.61	MS2	19.33	621.615	1245.24	1245.71	48596	1.71	MS2	19.34	621.615	1245.24	1245.8	29: Thr_AGU_2
Component	1974	13:A36-C39 = 1276.2486m	36-39	Ar-pGr-pGm-pCr	None		1.7	99.7	0	0	0	0	0	1	MS2	Automatic	21.53	637.118	-2	1276.25	1276.75	1276.25	0	folded	folded	494449	461635	10	428821	1.7	MS2	21.53	637.118	1276.25	1276.75	494449	1.51	MS2	21.57	637.118	1276.25	1276.75	14: Leu_UAG
Component	2150	8:A20-U24 = 1560.2796m[nonspecific]	20-24	Ar-pAr-pAr-pAr-pUr	nonspecific		1.99	97.6	0	0	0	0	0	1	MS2	Automatic	22.14	779.134	-2	1560.28	1560.87	1560.28	0	folded	folded	585355	564960	5	585355	1.99	MS2	22.14	779.134	1560.28	1560.87	544565	2.07	MS2	22.13	779.134	1560.28	1560.9	8: Gly_GCC
Component	3448	23:I34-U39 = 1974.3737m	34-39	Ir-pGr-pAr-pEr-pAr-pUr	None		3.27	99.9	0	0	0	0	0	1	Both	Automatic	24.27	986.183	-2	1974.38	1975.22	1974.37	0	folded	folded	471876	429470	14	471876	3.27	MS2	24.27	986.183	1974.38	1975.22	387065	3.15	Full	24.27	986.183	1974.38	1975.2	25: Ser_IGA_1
Component	3473	5:A56-C60 = 1513.2412m	56-60	Ar-pAr-pUr-pUr-pCr	None		1.89	97.8	0	0	0	0	0	1	MS2	Automatic	24.32	755.615	-2	1513.24	1513.82	1513.24	2	folded	folded	1265169	1094357	22	923545	1.89	MS2	24.32	755.615	1513.24	1513.82	1265169	1.81	MS2	24.31	755.615	1513.24	1513.84	5: Asp_GUC
Component	4301	24:G45-U48 = 1279.2118m	45-48	Gr-pGr-pGr-pUr	None		1.87	99.9	0	0	0	0	0	1	MS2	Automatic	25.55	638.6	-2	1279.21	1279.72	1279.21	0	folded	folded	1922519	1844247	6	1765974	1.87	MS2	25.55	638.6	1279.21	1279.72	1922519	2.06	MS2	25.55	638.6	1279.21	1279.71	27: Ser_GCU
Component	4624	9:A37-U41 = 1592.2694m	37-41	Ar-pAr-pGr-pGr-pUr	None		2.2	93.2	0	0	0	0	0	1	MS2	Automatic	26.21	795.129	-2	1592.27	1593.49	1592.27	0	folded	folded	679991	610226	16	679991	2.2	MS2	26.21	795.129	1592.27	1593.49	540461	2.36	MS2	26.17	795.129	1592.27	1593.31	9: Gly_UCC
Component	4791	27:G45-D49 = 1594.2851m[nonspecific]	45-49	Gr-pAr-pGr-pAr-pDr	nonspecific		1.34	97.4	0	0	0	0	0	1	MS2	Automatic	26.25	796.136	-2	1594.29	1594.86	1594.29	0	folded	folded	883768	864504	3	883768	1.34	MS2	26.25	796.136	1594.29	1594.86	845240	1.72	MS2	26.25	796.137	1594.29	1594.88	31: Tyr_GUA
Component	5727	18:A35-U39 = 1682.2899m	35-39	Ar-pUr-pBr-pAr-pUr	None		2.26	0.1	0	0	0	0	0	1.2	MS2	Automatic	27.59	840.14	-2	1682.29	1683.06	1682.29	1	folded	folded	572185	559525	3	546864	2.26	MS2	27.59	840.14	1682.29	1683.06	572185	2.4	MS2	27.57	840.14	1682.29	1683.07	19: Met_CAU
Component	6319	14:A58-T63 = 1935.3376m[nonspecific]	58-63	Ar-pAr-pGr-pAr-pGr-pTr	nonspecific		2.29	99.9	0	0	0	0	0	1	MS2	Automatic	28.52	966.664	-2	1935.34	1936.15	1935.34	0	folded	folded	5566592	5524598	1	5566592	2.29	MS2	28.52	966.664	1935.34	1936.15	5482605	1.78	MS2	28.49	966.663	1935.34	1936.17	15: Leu_CAA
Component	6904	8:G3-U8 = 1911.3264m	3-8	Gr-pCm-pAr-pAr-pGr-pUr	None		2.19	99.9	0	0	0	0	0	1	Both	Automatic	29.38	954.658	-2	1911.33	1912.17	1911.33	1	folded	folded	816355	796015	4	816355	2.19	Full	29.38	954.658	1911.33	1912.17	775674	2.13	MS2	29.33	954.658	1911.33	1912.08	8: Gly_GCC
Component	7090	25:G35-U39 = 1698.2848m[nonspecific]	35-39	Gr-pUr-pBr-pAr-pUr	nonspecific		2.07	0	0	0	0	0	0	1	MS2	Automatic	29.61	848.137	-2	1698.29	1698.95	1698.28	1	folded	folded	375377	365662	4	355946	2.07	MS2	29.61	848.137	1698.29	1698.95	375377	2.07	MS2	29.58	848.137	1698.29	1698.94	29: Thr_AGU_2
Component	7094	18:A20-C25 = 1920.3379m[nonspecific]	20-25	Ar-pAr-pGr-pAr-pGr-pCr	nonspecific		2.26	99.7	0	0	0	0	0	1	MS2	Automatic	29.61	959.164	-2	1920.34	1921.17	1920.34	0	folded	folded	5930720	5837678	2	5930720	2.26	MS2	29.61	959.164	1920.34	1921.17	5744635	1.88	MS2	29.59	959.164	1920.34	1921.15	19: Met_CAU
Component	7962	18:G49-T54 = 1951.3325m[nonspecific]	49-54	Gr-pAr-pGr-pAr-pGr-pTr	nonspecific		2.37	90.2	0	0	0	0	0	1	MS2	Automatic	30.63	974.661	-2	1951.34	1952.17	1951.33	0	folded	folded	1015348	999858	2	1015348	2.37	MS2	30.63	974.661	1951.34	1952.17	984369	2.31	MS2	30.6	974.661	1951.34	1951.97	19: Met_CAU
Component	7989	23:O26-U32 = 2278.4058m	26-32	Or-pAr-pAr-pAr-pGr-pAr-pUr	None		-0.33	100	0	0	0	0	0	1	MS2	Automatic	30.68	1138.19	-2	2278.41	2279.35	2278.41	0	folded	folded	979370	916879	10	979370	-0.33	MS2	30.68	1138.19	2278.41	2279.35	854387	-0.12	MS2	30.64	1138.7	2278.41	2279.38	25: Ser_IGA_1
Component	8148	11:I35-C40 = 2011.3424m	35-40	Ir-pAr-pUr-pBr-pAr-pCr	None		1.93	0.3	0	0	0	0	0	1	MS2	Automatic	30.97	1004.67	-2	2011.35	2012.08	2011.34	1	folded	folded	739259	715381	5	691503	1.93	MS2	30.97	1004.67	2011.35	2012.08	739259	1.87	MS2	30.93	1004.67	2011.35	2012.16	12: Ile_AAU
Component	8152	25:G42-D47 = 1939.3325m[nonspecific]	42-47	Gr-pGr-pAr-pGr-pAr-pDr	nonspecific		2.2	100	0	0	0	0	0	1	MS2	Automatic	30.98	968.661	-2	1939.34	1940.14	1939.33	0	folded	folded	842835	829628	2	842835	2.2	MS2	30.98	968.661	1939.34	1940.14	816422	2.01	MS2	30.96	968.661	1939.34	1940.17	29: Thr_AGU_2
Component	9140	10:A63-U69 = 2266.3694m	63-69	Ar-pGr-pGr-pAr-pGr-pAr-pUr	None		2.04	100	0	0	0	0	0	1	MS2	Automatic	32.94	754.451	-3	2266.37	2267.37	2266.37	0	folded	folded	644846	639246	1	633646	2.04	MS2	32.94	754.451	2266.37	2267.37	644846	1.93	MS2	32.93	754.451	2266.37	2267.14	11: His_GUG_2
Component	9150	24:U36-C41 = 2042.3482m	36-41	Ur-pBr-pAr-pGr-pGr-pCr	None		0.85	0.2	0	0	0	0	0	1	MS2	Automatic	32.97	679.776	-3	2042.35	2043.23	2042.35	1	folded	folded	393104	375131	7	357157	0.85	MS2	32.97	679.776	2042.35	2043.23	393104	0.67	MS2	32.96	679.776	2042.35	2043.23	27: Ser_GCU
Component	9452	1:O26-U32 = 2143.3387m	26-32	Or-pCr-pUr-pCr-pCr-pCr-pUr	None		2.01	100	0	0	0	0	0	1	Both	Automatic	33.59	713.774	-3	2143.34	2144.23	2143.34	5	folded	folded	235741	217420	12	235741	2.01	MS2	33.59	713.774	2143.34	2144.23	199100	1.89	Full	33.58	713.44	2143.34	2144.15	1: Ala_AGC
Component	10786	7:A66-C73 = 2547.3995m	66-73	Ar-pUr-pCr-pGr-pGr-pAr-pGr-pCr	None		3.24	99.9	0	0	0	0	0	1	MS2	Automatic	36.69	848.129	-3	2547.41	2548.42	2547.4	2	folded	folded	681181	622684	13	564187	3.24	MS2	36.69	848.129	2547.41	2548.42	681181	3.44	MS2	36.68	848.463	2547.41	2548.46	7: Glu_UUC
Component	11268	3:G67-C74 = 2626.4277m	67-74	Gr-pGr-pGr-pGr-pAr-pAr-pGr-pCr	None		2.98	99.5	0	0	0	0	0	1	MS2	Automatic	38.77	874.805	-3	2626.44	2627.51	2626.43	0	folded	folded	252192	223545	18	252192	2.98	MS2	38.77	874.805	2626.44	2627.51	194899	2.88	MS2	38.79	874.805	2626.44	2627.48	3: Arg_ICG
Component	11367	14:A42-U50 = 2854.4088m	42-50	Ar-pGr-pGr-pUr-pAr-pUr-pCr-pGr-pUr	None		2.71	100	0	0	0	0	0	1	MS2	Automatic	39.23	950.799	-3	2854.42	2856.14	2854.41	3	folded	folded	111830	107308	6	102787	2.71	MS2	39.23	950.799	2854.42	2856.14	111830	3.05	MS2	39.23	950.8	2854.42	2856.24	15: Leu_CAA
Component	11478	1:G24-U32 = 2793.4274m	24-32	Gr-pCr-pOr-pCr-pUr-pCr-pCr-pCr-pUr	None		3.08	100	0	0	0	0	0	1	MS2	Automatic	40.03	930.472	-3	2793.44	2794.65	2793.43	6	folded	folded	217066	213303	2	217066	3.08	MS2	40.03	930.472	2793.44	2794.65	209541	2.99	MS2	40.06	930.472	2793.44	2794.64	1: Ala_AGC
Component	11726	1:G39-D47 = 2974.4748m[nonspecific]	39-47	Gr-pGr-pGr-pAr-pGr-pAr-pGr-pGr-pDr	nonspecific		2.8	98.8	0	0	0	0	0	1	MS2	Automatic	41.29	990.487	-3	2974.48	2975.67	2974.47	0	folded	folded	261502	235598	16	261502	2.8	MS2	41.29	990.487	2974.48	2975.67	209695	2.47	MS2	41.29	990.487	2974.48	2975.55	1: Ala_AGC
Component	12056	27:A23-C34 = 3906.6517m[nonspecific]	23-34	Ar-pAr-pGr-pGr-pCr-pOr-pCr-pAr-pAr-pGr-pAr-pCr	nonspecific		0.28	100	0	0	0	0	0	1	Both	Automatic	42.12	1301.55	-3	3906.65	3908.3	3906.65	2	folded	folded	503982	476254	8	448527	0.28	Full	42.12	1301.55	3906.65	3908.3	503982	1.03	MS2	42.08	1301.88	3906.66	3908.35	31: Tyr_GUA
Component	12349	25:A21-U33 = 4162.6753m[nonspecific]	21-33	Ar-pAr-pGr-pGr-pCr-pOr-pCr-pCr-pAr-pCr-pAr-pCm-pUr	nonspecific		1.64	100	0	0	0	0	0	1	MS2	Automatic	43.24	1039.91	-4	4162.68	4164.41	4162.68	5	folded	folded	411484	378283	12	411484	1.64	MS2	43.24	1039.91	4162.68	4164.41	345082	1.52	MS2	43.22	1039.91	4162.68	4164.45	29: Thr_AGU_2
Component	12470	7:A21-C32 = 3736.5588m[nonspecific]	21-32	Ar-pUr-pCr-pAr-pCr-pAr-pUr-pCr-pAr-pCr-pGr-pCr	nonspecific		4	100	0	0	0	0	0	1	MS2	Automatic	43.77	933.388	-4	3736.57	3738.19	3736.56	6	folded	folded	507368	464531	13	507368	4	MS2	43.77	933.388	3736.57	3738.19	421694	3.61	MS2	43.75	933.386	3736.57	3738.13	7: Glu_UUC
Component	12480	2:A20-C31 = 3820.5911m	20-31	Ar-pAr-pCr-pGr-pCr-pOr-pUr-pCr-pUr-pGr-pAr-pCr	None		4.2	100	0	0	0	0	0	1	MS2	Automatic	43.81	954.395	-4	3820.61	3822.2	3820.59	5	folded	folded	795748	746667	9	697585	4.2	MS2	43.81	954.395	3820.61	3822.2	795748	3.43	MS2	43.79	954.395	3820.6	3822.23	2: Arg_UCU
Component	12507	23:A21-U33 = 4237.6723m[nonspecific]	21-33	Ar-pAr-pGr-pGr-pCr-pOr-pAr-pAr-pAr-pGr-pAr-pUr-pUr	nonspecific		2.79	100	0	0	0	0	0	1	MS2	Automatic	44.03	1058.66	-4	4237.68	4239.48	4237.67	2	folded	folded	423819	364958	23	306097	2.79	MS2	44.03	1058.66	4237.68	4239.48	423819	2.67	MS2	43.99	1058.66	4237.68	4239.57	25: Ser_IGA_1
Component	12519	7:A9-C19 = 3527.5247m	9-19	Ar-pGr-pUr-pGr-pUr-pAr-pAr-pCr-pGr-pGr-pCr	None		0.4	100	0	0	0	0	0	1	MS2	Automatic	44.08	1175.17	-3	3527.53	3529.02	3527.52	3	folded	folded	668968	663662	1	668968	0.4	MS2	44.08	1175.17	3527.53	3529.02	658357	0.61	MS2	44.04	1175.17	3527.53	3529.03	7: Glu_UUC
Component	12551	5:A21-C31 = 3566.5468m	21-31	Ar-pGr-pAr-pAr-pUr-pGr-pGr-pGr-pCr-pGr-pCr	None		-1.22	100	0	0	0	0	0	1.1	Both	Automatic	44.12	1188.17	-3	3566.54	3568.18	3566.55	2	folded	folded	122192	103934	25	85676	-1.22	Full	44.12	1188.17	3566.54	3568.18	122192	-1.63	MS2	44.13	1188.17	3566.54	3568	5: Asp_GUC
Component	12557	5:A21-C31 = 3566.5468m	21-31	Ar-pGr-pAr-pAr-pUr-pGr-pGr-pGr-pCr-pGr-pCr	None		1.04	100	0	0	0	0	0	0	Full	Automatic	44.15	890.882	-4	3566.55	3568	3566.55	2	folded	folded	57546	42496	50	27446	1.04	Full	44.15	890.882	3566.55	3568	57546	2.75	Full	44.12	890.882	3566.56	3568.15	5: Asp_GUC
Component	12602	14:A22-U33 = 3860.5973m[nonspecific]	22-33	Ar-pAr-pGr-pGr-pCr-pOr-pCr-pCr-pUr-pGr-pAr-pUr	nonspecific		2.05	99.7	0	0	0	0	0	1	Both	Automatic	44.31	964.394	-4	3860.61	3862.18	3860.6	4	folded	folded	239488	232998	4	226509	2.05	Full	44.31	964.394	3860.61	3862.18	239488	2.37	MS2	44.27	964.396	3860.61	3862.17	15: Leu_CAA
Component	12888	7:D20-C32 = 4044.5997m	20-32	Dr-pAr-pUr-pCr-pAr-pCr-pAr-pUr-pCr-pAr-pCr-pGr-pCr	None		2.38	100	0	0	0	0	0	1	MS2	Automatic	45.5	1010.4	-4	4044.61	4046.43	4044.6	6	folded	folded	380891	334225	20	380891	2.38	MS2	45.5	1010.4	4044.61	4046.43	287559	2.44	MS2	45.46	1010.4	4044.61	4046.46	7: Glu_UUC
Component	12983	5:C20-C31 = 3871.5881m[nonspecific]	20-31	Cr-pAr-pGr-pAr-pAr-pUr-pGr-pGr-pGr-pCr-pGr-pCr	nonspecific		3.22	99.7	0	0	0	0	0	1	MS2	Automatic	45.96	967.143	-4	3871.6	3873.27	3871.59	3	folded	folded	982557	905231	12	982557	3.22	MS2	45.96	967.143	3871.6	3873.27	827906	2.46	MS2	45.93	967.143	3871.6	3873.3	5: Asp_GUC
Component	13318	1:A21-U33 = 4078.5940m[nonspecific]	21-33	Ar-pGr-pCr-pGr-pCr-pOr-pCr-pUr-pCr-pCr-pCr-pUr-pUr	nonspecific		1.98	100	0	0	0	0	0	1	MS2	Automatic	47.1	1018.89	-4	4078.6	4080.41	4078.59	8	folded	folded	427636	416133	4	404630	1.98	MS2	47.1	1018.89	4078.6	4080.41	427636	1.8	MS2	47.1	1018.89	4078.6	4080.37	1: Ala_AGC
Component	13349	22:G35-U49 = 4872.7263m[nonspecific]	35-49	Gr-pAr-pEr-pAr-pUr-pCr-pUr-pGr-pUr-pUm-pGr-pGr-pGr-pCr-pUr	nonspecific		-0.65	100	0	0	0	0	0	1	MS2	Automatic	47.28	1217.68	-4	4872.72	4874.83	4872.73	6	folded	folded	223076	204915	13	223076	-0.65	MS2	47.28	1217.68	4872.72	4874.83	186755	-0.85	MS2	47.23	1217.68	4872.72	4874.94	24: Ser_UGA
Component	13524	26:A20-U32 = 4113.5848m[nonspecific]	20-32	Ar-pGr-pAr-pGr-pCr-pUr-pUr-pUr-pCr-pGr-pAr-pCm-pUr	nonspecific		4.07	100	0	0	0	0	0	1	MS2	Automatic	47.93	1027.64	-4	4113.6	4115.38	4113.58	6	folded	folded	570300	554003	4	570300	4.07	MS2	47.93	1027.64	4113.6	4115.38	537706	4.55	MS2	47.89	1027.64	4113.6	4115.37	30: Trp_CCA
Component	13621	3:A21-C32 = 3852.5810m	21-32	Ar-pCr-pGr-pGr-pCr-pOr-pUr-pCr-pUr-pGr-pGr-pCr	None		-7.9	99.7	0	0	0	0	0	1	MS2	Automatic	48.2	962.38	-4	3852.55	3854.25	3852.58	5	folded	folded	2686443	2671951	1	2657458	-7.9	MS2	48.2	962.38	3852.55	3854.25	2686443	-8.09	MS2	48.21	962.38	3852.55	3854.25	3: Arg_ICG
Component	13797	23:I34-U49 = 5163.741m	34-49	Ir-pGr-pAr-pEr-pAr-pUr-pCr-pUr-pUr-pUr-pUm-pGr-pGr-pGr-pCr-pUr	None		0.76	100	0	0	0	0	0	1	MS2	Automatic	48.43	1290.43	-4	5163.74	5165.98	5163.74	7	folded	folded	2937376	2814688	6	2937376	0.76	MS2	48.43	1290.43	5163.74	5165.98	2692000	1.23	MS2	48.38	1290.43	5163.75	5165.98	25: Ser_IGA_1
Component	13873	18:A17-U31 = 4903.7559m[nonspecific]	17-31	Ar-pGr-pGr-pAr-pAr-pGr-pAr-pGr-pCr-pOr-pUr-pCr-pAr-pGr-pUr	nonspecific		-0.51	100	0	0	0	0	0	1	Both	Automatic	48.64	1225.43	-4	4903.75	4905.66	4903.76	3	folded	folded	163186	149145	13	163186	-0.51	MS2	48.64	1225.43	4903.75	4905.66	135104	-1.7	Full	48.59	1225.44	4903.75	4905.82	19: Met_CAU
Component	13921	2:U28-C39 = 3932.5582m	28-39	Ur-pGr-pAr-pCr-pUr-pJr-pCr-pUr-pBr-pAr-pUr-pCr	None		1.52	0	0	0	0	0	0	1	MS2	Automatic	48.92	982.384	-4	3932.56	3934.29	3932.56	6	folded	folded	3849556	3543055	12	3236554	1.52	MS2	48.92	982.384	3932.56	3934.29	3849556	1.4	MS2	48.89	982.384	3932.56	3934.31	2: Arg_UCU
Component	14103	5:A56-A71 = 5053.715m[nonspecific]	56-71	Ar-pAr-pUr-pUr-pCr-pCr-pCr-pCr-pGr-pUr-pCr-pGr-pCr-pGr-pGr-pAr	nonspecific		-2.57	100	0	0	0	0	0	1	Both	Automatic	49.45	1262.92	-4	5053.7	5055.88	5053.72	9	folded	folded	270822	267897	2	270822	-2.57	MS2	49.45	1262.92	5053.7	5055.88	264973	-2.67	Full	49.4	1262.92	5053.7	5055.7	5: Asp_GUC
Component	14116	19:G18-U33 = 5237.824m[nonspecific]	18-33	Gr-pGr-pGr-pAr-pGr-pAr-pGr-pCr-pOr-pCr-pCr-pAr-pGr-pAr-pCm-pUr	nonspecific		1.39	94.8	0	0	0	0	0	1.1	Both	Automatic	49.49	1308.95	-4	5237.83	5240.05	5237.82	4	folded	folded	232310	216520	10	232310	1.39	MS2	49.49	1308.95	5237.83	5240.05	200730	1.49	Full	49.4	1308.95	5237.83	5240.13	20: Phe_GAA_1
Component	14136	3:A21-U33 = 4158.6063m	21-33	Ar-pCr-pGr-pGr-pCr-pOr-pUr-pCr-pUr-pGr-pGr-pCr-pUr	None		-7.83	99.7	0	0	0	0	0	1	MS2	Automatic	49.52	1038.89	-4	4158.57	4160.37	4158.61	6	folded	folded	2555548	2326431	14	2097313	-7.83	MS2	49.52	1038.89	4158.57	4160.37	2555548	-7.36	MS2	49.55	1038.89	4158.58	4160.37	3: Arg_ICG
Component	14215	16:G18-C32 = 4858.7331m	18-32	Gr-pGr-pDr-pAr-pGr-pCr-pGr-pCr-pOr-pUr-pAr-pUr-pGr-pAr-pCr	None		-0.64	100	0	0	0	0	0	1	Both	Automatic	49.83	1213.93	-4	4858.73	4860.37	4858.73	4	folded	folded	227189	211221	11	227189	-0.64	MS2	49.83	1213.93	4858.73	4860.37	195252	-0.64	Full	49.84	1213.91	4858.73	4859.84	17: Lys_CUU
Component	14770	2:C27-C39 = 4237.5995m	27-39	Cr-pUr-pGr-pAr-pCr-pUr-pJr-pCr-pUr-pBr-pAr-pUr-pCr	None		-0.9	1.2	0	0	0	0	0	1	MS2	Automatic	50.93	1058.64	-4	4237.6	4239.43	4237.6	7	folded	folded	7360350	7088244	5	6816139	-0.9	MS2	50.93	1058.64	4237.6	4239.43	7360350	0.71	MS2	50.91	1058.64	4237.6	4239.38	2: Arg_UCU
Component	14818	8:A14-U31 = 5764.858m	14-31	Ar-pGr-pDr-pGr-pGr-pDr-pAr-pAr-pAr-pAr-pUr-pCr-pCr-pAr-pAr-pCr-pGr-pUr	None		-2.04	100	0	0	0	0	0	1	MS2	Automatic	50.98	1440.96	-4	5764.85	5767.38	5764.86	4	folded	folded	444668	421443	8	398218	-2.04	MS2	50.98	1440.96	5764.85	5767.38	444668	-3.23	MS2	50.91	1440.96	5764.84	5767.63	8: Gly_GCC
Component	14959	2:A14-C31 = 5781.873m	14-31	Ar-pAr-pDr-pGr-pGr-pCr-pAr-pAr-pCr-pGr-pCr-pOr-pUr-pCr-pUr-pGr-pAr-pCr	None		2.32	100	0	0	0	0	0	1	Both	Automatic	51.39	1444.96	-4	5781.89	5784.27	5781.87	6	folded	folded	252399	206185	32	159970	2.32	Full	51.39	1444.96	5781.89	5784.27	252399	0.8	MS2	51.35	1444.96	5781.88	5784.45	2: Arg_UCU
Component	15067	5:A56-C73 = 5703.804m	56-73	Ar-pAr-pUr-pUr-pCr-pCr-pCr-pCr-pGr-pUr-pCr-pGr-pCr-pGr-pGr-pAr-pGr-pCr	None		1.77	100	0	0	0	0	0	1	MS2	Automatic	51.84	1425.45	-4	5703.81	5706.31	5703.8	9	folded	folded	1831111	1772440	5	1831111	1.77	MS2	51.84	1425.45	5703.81	5706.31	1713768	1.26	MS2	51.82	1425.45	5703.81	5706.33	5: Asp_GUC
Component	15101	1:G18-U33 = 5076.730m	18-33	Gr-pGr-pDr-pAr-pGr-pCr-pGr-pCr-pOr-pCr-pUr-pCr-pCr-pCr-pUr-pUr	None		-1.6	100	0	0	0	0	0	1	Both	Automatic	51.88	1268.68	-4	5076.72	5078.88	5076.73	8	folded	folded	196511	181912	11	196511	-1.6	Full	51.88	1268.68	5076.72	5078.88	167313	-1.31	MS2	51.85	1268.68	5076.72	5078.94	1: Ala_AGC
Component	15412	5:G39-U54 = 5178.738m	39-54	Gr-pUr-pGr-pCr-pCr-pAr-pGr-pAr-pUr-pCm-pGr-pGr-pGr-pGr-pTr-pUr	None		0.59	100	0	0	0	0	0	1	MS2	Automatic	52.33	1294.18	-4	5178.74	5181.05	5178.74	5	folded	folded	801233	799160	0	801233	0.59	MS2	52.33	1294.18	5178.74	5181.05	797087	0.49	MS2	52.34	1294.18	5178.74	5181.05	5: Asp_GUC
Component	15616	3:G36-U55 = 6440.962m	36-55	Gr-pAr-pAr-pCr-pCr-pAr-pGr-pAr-pAr-pGr-pAr-pDr-pUr-pCm-pCr-pAr-pGr-pGr-pTr-pUr	None		-0.14	100	0	0	0	0	0	1	MS2	Automatic	52.87	1287.59	-5	6440.96	6443.79	6440.96	5	folded	folded	625219	589658	9	625219	-0.14	MS2	52.87	1287.59	6440.96	6443.79	554096	1.15	MS2	52.81	1287.79	6440.97	6443.76	3: Arg_ICG
Component	15667	24:C32-U49 = 5905.815m	32-49	Cr-pUr-pGr-pCr-pUr-pBr-pAr-pGr-pGr-pCr-pAr-pUr-pUm-pGr-pGr-pGr-pUr-pUr	None		-4.84	0	0	0	0	0	0	1	MS2	Automatic	53.17	1180.55	-5	5905.79	5908.57	5905.82	8	folded	folded	1287467	1141122	18	994776	-4.84	MS2	53.17	1180.55	5905.79	5908.57	1287467	-5.09	MS2	53.16	1180.55	5905.79	5908.49	27: Ser_GCU
Component	16236	1:A14-U33 = 6363.912m	14-33	Ar-pGr-pDr-pCr-pGr-pGr-pDr-pAr-pGr-pCr-pGr-pCr-pOr-pCr-pUr-pCr-pCr-pCr-pUr-pUr	None		0.02	100	0	0	0	0	0	1	MS2	Automatic	54.85	1272.18	-5	6363.91	6366.98	6363.91	9	folded	folded	250215	226186	15	202158	0.02	MS2	54.85	1272.18	6363.91	6366.98	250215	1.02	MS2	54.84	1272.38	6363.92	6366.77	1: Ala_AGC
Component	16299	3:A57-C74 = 5860.865m	57-74	Ar-pAm-pGr-pUr-pCr-pCr-pUr-pGr-pGr-pCr-pGr-pGr-pGr-pGr-pAr-pAr-pGr-pCr	None		-1.07	100	0	0	0	0	0	1	MS2	Automatic	55.23	1171.77	-5	5860.86	5863.42	5860.87	5	folded	folded	1569130	1532248	3	1495366	-1.07	MS2	55.23	1171.77	5860.86	5863.42	1569130	-2.24	MS2	55.24	1171.57	5860.85	5863.4	3: Arg_ICG
Component	16549	24:A52-U64 = 4142.6114m	52-64	Ar-pCr-pCr-pUr-pGr-pCm-pGr-pCr-pAr-pGr-pGr-pTr-pUr	None		2	100	0	0	0	0	0	1	MS2	Automatic	56.37	1034.9	-4	4142.62	4144.42	4142.61	5	folded	folded	326586	313325	6	326586	2	MS2	56.37	1034.9	4142.62	4144.42	300064	2.35	MS2	56.34	1034.9	4142.62	4144.37	27: Ser_GCU
Component	16849	24:A52-U64 = 4142.6114m	52-64	Ar-pCr-pCr-pUr-pGr-pCm-pGr-pCr-pAr-pGr-pGr-pTr-pUr	None		2.82	100	0	0	0	0	0	1	MS2	Automatic	57.86	1034.9	-4	4142.62	4144.44	4142.61	5	folded	folded	421375	411746	3	421375	2.82	MS2	57.86	1034.9	4142.62	4144.44	402118	2.47	MS2	57.8	1034.9	4142.62	4144.44	27: Ser_GCU
Component	16947	23:A4-U33 = 9802.438m	4-33	Ar-pAr-pCr-pUr-pUr-pGr-pGr-pCr-pMr-pGr-pAr-pGr-pDr-pGm-pGr-pDr-pDr-pAr-pAr-pGr-pGr-pCr-pOr-pAr-pAr-pAr-pGr-pAr-pUr-pUr	None		-6.03	100	0	0	0	0	0	1	MS2	Automatic	58.35	1633.4	-6	9802.38	9806.9	9802.44	6	folded	folded	304426	281049	12	257672	-6.03	MS2	58.35	1633.4	9802.38	9806.9	304426	-0.65	MS2	58.29	1633.4	9802.43	9807.04	25: Ser_IGA_1
Component	17138	24:A52-U64 = 4142.6114m	52-64	Ar-pCr-pCr-pUr-pGr-pCm-pGr-pCr-pAr-pGr-pGr-pTr-pUr	None		2.47	100	0	0	0	0	0	1	MS2	Automatic	59.34	1034.9	-4	4142.62	4144.43	4142.61	5	folded	folded	535362	525461	3	535362	2.47	MS2	59.34	1034.9	4142.62	4144.43	515559	2.47	MS2	59.31	1034.9	4142.62	4144.45	27: Ser_GCU
Component	17657	24:U33-C65 = 10722.433m	33-65	Ur-pGr-pCr-pUr-pBr-pAr-pGr-pGr-pCr-pAr-pUr-pUm-pGr-pGr-pGr-pUr-pUr-pUr-pUr-pAr-pCr-pCr-pUr-pGr-pCm-pGr-pCr-pAr-pGr-pGr-pTr-pUr-pCr	None		-0.3	19	0	0	0	0	0	1	MS2	Automatic	63.1	1787.22	-6	10722.4	10725.5	10722.4	16	folded	folded	6142678	5461298	18	6142678	-0.3	MS2	63.1	1787.22	10722.4	10725.5	4779919	-4.59	MS2	63.69	1787.22	10722.4	10725.7	27: Ser_GCU
Component	17895	24:A52-U64 = 4142.6114m	52-64	Ar-pCr-pCr-pUr-pGr-pCm-pGr-pCr-pAr-pGr-pGr-pTr-pUr	None		-0.13	100	0	0	0	0	0	1	MS2	Automatic	67.85	1034.9	-4	4142.61	4144.4	4142.61	5	folded	folded	31093	28059	15	31093	-0.13	MS2	67.85	1034.9	4142.61	4144.4	25025	0.82	MS2	67.81	1034.9	4142.61	4144.41	27: Ser_GCU

## Sheet: Table S5
Table S5: Regions of S. cerevisiae total tRNA sequenced by combined complete and folded digestion approaches using RNase T1 and RNase A. Sequences and modification sites were obtained on Modomics. Nucleotides colored in Red were confidently sequenced in this study, where sequence coverages are displayed in Table 1 and Figure 3A.
Subtype	Feature	Sequence
Ala	AGC	GGGCGUGUKGCGUAGDCGGDAGCGCRCUCCCUUIGCOPGGGAGAGGDCUCCGGTPCGAUUCCGGACUCGUCCACCA
Arg	UCU	GCUCGCGUKLCGUAADGGCAACGCRPCUGACU1CU6APCAGAAGADUAUGGGTPCG"CCCCCAUCGUGAGUGCCA
Arg	ICG	PUCCUCGUKLCCCAADGGDCACGGCRPCUGGCUICGAACCAGAAGADU?CAGGTPCA"GUCCUGGCGGGGAAGCCA
Asn	GUU	GACUCCAUGLCCAAGDDGGDDAAGGCRUGCGACUGUU6APCGCAAGAD?GUGAGTPCA"CCCUCACUGGGGUCGCCA
Asp	GUC	UCCGUGAUAGUUPAADGGDCAGAAUGGGCGCPUGUCKCGUGCCAGAU?GGGGTPCAAUUCCCCGUCGCGGAGCCA
Cys	GCA	GCUCGUAUGGCGCAGDGGDAGCGCAGCAGAPUGCA+APCUGUUG7D?CUUAGTPCG"UCCUGAGUGCGAGCUCCA
Glu	UUC	UCCGAUAUAGUGPAACGGCDAUCACAPCACGCU3UCACCGUGGAGAC?GGGGTPCGACUCCCCGUAUCGGAGCCA
Gly	GCC	GCGBAAGUKGUUPAGDGGDAAAAUCCAACGPUGCCAPCGUUGGGC?CCGGTPCGAUUCCGGGCUUGCGCACCA
Gly	UCC	GGGCGGUUAGUGPAGDGGDDAUCAUCCCACCCUUCCAAGGUGGGGACACGGGTPCGAUUCUCGUACCGCUCACCA
His	GUG	GGCC:UCUUAGUAPAGD#GDDAGUACACAUCGPUGUGKCCGAUGAAAC?CUGGTPCGAUUCUAGGAGAUGGCACCA
Ile	AAU	GGUCUCUUKLCCCAGDDGGDDAAGGCACCGUGCUIAU6ACGCGGGGAD?AGCGGTPCG"UCCCGCUAGAGACCACCA
Ile	UAU	GCUCGUGUALCUCAGDGGDDAGAGCUPCGUGCUPAP6ACGCGACC7D?GUGGGTPCA"UCCCCACCPCGAGCACCA
Leu	UAG	GGGAGUUUGLCMGAGD#GDDDAAGGCRPCAGAPUUAGKCPCUGAUAUCUUCGGAUG?AAGGGTPCG"AUCCCUUAGCUCUCACCA
Leu	CAA	GGUUGUUUGLCMGAGC#GDCDAAGGCRCCUGAPU?AAKCPCAGGUAUCGUAAGAUG?AAGAGTPCGAAUCUCUUAGCAACCACCA
Leu	UAA	GGAGGGUUGLCMGAGD#GDCDAAGGCRGCAGABUUAAKAPCUGUUGGACGGUUGUCCG?GCGAGTPCG"ACCUCGCAUCCUUCACCA
Lys	CUU	GCCUUGUUKLCGCAADCGGDAGCGCRPAUGACUCUU6APCAUAAG7UUAGGGGTPCG"GCCCCCUACAGGGCUCCA
Lys	3UU	PCCUUGUUALCUCAGDDGGDAGAGCRPPCGGCU3UU6ACCGAAAU7D?AGGGGTPCG"GCCCCCUAPGAGGAGCCA
Met	CAU	GCUUCAGUALCUCAGDAGGAAGAGCRPCAGPCUCAU6APCUGAAG7D?GAGAGTPCG"ACCUCUCCUGGAGCACCA
Phe	GAA	GCGGAUUUALCUCAGDDGGGAGAGCRCCAGABU#AAYAP?UGGAG7UC?UGUGTPCG"UCCACAGAAUUCGCACCA
Pro	UGG	GGGBGUGUKGUCPAGDGGDAUGAUUCUCGCPUUGGKPGCGAGAG7CCCUGGGTPCA"UUCCCAGCUCGCCCCCCA
Ser	CGA	GGCACUAUGGCMGAGD#GDDAAGGCRAGAGA'UCGA+APCUCUJGGGCUCUGCCCG?GCUGGTPCAAAUCCUGCUGGUGUCGCCA
Ser	UGA	GGCACUAUGGCMGAGD#GDDAAGGCRACAGA'U&GA+APCUGUJGGGCUCUGCCCG?GCUGGTPCAAAUCCUGCUGGUGUCGCCA
Ser	IGA	GGCAACUUGGCMGAGD#GDDAAGGCRAAAGAPUIGA+APCUUUJGGGCUCUGCCCG?GCAGGTPCAAAUCCUGCAGUUGUCGCCA
Ser	GCU	GUCCCAGUGGCMGAGD#GDDAAGGCRAUGCCCUGCU6AGGCAUJGGGUUUUACCUG?GCAGGTPCG"AUCCUGUCUGUGACGCCA
Thr	AGU	GCUUCUAUGLCCAAGDDGGDAAGGCRCCACA'UIGU6APGUGGAGAD?GUCGGTPCA"AUCCGACUGGAAGCACCA
Trp	CCA	GAAGCGGUKLCUCAAD#GDAGAGCPPPCGABUBCAAAPCGAAGG7DUGCAGGTPCA"UUCCUGPCCGUUUCACCA
Tyr	GUA	CUCUCGGUALCCAAGDD#GDDDAAGGCRCAAGACUGPA+APCUUGAGAD?GGGCGTPCG"CUCGCCCCCGGGAGACCA
Val	UAC	GGUCCAAUGLUCCAGDGGDDCAAGACRPCGCCPU&ACACGGCGAAGADC?CGAGTPCG"ACCUCGGUUGGAUCACCA
Val	CAC	GUUCCAAUALUGPAGCGGCDAUCACLPPGCCPUCACACGGCAAAG7DC?CGAGTPCG"UCCUCGGUUGGAACACCA
Val	AAC	GGUUUCGUKGUCPAGDCGGDDAUGGCAPCUGCPUIACACGCAGAAC7DC?CCAGTPCG"UCCUGGGCGAAAUCACCA
Ini	CAU	AGCGCCGUKLCGCAGDGGAAGCGCRCAGGGCUCAU6ACCCUGAU7D??UCGGAUCG"AACCG^GCGGCGCUACCA

## Sheet: Table S6
Table S6: UHPLC gradients for analytical separation. %B corresponds to the percentage of B mobile phase (25 mM ammonium acetate, 2.5μM medronic acid in 80% acetonitrile)
Time (min)	B (%)
0	100
30	75
75	45
76	5
80	5
80.5	100
90	100
